1 **CEM500K – A large-scale heterogeneous unlabeled cellular electron microscopy image**  
2 **dataset for deep learning.**

3

4 **Ryan Conrad<sup>1,2</sup> and Kedar Narayan<sup>1,2</sup>**

5 <sup>1</sup>Center for Molecular Microscopy, Center for Cancer Research, National Cancer Institute,  
6 National Institutes of Health, Bethesda, Maryland, USA. <sup>2</sup>Cancer Research Technology Program,  
7 Frederick National Laboratory for Cancer Research, Frederick, Maryland, USA.

8

9 **Keywords:** electron microscopy, volume electron microscopy, vEM, convolutional neural  
10 networks, deep learning, automated segmentation, pre-training dataset, reference dataset

11

12 **Abstract**

13 Automated segmentation of cellular electron microscopy (EM) datasets remains a challenge.  
14 Supervised deep learning (DL) methods that rely on region-of-interest (ROI) annotations yield  
15 models that fail to generalize to unrelated datasets. Newer unsupervised DL algorithms require  
16 relevant pre-training images, however, pre-training on currently available EM datasets is  
17 computationally expensive and shows little value for unseen biological contexts, as these  
18 datasets are large and homogeneous. To address this issue, we present CEM500K, a nimble 25  
19 GB dataset of  $0.5 \times 10^6$  unique cellular EM images curated from nearly 600 three-dimensional  
20 (3D) and 10,000 two-dimensional (2D) images from >100 unrelated imaging projects. We show  
21 that models pre-trained on CEM500K learn features that are biologically relevant and resilient to  
22 meaningful image augmentations. Critically, we evaluate transfer learning from these pre-trained  
23 models on six publicly available and one newly derived benchmark segmentation task and report  
24 state-of-the-art results on each. We release the CEM500K dataset, pre-trained models and  
25 curation pipeline for model building and further expansion by the EM community. Code is  
26 available at <https://github.com/volume-em/cellemnet>

27

28

29

30

## 31 **Introduction**

32

33 Accurate image segmentation is essential for analyzing the structure of organelles and cells in  
34 electron microscopy (EM) image datasets. Segmentation of volume EM (vEM) data has enabled  
35 researchers to address questions of fundamental biological interest, including the organization of  
36 neural circuits [1][2] and the structure of various organelles [3][4][5]. Truly automated EM  
37 image segmentation methods hold the promise of significantly accelerating the rate of discovery  
38 by enabling researchers to extract and analyze information from their datasets without months or  
39 years of tedious manual labeling. While supervised deep learning (DL) models are effective at  
40 the segmentation of objects in natural images (e.g. of people, cars, furniture, and landscapes)  
41 [6][7][8][9] they require significant human oversight and correction when applied to the  
42 organelles and cellular structures captured by EM [10][11].

43

44 Many of the limitations of supervised DL segmentation models for cellular EM data result from  
45 a lack of large and, importantly, diverse training datasets [12][13][14]. Although several  
46 annotated image datasets for cell and organelle segmentation are publicly available, these often  
47 exclusively consist of images from a single experiment or tissue type, and a single imaging  
48 approach [15][16][17][18][19]. The homogeneity of such datasets often means that they are  
49 ineffective for training DL models to accurately segment images from unseen experiments.  
50 Instead, when confronted with new data, the norm is to extract and annotate small regions-of-  
51 interest (ROIs) from the EM image, train a model on the ROIs, and then apply the model to infer  
52 segmentations for the remaining unlabeled data [15][16][17][18][19][20][21]. Often, not only are  
53 these models dataset-specialized, reducing their utility, they often fail to generalize even to parts  
54 of the same dataset that are spatially distant from the training ROIs [16][22].

55

56 Gathering more annotated data for model training from disparate sources could certainly improve  
57 a model's ability to generalize to unseen images, yet it is rarely feasible for typical research  
58 laboratories to generate truly novel datasets; most have expertise in a particular imaging  
59 technique, organism or tissue type. Beyond collecting the EM data, manual segmentation is time-  
60 consuming and, unlike for natural images, difficult to crowdsource because of the extensive  
61 domain knowledge required to identify objects in novel cellular contexts. Promising work is

62 being done in the area of citizen science as it pertains to EM data, but it is clear that there are  
63 limitations to the range of structures that can be accurately segmented by volunteers [23][24].  
64 Moreover, structure-specific annotations will not solve the generalization problem for all  
65 possible EM segmentation targets; for example, thousands of hours spent labeling neurites is  
66 unlikely to buy any gains for mitochondrial segmentation. An efficient alternative to collecting  
67 additional structure-specific data is to use transfer learning. In transfer learning, a DL model is  
68 pre-trained on a general task and its parameters are fine-tuned on more specialized downstream  
69 tasks. A well-known example is to transfer parameters learned from the ImageNet classification  
70 task [25] to other classification or object detection tasks which have fewer training examples  
71 [26]. Transfer learning, when relevant pre-trained parameters are available, is the default  
72 approach for extracting the best performance out of small training datasets [27][28]. While  
73 ImageNet pre-trained models are sometimes used for cellular EM segmentation tasks [29][30],  
74 high-level features learned from ImageNet may not be applicable to biological imaging domains  
75 [31]. Building a more domain-specific annotated dataset large enough for pre-training would be a  
76 significant bottleneck, and indeed, it required multiple years to annotate the  $3.2 \times 10^6$  images that  
77 form the basis of ImageNet. Fortunately, recent advances in unsupervised learning algorithms  
78 have now enabled effective pre-training and transfer learning without the need for any up front  
79 annotations; in fact, on many tested benchmarks, unsupervised pre-training leads to better  
80 transfer learning performance [32][33][34][35][36][37][38].

81

82 To provide a resource for the EM community to explore these exciting advances, we constructed  
83 an unlabeled cellular EM dataset which we call CEMraw, containing images from 101 unrelated  
84 biological projects. The image data superset, comprising 591 3D image volumes and 9,626 2D  
85 images are collated from a collection of experiments conducted in our own laboratory as well as  
86 data from publicly available sources. After gathering this set of heterogeneous images, we create  
87 a pipeline where we first remove many nearly identical images and then filter out low-quality  
88 and low-information images. This results in a highly information-rich, relevant, and non-  
89 redundant 25 GB image dataset comprising  $0.5 \times 10^6$  images. As a proof of concept for its  
90 potential applications, we pre-trained a DL model on CEM500K using an unsupervised  
91 algorithm, MoCoV2 [39], and evaluated the results for transfer learning on six publicly available  
92 benchmarks and one newly derived benchmark that we introduce in this work. CEM500K pre-

93 trained models significantly outperformed randomly initialized and ImageNet pre-trained  
94 models, as well as previous baseline results from benchmark-associated publications.  
95  
96

## 97 **Results**

98

### 99 *Creation of CEM500K*

100 In order to create an image dataset that is relevant to cellular EM and yet general enough to be  
101 applicable to a variety of biological studies and experimental approaches, we collected 2D and  
102 3D cellular EM images from both our own experiments and publicly available sources. These  
103 included images from a variety of imaging modalities and their corresponding sample  
104 preparation protocols, resolutions reported, and cell types imaged (**Fig. 1 a-c**). We selected “in-  
105 house” datasets corresponding to 251 reconstructed FIB-SEM volumes from 33 unrelated  
106 experiments and 2,975 TEM images from 35 additional experiments. Other data was sourced  
107 externally; as there is currently no central hub for accessing publicly available datasets, we  
108 manually searched through databases (Cell Image Library, Open Connectome Project [40],  
109 EMPIAR [41]), GitHub repositories, and publications. A complete accounting of the datasets  
110 with relevant attribution is detailed in the **Supplementary Materials**. Included in this batch of  
111 data were 340 EM image volumes (some derived from video data) from 26 experiments and  
112 9,792 2D images from 14 other experiments. Among the externally gathered datasets there were  
113 disparate file types (avi, mp4, png, tiff, jpeg, mrc, nii.gz) and pixel/voxel data types (signed and  
114 unsigned, 32-bit float, 8-bit and 16-bit integer) as well as a mixture of image volumes with  
115 isotropic or anisotropic voxels, and regular or inverted intensities. These data were standardized  
116 into 2D tiff images, or patches, of 224 x 224 8-bit unsigned pixels (see Materials and Methods);  
117 the resulting set of  $5.3 \times 10^6$  images constitutes what we term CEMraw (**Fig. 1 d, top**).

118

119 Within CEMraw, however, most images were redundant. Nearly identical patches existed  
120 because of the similarity between adjacent cross-sections in high-resolution 3D volumes as well  
121 as in patches cropped from uniform intensity regions like empty resin. Duplicates are not only  
122 memory and computationally inefficient, but they may also induce undesirable biases toward the  
123 most frequently sampled features in the dataset. Therefore, we aggressively removed duplicates  
124 using an automated algorithm: we calculated and compared image hashes for each patch in  
125 CEMraw and then kept a single, randomly chosen exemplar image from each group of near  
126 duplicates (see Materials and Methods). As a result of this operation, we obtained an 80%  
127 decrease in the number of patches when compared to CEMraw; this “deduplicated” subset of 1.1

128  $\times 10^6$  image patches we refer to as CEMdedup (**Fig. 1 d, middle**). Although it is currently  
129 impossible to determine *a priori* what data will be useful for a model, we expect that this  
130 removal of significant redundancies in the image dataset is unlikely to result in the loss of  
131 meaningful information for DL model training.

132  
133 Deduplication ensures that each image will make a unique contribution to our dataset, but it is  
134 agnostic to the content of the image, which may or may not be relevant to downstream tasks.  
135 Upon visual inspection, it was clear that many of the images in CEMdedup contained little  
136 information useful to the segmentation of organelles or cellular structures, e.g., images  
137 dominated by empty resin, background padding, or homogeneously stained interiors of nuclei or  
138 cytoplasm (**Supplementary Figure 1a**). However, while these images were uninformative for  
139 our purposes, they also represented a wide variety of image features, making them challenging to  
140 identify with simple image statistics. Instead, we separated an arbitrary subset of 12,000 images  
141 from CEMdedup into informative and uninformative classes and trained a DL model to perform  
142 binary classification on the entire dataset. Uninformative images were characterized by poor  
143 contrast, large areas of uniform intensity, artifacts, and the presence of non-cellular objects.  
144 Detailed criteria are given in Materials and Methods. The classifier achieved an area under the  
145 receiver operating characteristic (AUROC) score of 0.962 on a holdout test set of 2,000 images,  
146 as shown in **Supplementary Figure 1b**, suggesting that it could reliably distinguish between the  
147 informative and uninformative image classes. Classification of the remaining unlabeled images  
148 with this model yielded  $0.5 \times 10^6$  patches with a visibly higher density of views containing  
149 organelles and cellular structures. We refer to this final subset of uniquely informative 2D  
150 cellular EM images as CEM500K (**Fig. 1 d, bottom**). Representative patches from the three  
151 datasets (CEMraw, CEMdedup and CEM500K) are shown in **Supplementary Figure 2**.

152  
153 *Test of pre-training by CEM500K*

154 We then decided to test CEM500K for unsupervised pre-training of a DL model, using the  
155 MoCoV2 algorithm, a relatively new and computationally efficient approach [34]. The algorithm  
156 works by training a DL model to match differently augmented (e.g., cropped, rotated, zoomed in,  
157 brightened, etc.) pairs of images. The first batch of augmented images is called the query and the  
158 batch of their differently augmented counterparts is called the key. Before matching, the encoded

159 images in the key are added to a continuously updated queue containing tens of thousands of  
160 recently seen images (**Supplementary Figure 3a**). To be useful for other tasks, it is assumed  
161 that the model will learn features that correspond to relevant objects within the training images.  
162 Recently, models pre-trained on ImageNet with the MoCoV2 algorithm have shown superior  
163 transfer learning performance over supervised methods when applied to a variety of tasks  
164 including segmentation [39]. Before we were able to evaluate the MoCoV2 algorithm on  
165 CEM500K, it was necessary to define a set of downstream tasks to quantify and compare  
166 performance. We chose six publicly available benchmark datasets: CREMI Synaptic Clefts [42],  
167 Guay [15], Kasthuri++ and Lucchi++ [17], Perez [18] and UroCell [16]. The benchmarks  
168 included a total of eight organelles or subcellular structures for segmentation (mitochondria,  
169 lysosomes, nuclei, nucleoli, canalicular channels, alpha granules, dense granules, dense granule  
170 cores, and synaptic clefts). In **Fig. 2a** we show representative images and label maps from the  
171 benchmarks. Additional information about the benchmarks, including imaging techniques and  
172 sizes of the training and test sets, is given in **Supplementary Table 1**.

173  
174 Performance on each benchmark was measured using the standard Intersection-over-Union (IoU)  
175 score. Considered on their own, many of these benchmark datasets are not difficult enough to  
176 expose the gap in performance between different models: they only require the segmentation of a  
177 single organelle within a test set that is often from the same image volume as the training set. At  
178 the same time, they are an accurate reflection of common use cases for deep learning in EM  
179 laboratories where the goal is to segment data from a single experiment in order to support  
180 biological, not computational, research. To address the lack of variety within the benchmark  
181 training and test sets, we derived an additional benchmark that we call All Mitochondria, which  
182 is a combination of the training and test sets from each of the five benchmarks that contain label  
183 maps for mitochondria (Guay, Perez, UroCell, Lucchi++ and Kasthuri++; the labels for all other  
184 objects were removed). Although this benchmark is specific to a single organelle, it is  
185 challenging in that it requires a model to learn features that are general for mitochondria from  
186 image volumes generated independently and from unrelated experiments and imaging  
187 parameters.

188

189 Our overall pre-training, fine-tuning, and evaluation workflow is shown in a schematic in **Fig.**  
190 **2b**. Pre-training was performed by applying the MoCoV2 algorithm to learn parameters for a  
191 ResNet50 [43] before transferring the parameters into the encoder of a U-net [44]. A detailed  
192 schematic of the UNet-ResNet50 architecture is shown in **Supplementary Figure 3b**. For this  
193 section, once transferred, the parameters were frozen such that no updates were made during  
194 fine-tuning on the benchmark tasks; this enabled us to isolate the effects of pre-training from the  
195 effects of fine-tuning. As a simple baseline reference for calibrating later results, we started by  
196 measuring the performance of the proposed segmentation model with randomly initialized and  
197 frozen encoder parameters (i.e., we skipped the pre-training step in the workflow); the results for  
198 each benchmark are shown **Fig. 2c**. Given that in our architecture, the encoder includes  
199 approximately  $23 \times 10^6$  parameters and the decoder approximately  $9 \times 10^6$  parameters, some 70%  
200 of the model's parameters were never been updated during training. Still, some benchmarks  
201 permit strikingly good performance, with IoU scores of over 0.75 on both Lucchi++ and  
202 Kasthuri++. These results emphasize the necessity of evaluating deep learning algorithms and  
203 pre-training datasets on multiple benchmarks before drawing conclusions about their quality.

204  
205 We next tested the influence of our curation pipeline on the quality of pre-trained parameters.  
206 We pre-trained models on the CEMraw, CEMdedup CEM500K with an abbreviated training  
207 schedule (see Materials and Methods) and compare the IoU scores achieved on the benchmarks  
208 in **Fig. 2d** (the actual IoU scores are shown in **Table 1**). We observed that pre-training on the  
209 CEM500K gave better or equivalent results than the CEMraw superset and CEMdedup subset  
210 for every benchmark. The average increase in performance of CEM500K over CEMraw was  
211 4.5%, and CEM500K over CEMdedup was 2.0%, with a maximum increase of 12.3% and 4.1%,  
212 respectively, on the UroCell benchmark (IoU scores increased from 0.652 and 0.699 to 0.729).  
213 These increases are significant. As a comparison, a 2% increase in model performance is similar  
214 in magnitude to what might be expected from using an ensemble of a few models [45]. Besides  
215 these gains, curation is valuable for reducing the computational cost of using CEM500K: the  
216 final filtered subset is 90% smaller than the raw superset (25 GB compared to 250 GB).  
217 Deduplication and filtering likely contributed to the performance gain by enabling both faster  
218 convergence and the learning of more relevant feature detectors. Duplicate images consume  
219 training iterations without presumably transmitting any new information, resulting in slower



220 learning. Uninformative images, on the other hand, may guide a model to discover discriminative  
221 features that are useless for most segmentation tasks. For example, a model must learn feature  
222 detectors that can distinguish between images of empty resin in order to succeed on the pre-  
223 training task, but those feature detectors are unlikely to help with a common task like  
224 mitochondrial segmentation. Therefore, eliminating uninformative images may reduce the  
225 learning of irrelevant details during pre-training.

226

227 We also posited that, in addition to the benefits of curation, the heterogeneity of examples in  
228 CEM500K would be essential for achieving good segmentation performance across disparate  
229 biological contexts. To test this, we considered an alternative pre-training dataset consisting  
230 exclusively of  $1 \times 10^6$  images from a single large connectomics volume of mouse brain tissue  
231 (Bloss et al., 2018) [46]. Coming from a single volume of a highly homogeneous tissue type,  
232 images in this dataset show much less variation in cellular features than those in CEM500K (a  
233 random sampling of images is shown in **Supplementary Figure 4**). The size of the volume and  
234 the density of its content allowed us to sparsely sample patches without the need for  
235 deduplication and filtering.

236

237 Compared to the Bloss pre-training dataset, CEMraw, CEMdedup and CEM500K all  
238 demonstrated significantly higher performance on four of the seven benchmarks, as shown in  
239 **Fig. 2e** (the actual IoU scores are shown in **Table 1**). The average increase in IoU scores from  
240 the Bloss baseline to CEM500K over these 4 benchmarks was 9.1%, with a maximum of 13.8%  
241 for the UroCell benchmark (increase in IoU score from 0.638 to 0.729). Tellingly, the 3  
242 benchmarks on which Bloss pre-trained models performed comparably well (Kasthuri++,  
243 Lucchi++ and Perez) were the only benchmarks that exclusively contained images from mouse  
244 brain tissue, like the Bloss dataset itself. This apparent specificity for images from the same  
245 organism and tissue type may indicate that the models learn to represent elements of the  
246 underlying biology or tissue architecture. Alternatively, it may reflect similarities in the image  
247 acquisition and sample preparation protocols, though the plausibility of this explanation is  
248 unlikely, given that each benchmark dataset was imaged with different, albeit broadly similar,  
249 technologies (Bloss with serial section TEM; Kasthuri++ with ATUM-SEM; Lucchi++ with  
250 FIB-SEM; Perez with SBF-SEM). It is clear that pre-training on large but biological narrow

251 datasets is insufficient for learning general-purpose features that apply equally well across a  
252 broad spectrum of contexts. To guard against potential biases our results instead suggest that the  
253 pre-training dataset ought to include image examples from as many different tissues, organisms,  
254 sample preparation protocols, and EM techniques as possible. Furthermore, a set of diverse  
255 benchmark datasets is essential for identifying such biases when they do arise.

256

257 *CEM500K models are largely impervious to meaningful image augmentations*

258 Having established CEM500K as the EM dataset for pre-training and transfer learning, we  
259 investigated the qualities of the model pre-trained by the MoCoV2 algorithm on CEM500K and  
260 compare it to a model pre-trained by the MoCoV2 algorithm on ImageNet (IN-moco). We note  
261 that unlike the abbreviated training used to evaluate pre-training on various subsets of CEM, here  
262 we trained the model for the complete schedule, and henceforth refer to the fully trained model  
263 as CEM500K-moco. In general, good DL models have neurons that are both robust to distortions  
264 and are selective for particular features [47]. In the context of EM images, for example, a good  
265 model must be able to recognize a mitochondrion as such irrespective of its orientation in space,  
266 its size, or some reasonable variation in resolution of its membrane. On the other hand, the same  
267 model must also be able to discern mitochondria, no matter how heterogeneous, from a variety of  
268 other organelles or cellular features. First, we attempted to evaluate the robustness of CEM500K-  
269 moco neurons by measuring their invariances to transformations of input images. Specifically,  
270 we considered the average activations of the 2,048 neurons in the last layer of the ResNet50s'  
271 encoders, pre-trained by either CEM500k-moco or IN-moco, to input images. Broadly following  
272 the approach detailed in Goodfellow et al [47] we defined invariance based on the mean firing  
273 rates of neurons in response to distortions of their inputs. Plots showing changes in mean firing  
274 rates with respect to rotation, Gaussian blur and noise, brightness, contrast and scale are shown  
275 in **Fig. 3a**. These six transforms that we choose account for much of the variation observed  
276 experimentally in cellular EM datasets, and we expect that models in which many neurons are  
277 invariant to these differences would be better suited to cellular EM segmentation tasks.

278

279 We observed that neurons in CEM500K-moco models had consistently stronger invariance to all  
280 tested transformations (**Fig. 3a**). The two exceptions were a reduction in invariance when  
281 contrast was very high and a smaller reduction when scale factors were very large (**Fig. 3a, v**

282 **and vi, respectively**). First, with regards to rotation, virtually all the neurons in the CEM500K-  
283 moco model were remarkably invariant to rotation compared to about 70% of the neurons in the  
284 IN-moco model, reflecting the fact that orientation matters for representing images in ImageNet  
285 but, appropriately, not for CEM500K. Next, neurons in the CEM500K-moco model fire more  
286 consistently when presented with increasingly blurry and noisy images, in both cases falling off  
287 significantly later as compared to IN-moco, when, presumably, meaningful information in the  
288 images has been lost. Further, while both of the tested pre-trained models responded comparably  
289 to increasing image brightness, the CEM500K-moco model had a noticeably greater invariance  
290 to both more brightened and more darkened images. For contrast adjustments, there was a similar  
291 robustness to decreased contrast. This was indicative of the distribution of images in CEM500K,  
292 and cellular EM data more broadly: very low-contrast images are common, very high-contrast  
293 images are not. On the other hand, the gap between CEM500K-moco and IN-moco pre-trained  
294 models in the high-contrast regime not only reinforce this observation but also suggest more  
295 relevant learning by the former. CEM500K-moco neurons show an invariance to a  
296 transformation only insofar as that transformation mimics real variance in the data distribution,  
297 and the firing rate decreases when the high contrast becomes no longer plausible. Similarly, there  
298 is some evidence that the results for scale invariance follow the same logic. In CEM500K, the  
299 most common reported image pixel sampling was 15-20 nm and the highest was 2 nm. Extreme  
300 scaling transformations (greater than 5x) would exceed the limits of features commonly sampled  
301 in CEM500K, rendering invariance to such transformations useless. We expect that the superior  
302 robustness to variations in cellular EM data baked into CEM500K-moco should simplify the  
303 process of adjusting to new tasks. For example, when fine-tuning a U-Net on a segmentation  
304 task, the parameters in the decoder will receive a consistent signal from the pre-trained encoder  
305 regardless of the orientation and other typical variations of the input image, presumably easing  
306 the learning burden on the decoder. For the same reason, we expect models to gain robustness to  
307 rare and random events such as artifacts generated during image acquisition.

308

### 309 *CEM500K models learn biologically relevant features*

310 Next, we assessed selectivity for objects of interest, that is, do these models learn something  
311 meaningful from cellular EM images? We created feature maps by appropriately upsampling the  
312 activations of each of the 2,048 neurons in the last layer of the pre-trained ResNet50 and

313 correlated these maps to the ground truth segmentations for three different organelles. In **Fig. 3b**,  
314 activations of the 32 neurons most positively correlated with the presence of the corresponding  
315 organelle were averaged, scaled from 0-1 (displayed as a heatmap), and then binarized with a  
316 threshold of 0.3 (displayed as a binary mask). We observed that these derived heatmaps from the  
317 CEM500K-moco model shared a higher correlation with the presence of an organelle than  
318 features from the equivalent IN-moco model, irrespective of whether the organelle interrogated  
319 was ER, mitochondria, or nucleus. For the CEM500K-moco model, Point-Biserial correlation  
320 coefficients were 0.418, 0.680, and 0.888 for ER, mitochondria, and nucleus compared to 0.329,  
321 0.608, and 0.803 for the IN-moco model. The segmentations created by binarizing the mean  
322 responses also have a greater IoU with ground truth segmentations (CEM500K-moco: 0.284,  
323 0.517, and 0.887 for ER, mitochondria, and nucleus; IN-moco: 0.208, 0.325, and 0.790,  
324 respectively) for the model. Unexpectedly, features learned from ImageNet displayed some  
325 selectivity for mitochondria and nuclei, emphasizing the surprising transferability of features to  
326 domains that are seemingly unrelated to a model's training dataset. Nevertheless, it is clear that  
327 relevant pre-training, as is the case with CEM500K-moco, results in the model learning features  
328 that are meaningful in a cell biological context. The link between these results and the  
329 subsequent model's performance on downstream segmentation tasks is self-evident.

330  
331 Pre-training on CEM500K encouraged the learning of representations that encode information  
332 about organelles. We analyzed how the model completed the MoCoV2 training task of matching  
333 differently transformed views of the same image. We first generated two different views of the  
334 same image by taking random crops and then randomly rescaling them. Then we took one of the  
335 images in the pair and sequentially masked out small squares of data and measured the dot  
336 product similarity between the model's output on this occluded image and its output on the other  
337 image in the pair. Using this technique, called occlusion analysis, we were able to detect the  
338 areas in each image that were the most important for making a positive match [48]. Results are  
339 displayed as heatmaps overlaid on the occluded image (**Fig. 3c**), and show, importantly, that  
340 without any guidance, the model spontaneously learned to use organelles as "landmarks" in the  
341 images, visible as "hot spots" around such features. This behavior mirrors how a human  
342 annotator would likely approach the same problem: identify a prominent object in the first image  
343 and look for it in the second image. That these prominent objects should happen to be organelles

344 is not coincidental as sample preparation protocols for electron microscopy are explicitly  
345 designed to accentuate organelles and membranes relative to other content. Thus, representations  
346 learned by CEM500K-moco pre-training display robustness to EM-specific image variations and  
347 selectivity for objects of interest, demonstrating that they should be well-suited to any  
348 downstream segmentation tasks.

349  
350 With this understanding for how a model pre-trained with MoCoV2 on an EM-specific dataset  
351 might confer an advantage for EM segmentation tasks as compared to similar pre-training on a  
352 natural image dataset (ImageNet), we quantified this advantage by evaluating IoU improvements  
353 across the benchmark datasets. In addition to the CEM500K-moco and IN-moco pre-trained  
354 encoders we also considered two alternative parameter initializations: ImageNet Supervised (IN-  
355 super)[34] and, as a baseline, random initialization. In contrast to results in Fig. 2c, all encoder  
356 parameters for randomly initialized models were updated during training. Pre-trained models, as  
357 before, had their encoder parameters frozen to assess their transferability.

358  
359 *Fully trained CEM500K models achieve state-of-the-art results on EM benchmarks*

360  
361 Results showing the measured percent difference in IoU scores against random initialization are  
362 shown in **Fig. 4a**. For each benchmark, we applied the number of training iterations that gave the  
363 best performance for CEM500K-moco pre-trained models (see **Table 2**). Across the board,  
364 CEM500K-moco was the best initialization method with performance increases over random  
365 initialization ranging from 0.5% on the Lucchi++ benchmark to a massive 63% on UroCell; the  
366 mean improvement (excluding CREMI Synaptic Clefts) was 27%. The baseline random  
367 initialization IoU score on the CREMI Synaptic Clefts benchmark was 0.000, making any %  
368 measurements of performance improvements meaningless. For ease of visualization, we assigned  
369 an IoU score of 0.2 for this dataset and calculated improvements based off of this score. Example  
370 2D and 3D segmentations on the UroCell benchmark test set are shown in **Fig. 4b**; we also  
371 display representative segmentations for selected labelmaps from all of the 2D-only benchmarks  
372 in **Fig. 4c**. On the UroCell test set, all of the initialization methods except CEM500K-moco  
373 failed to accurately segment mitochondria in an anomalously bright and low-contrast region  
374 (example marked by a black arrow in Fig. 4b). Indeed, CEM500K-moco also correctly identified

375 features that the human annotator appears to have missed (example of missed mitochondrion, red  
376 arrow in Fig. 4c). On average, IN-super and IN-moco achieved 6.6% and 7.8% higher IoU scores  
377 than random initialization, respectively. Parameters pre-trained with the unsupervised MoCoV2  
378 algorithm thus appear to generalize better to new tasks than parameters pre-trained on the  
379 ImageNet supervised classification task [34]. Crucially, the 16% average increase in IoU scores  
380 from CEM500K-moco over IN-moco reveals the advantage of pre-training on a domain-specific  
381 dataset. Thus, while it is clear that some of CEM500K-moco's improvement over random  
382 initialization is explained by pre-training with the MoCoV2 algorithm in general, most of the  
383 improvement comes from the characteristics of the pre-training data.

384

385 In addition to better IoU performance, pre-trained models converged more quickly. We found  
386 that models pre-trained with the MoCoV2 algorithm converged the fastest (**Fig. 4d, top**). Within  
387 just 500 iterations, these models reach over 90% of their performance at 10,000 training  
388 iterations, and within only 100 iterations, they achieve over 80%. For context, 100 iterations on  
389 the hardware used here with an Nvidia P100 GPU required less than 2 minutes per model,  
390 making this approach more feasible for resource limited work. We posit that the faster training  
391 associated with the MoCoV2 algorithm stems from the much lower magnitudes of feature  
392 activations, as observed in [32], which facilitates training with higher learning rates. CEM500K-  
393 moco models trained marginally faster than IN-moco models. This speedup may have stemmed  
394 from CEM500K-moco's better robustness to the chosen data augmentations, reducing variance  
395 in the feature maps received by the trainable U-Net decoder. Overall, these results suggest a  
396 suitability of CEM500K-moco models for applications where rapid turnarounds for, say, a  
397 roughly accurate segmentation may be desired. In cases where more accurate segmentations are  
398 required, faster training as we see in **Fig. 4d** reduces the amount of time needed for  
399 hyperparameter optimization.

400

401 Finally, the plot of average IoU scores over a range of training iterations showed that the  
402 performance of randomly initialized models leveled off after 5,000 iterations, **Fig. 4d, bottom**.  
403 Previously, it has been observed that granted enough time to converge, randomly initialized  
404 models can often achieve comparable results to pre-trained models [49], and we did observe this  
405 for the easiest benchmarks (Perez, Lucchi++, and Kasthuri++, data not shown). After 30,000

406 iterations of training on these benchmarks, the performance of randomly initialized models  
407 effectively reached parity with CEM500K-moco models. However, for the hard benchmarks,  
408 randomly initialized models never reached the average IoU scores measured at even just 500  
409 training iterations for CEM500K-moco models. ImageNet pre-trained models, on the other hand,  
410 had the lowest average IoUs on easy benchmarks, but were better than random initialization for  
411 hard benchmarks. All of these observations align with expectations. Pre-trained models with  
412 frozen encoders only have  $9 \times 10^6$  parameters to fit to the data. On easy benchmarks where  
413 overfitting is not a concern, this reduction in trainable parameters hurt ImageNet pre-trained  
414 models, but not CEM500K-moco models, since the latter were already pre-trained to EM data.  
415 On hard benchmarks, the regularization effects of having fewer trainable parameters are an  
416 advantage. Randomly initialized models continued to decrease training loss on hard benchmarks,  
417 yet those gains did not translate to increases in test set IoU, a signature of overfitting (data not  
418 shown). Overfitting may be avoided by smaller models with fewer trainable parameters, similar  
419 to the pre-trained models, however this would require costly and slow additional engineering and  
420 hyperparameter optimization for each benchmark. Our results show that regardless of whether  
421 benchmarks are easy or hard, CEM500K-moco pre-trained models trained the fastest and  
422 achieved the best IoU scores. Indeed, these models outperformed the customized algorithms and  
423 training schemes presented as baselines for 4 of the benchmarks that we tested (by 5.8% on  
424 Guay, 8.6% on Kasthuri++, 1.2% on Lucchi++, and 10% on Perez), see **Table 2**. The All  
425 Mitochondria benchmark is a newly derived dataset and therefore has not been previously  
426 evaluated, but we show that it is a relatively challenging benchmark and suggest its use as a  
427 baseline for future comparisons. The remaining two benchmarks (CREMI Synaptic Clefts and  
428 UroCell) used special evaluation methods that were incompatible with our work (see Materials  
429 and Methods); instead, we present a representative visual comparison of our best results with  
430 those from the UroCell publication (**Supplementary Figure 5**) showing a marked improvement  
431 in mitochondria (blue) and lysosome (red) 3D reconstructions. While ImageNet pre-trained  
432 models are broadly useful, our results show that for some EM segmentation tasks they perform  
433 worse than random initialization. For all the available benchmarks and the newly derived All  
434 Mitochondria benchmark, CEM500K-moco pre-training uniformly performed better than the  
435 current alternatives and we demonstrate here its reliability and effectiveness for EM-specific  
436 transfer learning.

437

438



## 439 Discussion

440

441 CEM500K is a diverse, relevant, information-rich, and non-redundant dataset of unlabeled  
442 cellular EM images designed expressly to aid in the development of more robust and general DL  
443 models. Above all, two features distinguish CEM500K from other larger, publicly available EM  
444 datasets that make it superior for DL applications. First, it is derived from a far greater variety of  
445 tissue types, experimental conditions and imaging techniques, resulting in models with less bias  
446 toward such specific variables. Second, it is condensed by aggressively deleting redundant and  
447 uninformative images; this improves model performance and renders CEM500K more accessible  
448 to users. By evaluating on seven benchmarks that represent different segmentation tasks and  
449 biological contexts, we demonstrate that, on average, models pre-trained on CEM500K  
450 performed better than those pre-trained on a dataset extracted from a single large EM volume  
451 (Bloss). Remarkably, the targeted removal of 90% of the images from the original corpus of data  
452 to generate CEM500K returned a significant increase in the quality of pre-trained parameters as  
453 measured by segmentation IoU scores.

454

455 This raises the question of what the nature and extent of dataset curation should be: If a target  
456 segmentation task contains data from a particular biological context, should the pre-training  
457 dataset be curated specifically for that context? And would pre-training on the task data alone  
458 result in adequate models? Our results suggest that the benefits from curating the pre-training  
459 dataset for a particular context are minimal. Pre-training exclusively on images of mouse brain  
460 tissue (Bloss) did not improve performance over CEM500K on benchmarks from that same  
461 tissue (see **Fig. 2e**). The effect of pre-training exclusively on images from a target dataset (say,  
462 for a segmentation task) is unclear – in our case, it was impossible to fairly measure pre-training  
463 on any of the individual benchmark datasets. The MoCoV2 algorithm requires a training dataset  
464 with tens of thousands of images (65,536 in our experiments), many more than any of the  
465 benchmark datasets at our disposal. We speculate that as dataset size decreases, it becomes more  
466 likely that a model will overfit to the pre-training task and learn image features that are irrelevant  
467 for other downstream tasks [50][51]. Other unsupervised pre-training algorithms that work for  
468 smaller datasets and/or larger benchmark datasets would be needed to determine the appropriate  
469 curation approach.

470

471 Regardless, we have shown here that parameters trained on CEM500K are a strong and general-  
472 purpose starting point for improving downstream segmentation models. U-Nets pre-trained on  
473 CEM500K significantly outperformed randomly initialized U-Nets on all of the segmentation  
474 benchmarks that we tested, with the largest improvements corresponding to the most difficult  
475 benchmarks. Impressively, such pre-trained models achieved state-of-the-art IoU scores on all  
476 benchmarks for which comparison with previous results was possible. The only variables tuned  
477 were the number of training iterations and data augmentations. Use of CEM500K pre-trained  
478 models by the EM community may reveal that further tuning of hyperparameters or unfreezing  
479 of the U-Net's encoder parameters could further boost performance.

480

481 Our work focused on the application of CEM500K for transfer learning. This decision was  
482 informed by the current status of DL research for cellular EM, where, typically, segmentation  
483 tasks are performed by models trained on a few labeled examples [21][15][18][16][17][42]. In  
484 general, pre-trained parameters have been shown to guide downstream models to converge to  
485 more general optima than they would from random initialization [27][52][53]. As the number of  
486 examples in the training dataset increases the generalization benefits from transfer learning start  
487 to diminish (gains in training speed are retained)[54][49]. Therefore, while unsupervised pre-  
488 training on CEM500K for transfer learning has demonstrably high utility for the common  
489 paradigm of “train on labeled ROIs / infer labels for the whole dataset”, currently it cannot solve  
490 the problem of creating general segmentation models that reliably segment features of interest  
491 for data generated by novel experiments. However, using CEM500K as seed data provides a path  
492 forward for tackling this much more difficult challenge. With  $0.5 \times 10^6$  uniquely informative  
493 images representing approximately six hundred 3D and ten thousand 2D images corresponding  
494 to more than 100 completely unrelated biological projects, CEM500K is to our knowledge the  
495 most comprehensive and diversified resource of cellular EM images. Annotating images from  
496 CEM500K (or identifying them as negative examples) will enable the creation of new task-  
497 specific training datasets with substantially more variety than previously available. Models  
498 trained on such datasets will likely be better equipped to handle data from new microscopes,  
499 biological contexts, and sample preparation protocols. Moreover, each image chosen for  
500 annotation from CEM500K is likely to be uniquely informative for a model because of the

501 extensive deduplication and filtering pipeline that we have created and used here, and which we  
502 share for future work by the community.

503  
504 The available benchmark datasets that we chose are a reflection of common applications of DL  
505 to cellular EM data, but they do not cover the full scope of possible segmentation tasks. In  
506 particular, all but one of the benchmarks involved the annotation of mitochondria and three of  
507 the seven were from mouse brain tissue. We observed that benchmark variety is essential to  
508 identify biases in pre-trained parameters and that difficult tasks are a necessary and stringent test  
509 of pre-training algorithms or datasets. For example, visual inspection of the label maps in **Fig. 4c**  
510 makes it obvious that our results leave little room for improvement on relatively easy (and 2D  
511 only) benchmarks like Lucchi++, Kasthuri++, and Perez, suggesting that going forward, new and  
512 more challenging benchmarks will be required.

513  
514 Additionally, we only tested semantic and not instance segmentation (i.e. all objects from one  
515 class share one label). We made this decision in order to avoid the more complex model  
516 architectures, postprocessing and hyperparameters that usually accompany instance segmentation  
517 [55][56][20]. Focusing on simple end-to-end semantic segmentation tasks emphasizes the effects  
518 of pre-training and eliminates the possibility that non-DL algorithms could confound the  
519 interpretation of our results. Applying pre-training for instance segmentation, an important and  
520 common task in cellular EM connectomics research, would require extension to 3D models. We  
521 chose to operate in 2D for practical reasons. 2D models work well for semantic segmentation in  
522 both 2D and 3D (our 2D models beat the state-of-the-art results set by 3D models on some of the  
523 benchmarks, see **Table 2**), whereas 3D models cannot be applied to 2D images. From a  
524 computational standpoint, 2D models have far fewer parameters than their 3D counterparts and  
525 run efficiently on a single GPU; these savings are particularly valuable for laboratories with  
526 limited access to high performance computing resources. Therefore, at this current moment, we  
527 believe that 2D pre-trained parameters are the most broadly useful for cellular EM researchers.  
528 Unsupervised pre-training on 3D data is currently an underexplored research area, although in  
529 principle, there is no reason why an algorithm like MoCoV2 should not work in 3D if a  
530 sufficiently large dataset can be constructed.

531

532 The goal of this work is to begin the process of creating a data ecosystem for cellular EM images  
533 and datasets. CEM500K will be a valuable resource for experimenting with and taking advantage  
534 of the latest developments in DL research, where access to troves of image data is usually taken  
535 for granted. To further increase its utility, more data from uncommon organisms, tissue and cell  
536 types, sample preparation protocols and acquisition parameters will be needed. In the current  
537 state, the dataset is still heavily skewed to a few common organisms like mice and tissues like  
538 brain, and it is clear that there is much room for greater sampling and heterogeneity  
539 (**Supplementary Figure 6**). We hope that other researchers will consider using the curation tools  
540 that we developed in this work to contribute to CEM500K. The massive reduction in dataset size  
541 from curation makes the sharing of data relatively quick and easy; moreover, the elimination of  
542 3D context from volume EM datasets ensures that the shared data can only reasonably be used  
543 for DL applications. Similar to pre-training on natural images, we expect that the quality of the  
544 pre-trained parameters for transfer learning will improve logarithmically as CEM500K grows  
545 [57]. In the meantime, the pre-trained parameters that we release here can serve as the foundation  
546 for rapidly prototyping and building more general segmentation models for cellular EM data.

547

## 548 **Acknowledgments**

549

550 We thank the creators of the benchmarks and other datasets for making the image data freely  
551 available to the community. We thank Patrick Friday for help with running some of the models  
552 described herein, members of the CMM for contributing EM images, and FNL and NCI  
553 colleagues for critical comments on this manuscript. This work utilized the computational  
554 resources of the NIH HPC Biowulf cluster (<http://hpc.nih.gov>). This project has been funded in  
555 whole or in part with Federal funds from the National Cancer Institute, National Institutes of  
556 Health, under Contract No. 75N91019D00024. The content of this publication does not  
557 necessarily reflect the views or policies of the Department of Health and Human Services, nor  
558 does mention of trade names, commercial products, or organizations imply endorsement by the  
559 U.S. Government.

560

561

562

## 563 **Methods**

564

### 565 Dataset standardization

566

567 Datasets generated from microscopes in our lab were already in the desired standardized format:  
568 8-bit unsigned volumes or 2D tiff images. Publicly available EM data are in a variety of file  
569 formats and data types; these datasets were individually reformatted as needed to match the  
570 formatting of our internal datasets. Importantly, data from each of the seven benchmarks we  
571 tested were included as well but comprised less than 0.1% of the dataset. To reduce the memory  
572 requirements of large 3D volumes, datasets were downsampled such that no individual dataset  
573 was larger than 5GB (affecting only 7 of the total 591 image volumes). The majority of 3D  
574 datasets included metadata of their image resolutions; isotropic and anisotropic volumes were  
575 thus automatically identified and processed differently. For all isotropic voxel data and for any  
576 anisotropic voxel data in which the z resolution was less than 20% different from the x and y  
577 resolutions, 2D cross-sections from the xy, xz, and yz planes were sequentially extracted.  
578 Anisotropic voxel data with a greater than 20% difference in axial versus lateral resolutions were  
579 only sliced into cross-sections in the xy plane. At this point, all of the gathered image data was in  
580 the format of 2D tiff images, though with variable heights and widths. These images were  
581 cropped into 224x224 patches without any overlap. If the image's width or height was not a  
582 multiple of 224, then crops from the remaining area were discarded if either of their dimensions  
583 were less than 112.

584

585 Separately, additional 2D images available through the Open Connectome Project were  
586 collected. As these volumes were too large to reasonably download and store (tens of TB), Cloud  
587 Volume API was used to randomly sample 1,000 2D patches from the xy planes of each  
588 available dataset. These extracted patches were already of the correct size and format, therefore  
589 no further processing was required. This corpus of  $5.3 \times 10^6$  2D patches constitutes "CEMraw".  
590 Certain datasets were not accessible with this method and were therefore not included in the final  
591 version of CEMraw (see Supplementary Materials). The "Bloss baseline" dataset [46] was also  
592 extracted and generated with this method; however,  $1 \times 10^6$  patches were collected from that

593 single data volume to roughly match the number of images in CEMraw (Supplementary Figure  
594 4).

595

596 Deduplication

597

598 To remove duplicate patches, image hashes for all  $5.3 \times 10^6$  images in CEMraw were calculated.  
599 Difference hashes gave the best results of all the hashing algorithms tested [58]. A hash size of 8  
600 results in a 64-bit array to encode each  $224 \times 224$  image. The similarity of two images was then  
601 measured by the Hamming distance between their hashes. A pairwise comparison of all  $5.3 \times 10^6$   
602 hashes was not computationally feasible or meaningful. Instead, hashes belonging to the same  
603 2D or 3D source dataset were compared. For a 64-bit hash, distances range from 0 to 64. Sets of  
604 hashes with a distance  $< 12$  (distance cutoff chosen by visual inspection of groups) between them  
605 were considered a group of near-duplicates. All but one randomly chosen image from each group  
606 were dropped (Fig. 1b). Together, the resulting  $1.1 \times 10^6$  images constitute a deduplicated dataset  
607 or “CEMdedup”.

608

609 Uninformative Patch Filtering

610

611 A random subset of 14,000 images from CEMdedup were manually labeled either informative or  
612 uninformative. The criteria for this classification process were informed by the hyperparameters  
613 of the MoCoV2 pre-training algorithm, which takes random crops as small as 20% of an area of  
614 an image. For an image that is only 20% informative, there is a 30% chance that such a randomly  
615 drawn crop will be completely uninformative, and this fraction increases exponentially for  
616 images less than 20% informative (**Supplementary Figure 7**). Therefore 20% was chosen as the  
617 cutoff for manual labeling. Concretely, this means that images with 80% or more of their area  
618 occupied by uniform intensity structures like nuclei, cytoplasm, or resin are classified as  
619 uninformative. Other criteria included whether the image was low-contrast, displayed many  
620 artifacts, or contained non-cellular objects as determined by a human annotator. A breakdown of  
621 the frequency of traits present in a subset of uninformative patches is shown in **Supplementary**  
622 **Figure 1a**.

623

624 2,000 labeled images were set aside as a test set and the remaining 12,000 were used as training  
625 data for a model classifier: a ResNet34 pre-trained on ImageNet. The fourth layer of residual  
626 blocks and the classification head of the model were fine-tuned for 30 epochs on a P100 GPU  
627 with the Adam optimizer and a learning rate of 0.001. A Random Forest classifier trained on four  
628 image-level statistics (the standard deviations of the local binary pattern [59] and image entropy,  
629 the median of the geometric mean, and the mean value of a canny edge detector [60]) was also  
630 tested. These features were chosen from a larger superset based on their measured importance.  
631 The performance for the two classifiers is shown in **Supplementary Figure 1b**. The DL model  
632 was used to create CEM500K with a confidence threshold set at 0.5.

633

#### 634 Momentum Contrast Pre-training

635

636 For unsupervised pre-training, the Momentum Contrast (MoCoV2) algorithm [31, 32] was used.  
637 A schematic of a single step in the algorithm is shown in Supplementary Figure 3a. Pre-training  
638 was completed on a machine with 4 Nvidia V100 GPUs using a batch size of 128 and queue  
639 length of 65,536. The initial learning rate was set to 0.015 and divided by 10 at epochs 120 and  
640 160. In addition, 360° rotations and Gaussian noise with a standard deviation range of  $1 \times 10^{-5}$  to  
641  $1 \times 10^{-4}$  were added to the data augmentations. All other hyperparameters and data augmentations  
642 were left as the defaults presented in [32]. For pre-training comparisons between different EM  
643 datasets, i.e. the three subsets of CEM plus Bloss (**Fig. 2d, e**),  $4.5 \times 10^5$  total parameter updates  
644 (iterations) were run for each model, which is equivalent to 120 passes (epochs) through all the  
645 images in CEM500K. The average training time for each of these models was 2.5 days. The final  
646 pre-trained parameters generated for results shown in **Fig. 4b, c** were trained on CEM500K for  
647 an additional 80 epochs: a total of 200 epochs and 4 days of training.

648

#### 649 U-Net Segmentation Architecture

650

651 Our implementation was similar to the original implementation of the U-Net, except that the  
652 encoder was replaced with a ResNet50 model (**Supplementary Figure 3b**). When using pre-  
653 trained models in these experiments all parameters in the encoder were frozen such that no  
654 updates were made during training. Randomly initialized encoders were tested with both frozen

655 and unfrozen parameters. The random number generator seed was fixed at 42 such that any  
656 randomly initialized parameters in either the U-Net encoder or decoder would be the same in  
657 every experiment.

658

## 659 Benchmark Segmentation Tasks

660

661 The One Cycle Policy and AdamW optimizer with maximum learning rate 0.003, weight decay  
662 0.1, batch size 16, and (binary) cross entropy loss were used for all benchmarks [61][62]. For the  
663 Guay and Urocell benchmarks, which required multiclass segmentation, the cross-entropy loss  
664 was weighted by the prevalence of each class; this yielded better IoU scores. Classes that  
665 accounted for less than 10% of all pixels in the dataset were given a weight of 3, those that  
666 accounted for more than 10% were given a weight of 1, and all background classes were given a  
667 weight of 0.1. Data augmentations included randomly resized crops with scaling from 0.08 to 1  
668 and aspect ratio from 0.5 to 1.5, 360° rotations, random 30% brightness and contrast  
669 adjustments, and horizontal and vertical flips. For the Guay benchmark, and consequently the All  
670 Mitochondria benchmark, Gaussian Noise with a variance limit of 400 to 1200 and Gaussian  
671 Blur with a maximum standard deviation of 7 were also added. The decision to add more data  
672 augmentations for these benchmarks was made in response to observed overfitting on the Guay  
673 benchmark validation dataset. Lastly, different crop sizes were used for each benchmark: 512 x  
674 512 for Guay, CREMI, Synaptic Cleft, Kasthuri++ and Lucchi++, 480 x 480 for Perez, and 224 x  
675 224 for UroCell and All Mitochondria.

676

677 To create 3D segmentations for the UroCell, Guay, and CREMI Synaptic Cleft test sets we used  
678 either orthoplane or 2D stack inference following [63]. Briefly, in 2D stack inference the model  
679 only makes predictions on xy cross-sections; in orthoplane inference, the model makes  
680 predictions on xy, yz, and xz cross-sections and the confidence scores are averaged together.  
681 Orthoplane inference was used for the UroCell test set because its test volume has isotropic  
682 voxels. Because both the Guay and CREMI Synaptic Cleft test volumes are anisotropic we used  
683 2D stack inference instead.

684



685 Evaluation generally followed the details given in the publication that accompanied the  
686 benchmark. First, test images in the Perez datasets did not have labels for all instances of an  
687 object e.g. only 1 nucleus was labeled in an image containing 2 nuclei. To circumvent this  
688 problem, we ignored areas in the predicted segmentations that did not coincide with a labeled  
689 instance in the ground truth. Second, the UroCell benchmark was evaluated in previous work by  
690 averaging K-Fold cross-validation results on 5 unique splits of the 5 training volumes such that  
691 each training volume was used as the test set once. The authors also excluded pixels on the  
692 boundary of object instances both when training and when calculating the prediction's IoU with  
693 ground truth. Here, a simpler evaluation was run on a single split of the data with 4 volumes used  
694 for training and 1 volume used for testing. To eliminate small regions of missing data we  
695 cropped 2 of the 5 volumes along the y axis (fib1-0-0-0.nii.gz, the test volume, by 12 pixels and  
696 fib1-1-0-3.nii.gz by 54 pixels). Third, for the CREMI Synaptic Cleft benchmark the training and  
697 test datasets did not have an official evaluation metric, and the ground truth segmentations were  
698 not publicly available. Therefore, volumes A and B were used exclusively for training and IoU  
699 scores were evaluated on volume C.

700

#### 701 Mean Firing Rate

702

703 Following [47] neuron firing thresholds were determined by passing 1,000 images of randomly  
704 sampled noise through each pre-trained ResNet50 model and calculating the 99<sup>th</sup> percentile of  
705 responses. In our experiments, only the neurons in the output of the global average pooling layer  
706 were considered such that there were 2,048. Responses to 100 randomly selected images from  
707 CEM500K were then recorded over a range of distortion strengths. For each neuron, the set of  
708 undistorted images that activated the neuron near maximally (over the 90<sup>th</sup> percentile), called Z,  
709 was determined. A set containing versions of all images in Z with a particular distortion applied  
710 is called Z'. Any neuron that responded to images in Z less strongly than the neuron's firing  
711 threshold were ignored as they are not selective for features observed in the test images.  
712 However, for all remaining neurons, the firing rate at a particular distortion strength is calculated  
713 as the number of images in Z' that activate the neuron over its firing threshold divided by the  
714 number of images in Z. The mean firing rate to a particular distortion is then the average of firing  
715 rates for any of the 2,048 neurons that were selective enough to be considered.

716

717

718 Feature selectivity

719

720 To measure feature selectivity, we first manually segmented 3 organelles (ER, mitochondria,  
721 nucleus) in 3 images. By construction, the ResNet50 architecture downsamples an input image  
722 by 32. For thin and small organelles like ER, the final feature maps were too coarse to accurately  
723 show the localization of responses. Therefore, we eliminated the last 4 downsampling operations  
724 such that the output feature map was only 2x smaller than the input. Following similar logic, we  
725 eliminated the last 2 downsampling operations for mitochondria and the last downsampling  
726 operation for nuclei -- 8x and 16x smaller than the input images, respectively. For all organelles,  
727 these differently downsampled feature maps were resized to match the dimensions of the input  
728 image (224x224) and then each feature map was compared against the ground truth labelmap by  
729 Point Biserial correlation. A simple average of the 32 most correlated feature maps was then  
730 overlaid on the original image as the mean response. Drawing a threshold at 0.3 yielded the  
731 binary segmentations.

732

733 Occlusion Analysis

734

735 Typically, occlusion analysis measures the importance of regions in an image to a classification  
736 task [48]. In our experiments, importance was measured as a function of the dot product  
737 similarity between the feature vectors output by the global average pooling layer of a ResNet50  
738 for an image and its occluded copy. Sequential regions of 61x61 pixels spaced every 30 pixels  
739 (in both x and y dimensions) were zeroed out in each image. Region importance to the similarity  
740 measurement was then normalized to fall in the range 0 to 1 and overlaid on the original image.

741

742

743 **References**

- 744 [1] S. Y. Takemura *et al.*, “Synaptic circuits and their variations within different columns in  
745 the visual system of *Drosophila*,” *Proc. Natl. Acad. Sci. U. S. A.*, vol. 112, no. 44, pp.  
746 13711–13716, Nov. 2015.
- 747 [2] N. Kasthuri *et al.*, “Saturated Reconstruction of a Volume of Neocortex,” *Cell*, vol. 162,  
748 no. 3, pp. 648–661, Aug. 2015.
- 749 [3] A. E. Vincent, D. M. Turnbull, V. Eisner, G. Hajnóczky, and M. Picard, “Mitochondrial  
750 Nanotunnels,” *Trends Cell Biol.*, vol. 27, no. 11, pp. 787–799, Nov. 2017.
- 751 [4] A. E. Vincent, K. White, T. Davey, R. W. Taylor, D. M. Turnbull, and M. Picard,  
752 “Quantitative 3D Mapping of the Human Skeletal Muscle Mitochondrial Network,”  
753 *CellReports*, vol. 26, pp. 996-1009.e4, 2019.
- 754 [5] D. P. Hoffman *et al.*, “Correlative three-dimensional super-resolution and block-face  
755 electron microscopy of whole vitreously frozen cells,” *Science (80-. )*, vol. 367, no. 6475,  
756 Jan. 2020.
- 757 [6] C. Y. Wang, H. Y. Mark Liao, Y. H. Wu, P. Y. Chen, J. W. Hsieh, and I. H. Yeh,  
758 “CSPNet: A new backbone that can enhance learning capability of CNN,” in *IEEE*  
759 *Computer Society Conference on Computer Vision and Pattern Recognition Workshops*,  
760 2020, vol. 2020-June, pp. 1571–1580.
- 761 [7] A. Tao, K. Sapra, and B. Catanzaro, “Hierarchical Multi-Scale Attention for Semantic  
762 Segmentation,” *arXiv2005.10821 [cs]*, May 2020.
- 763 [8] N. Carion, F. Massa, G. Synnaeve, N. Usunier, A. Kirillov, and S. Zagoruyko, “End-to-  
764 End Object Detection with Transformers,” *arXiv2005.12872 [cs]*, May 2020.
- 765 [9] K. He, G. Gkioxari, P. Dollár, and R. Girshick, “Mask R-CNN,” *IEEE Trans. Pattern*  
766 *Anal. Mach. Intell.*, vol. 42, no. 2, pp. 386–397, Feb. 2020.
- 767 [10] J. W. Lichtman, H. Pfister, and N. Shavit, “The big data challenges of connectomics,”  
768 *Nat. Neurosci.*, vol. 17, no. 11, pp. 1448–1454, Oct. 2014.
- 769 [11] S. M. Plaza and J. Funke, “Analyzing Image Segmentation for Connectomics,” *Front.*  
770 *Neural Circuits*, vol. 12, p. 102, Nov. 2018.
- 771 [12] A. Goodfellow, Ian; Bengio, Yoshua; Courville, *Deep Learning*. MIT Press, 2016.
- 772 [13] F. Pereira, P. Norvig, and A. Halev, “The Unreasonable Effectiveness of Data,” *IEEE*  
773 *Intell. Syst.*, 2009.

- 774 [14] C. Sun, A. Shrivastava, S. Singh, and A. Gupta, “Revisiting Unreasonable Effectiveness  
775 of Data in Deep Learning Era,” *Proc. IEEE Int. Conf. Comput. Vis.*, vol. 2017-October, pp.  
776 843–852, Jul. 2017.
- 777 [15] M. Guay, Z. Emam, A. Anderson, M. Aronova, and R. Leapman, “Dense cellular  
778 segmentation using 2D-3D neural network ensembles for electron microscopy,” *bioRxiv*  
779 *2020.01.05.895003*, 2020.
- 780 [16] M. Žerovnik Mekuč *et al.*, “Automatic segmentation of mitochondria and endolysosomes  
781 in volumetric electron microscopy data,” *Comput. Biol. Med.*, vol. 119, p. 103693, 2020.
- 782 [17] V. Casser, K. Kang, H. Pfister, and D. Haehn, “Fast Mitochondria Segmentation for  
783 Connectomics,” *arXiv1812.06024 [cs]*, Dec. 2018.
- 784 [18] A. J. Perez *et al.*, “A workflow for the automatic segmentation of organelles in electron  
785 microscopy image stacks,” *Front. Neuroanat.*, vol. 8, no. November, p. 126, Nov. 2014.
- 786 [19] M. Berning, K. M. Boergens, and M. Helmstaedter, “SegEM: Efficient Image Analysis for  
787 High-Resolution Connectomics,” *Neuron*, vol. 87, pp. 1193–1206, 2015.
- 788 [20] M. Januszewski *et al.*, “High-precision automated reconstruction of neurons with flood-  
789 filling networks,” *Nat. Methods*, vol. 15, no. 8, pp. 605–610, 2018.
- 790 [21] J. Funke *et al.*, “Large Scale Image Segmentation with Structured Loss Based Deep  
791 Learning for Connectome Reconstruction,” *IEEE Trans. Pattern Anal. Mach. Intell.*, vol.  
792 41, no. 7, pp. 1669–1680, Jul. 2019.
- 793 [22] J. Buhmann *et al.*, “Automatic Detection of Synaptic Partners in a Whole-Brain  
794 Drosophila EM Dataset,” *bioRxiv*, p. 2019.12.12.874172, Mar. 2019.
- 795 [23] H. Spiers *et al.*, “Citizen science, cells and CNNs – deep learning for automatic  
796 segmentation of the nuclear envelope in electron microscopy data, trained with volunteer  
797 segmentations,” *bioRxiv*, p. 2020.07.28.223024, Jul. 2020.
- 798 [24] J. S. Kim *et al.*, “Space-time wiring specificity supports direction selectivity in the retina,”  
799 *Nature*, vol. 509, no. 7500, pp. 331–336, May 2014.
- 800 [25] J. Deng, W. Dong, R. Socher, L.-J. Li, K. Li, and L. Fei-Fei, “ImageNet: A Large-Scale  
801 Hierarchical Image Database,” *Int. J. Comput. Vis.*, vol. 115, no. 3, pp. 211–252, 2015.
- 802 [26] S. Ren, K. He, R. Girshick, and J. Sun, “Faster R-CNN: Towards Real-Time Object  
803 Detection with Region Proposal Networks,” *IEEE Trans. Pattern Anal. Mach. Intell.*, vol.  
804 39, no. 6, pp. 1137–1149, Jun. 2017.

- 805 [27] M. Huh, P. Agrawal, and A. A. Efros, “What makes ImageNet good for transfer  
806 learning?,” *arXiv1608.08614 [cs]*, 2016.
- 807 [28] J. Devlin, M.-W. Chang, K. Lee, and K. Toutanova, “BERT: Pre-training of Deep  
808 Bidirectional Transformers for Language Understanding,” *NAACL HLT 2019 - 2019 Conf.*  
809 *North Am. Chapter Assoc. Comput. Linguist. Hum. Lang. Technol. - Proc. Conf.*, vol. 1,  
810 pp. 4171–4186, Oct. 2018.
- 811 [29] C. Karabağ, M. L. Jones, C. J. Peddie, A. E. Weston, L. M. Collinson, and C. C. Reyes-  
812 Aldasoro, “Semantic segmentation of HeLa cells: An objective comparison between one  
813 traditional algorithm and four deep-learning architectures,” *PLoS One*, vol. 15, no. 10, p.  
814 e0230605, Oct. 2020.
- 815 [30] K. S. Devan, P. Walther, J. von Einem, T. Ropinski, H. A. Kestler, and C. Read,  
816 “Detection of herpesvirus capsids in transmission electron microscopy images using  
817 transfer learning,” *Histochem. Cell Biol.*, vol. 151, no. 2, pp. 101–114, Feb. 2019.
- 818 [31] M. Raghu, C. Zhang, J. Kleinberg, and S. Bengio, “Transfusion: Understanding transfer  
819 learning for medical imaging,” in *Advances in Neural Information Processing Systems*,  
820 2019, vol. 32.
- 821 [32] Y. Tian, D. Krishnan, and P. Isola, “Contrastive Multiview Coding,” *arXiv1906.05849*  
822 *[cs]*, Jun. 2019.
- 823 [33] T. Chen, S. Kornblith, M. Norouzi, and G. Hinton, “A Simple Framework for Contrastive  
824 Learning of Visual Representations,” *arXiv2002.05709 [cs]*, 2020.
- 825 [34] K. He, H. Fan, Y. Wu, S. Xie, and R. Girshick, “Momentum Contrast for Unsupervised  
826 Visual Representation Learning,” *arXiv1911.05722 [cs]*, Nov. 2019.
- 827 [35] J. Donahue and K. Simonyan, “Large Scale Adversarial Representation Learning,”  
828 *arXiv1907.02544 [cs]*, Jul. 2019.
- 829 [36] X. Ji, J. F. Henriques, and A. Vedaldi, “Invariant Information Clustering for Unsupervised  
830 Image Classification and Segmentation,” *arxiv1807.06653 [cs]*, Jul. 2018.
- 831 [37] Z. Wu, Y. Xiong, S. X. Yu, and D. Lin, “Unsupervised Feature Learning via Non-  
832 Parametric Instance Discrimination,” *arxiv1805.01978 [cs]*, 2018.
- 833 [38] A. Kolesnikov *et al.*, “Large Scale Learning of General Visual Representations for  
834 Transfer,” *arxiv1912.11370 [cs]*, Dec. 2019.
- 835 [39] X. Chen, H. Fan, R. Girshick, and K. He, “Improved Baselines with Momentum

- 836 Contrastive Learning,” *arxiv2003.04297 [cs]*, 2020.
- 837 [40] J. T. Vogelstein *et al.*, “A community-developed open-source computational ecosystem  
838 for big neuro data,” *Nat. Methods*, vol. 15, no. 11, pp. 846–847, Nov. 2018.
- 839 [41] A. Iudin, P. K. Korir, J. Salavert-Torres, G. J. Kleywegt, and A. Patwardhan, “EMPIAR:  
840 A public archive for raw electron microscopy image data,” *Nat. Methods*, vol. 13, no. 5,  
841 pp. 387–388, May 2016.
- 842 [42] “CREMI,” *Miccai Challenge on Circuit Reconstruction From Electron Microscopy*  
843 *Images (CREMI)*, 2016. [Online]. Available: <https://cremi.org/>. [Accessed: 27-Oct-2020].
- 844 [43] K. He, X. Zhang, S. Ren, and J. Sun, “Deep residual learning for image recognition,” in  
845 *Proceedings of the IEEE Computer Society Conference on Computer Vision and Pattern*  
846 *Recognition*, 2016, vol. 2016-Decem, pp. 770–778.
- 847 [44] O. Ronneberger, P. Fischer, and T. Brox, “U-net: Convolutional networks for biomedical  
848 image segmentation,” in *Lecture Notes in Computer Science (including subseries Lecture*  
849 *Notes in Artificial Intelligence and Lecture Notes in Bioinformatics)*, 2015, vol. 9351, pp.  
850 234–241.
- 851 [45] C. Ju, A. Bibaut, and M. J. Van Der Laan, “The Relative Performance of Ensemble  
852 Methods with Deep Convolutional Neural Networks for Image Classification,”  
853 *arxiv1704.01664 [cs]*, 2017.
- 854 [46] E. B. Bloss, M. S. Cembrowski, B. Karsh, J. Colonell, R. D. Fetter, and N. Spruston,  
855 “Single excitatory axons form clustered synapses onto CA1 pyramidal cell dendrites,”  
856 *Nat. Neurosci.*, vol. 21, no. 3, pp. 353–363, Mar. 2018.
- 857 [47] I. J. Goodfellow, Q. V Le, A. M. Saxe, H. Lee, and A. Y. Ng, “Measuring Invariances in  
858 Deep Networks,” in *Advances in Neural Information Processing Systems*, 2009, pp. 646–  
859 654.
- 860 [48] M. D. Zeiler and R. Fergus, “Visualizing and understanding convolutional networks,” in  
861 *Lecture Notes in Computer Science (including subseries Lecture Notes in Artificial*  
862 *Intelligence and Lecture Notes in Bioinformatics)*, 2014, vol. 8689 LNCS, no. PART 1,  
863 pp. 818–833.
- 864 [49] K. He, R. Girshick, and P. Dollár, “Rethinking ImageNet Pre-training,” *Proc. IEEE Int.*  
865 *Conf. Comput. Vis.*, vol. 2019-October, pp. 4917–4926, Nov. 2018.
- 866 [50] Y. Tian, C. Sun, B. Poole, D. Krishnan, C. Schmid, and P. Isola, “What makes for good

- 867 views for contrastive learning,” *arxiv2005.10243 [cs]*, May 2020.
- 868 [51] M. Minderer, O. Bachem, N. Houlsby, and M. Tschannen, “Automatic Shortcut Removal  
869 for Self-Supervised Representation Learning,” *arxiv2002.08822 [cs]*, 2020.
- 870 [52] J. Yosinski, J. Clune, Y. Bengio, and H. Lipson, “How transferable are features in deep  
871 neural networks?,” in *Advances in Neural Information Processing Systems*, 2014, pp.  
872 3320–3328.
- 873 [53] B. Neyshabur, H. Sedghi, and C. Zhang, “What is being transferred in transfer learning?,”  
874 *arxiv2008.11687 [cs]*, 2020.
- 875 [54] B. Zoph *et al.*, “Rethinking Pre-training and Self-training,” *arxiv2006.06882 [cs]*, Jun.  
876 2020.
- 877 [55] L. Heinrich, J. Funke, C. Pape, J. Nunez-Iglesias, and S. Saalfeld, “Synaptic Cleft  
878 Segmentation in Non-Isotropic Volume Electron Microscopy of the Complete *Drosophila*  
879 Brain,” *arxiv1805.02718 [cs]*, 2018.
- 880 [56] J. Funke *et al.*, “Large Scale Image Segmentation with Structured Loss based Deep  
881 Learning for Connectome Reconstruction,” *arXiv1709.02974 [cs]*, 2020.
- 882 [57] D. Mahajan *et al.*, “Exploring the Limits of Weakly Supervised Pretraining,”  
883 *arXiv1805.00932 [cs]*, 2018.
- 884 [58] “Kind of Like That,” *The Hacker Factor Blog*, 2013. [Online]. Available:  
885 <http://www.hackerfactor.com/blog/index.php?/archives/529-Kind-of-Like-That.html>.  
886 [Accessed: 28-Oct-2020].
- 887 [59] T. Ojala, M. Pietikäinen, and T. Mäenpää, “Multiresolution gray-scale and rotation  
888 invariant texture classification with local binary patterns,” *IEEE Trans. Pattern Anal.*  
889 *Mach. Intell.*, vol. 24, no. 7, pp. 971–987, Jul. 2002.
- 890 [60] J. Canny, “A Computational Approach to Edge Detection,” *IEEE Trans. Pattern Anal.*  
891 *Mach. Intell.*, vol. PAMI-8, no. 6, pp. 679–698, 1986.
- 892 [61] I. Loshchilov and F. Hutter, “Decoupled Weight Decay Regularization,” *7th Int. Conf.*  
893 *Learn. Represent. ICLR 2019*, Nov. 2017.
- 894 [62] L. N. Smith, “A disciplined approach to neural network hyper-parameters: Part 1 --  
895 learning rate, batch size, momentum, and weight decay,” *arxiv1803.09820 [cs]*, Mar.  
896 2018.
- 897 [63] R. Conrad, H. Lee, and K. Narayan, “Enforcing Prediction Consistency Across

898           Orthogonal Planes Significantly Improves Segmentation of FIB-SEM Image Volumes by  
899           2D Neural Networks.,” *Microsc. Microanal.*, pp. 1–4, Jul. 2020.  
900  
901



## 902 **Figure Legends**

903

904 **Figure 1: Preparation of a deep learning appropriate 2D EM image dataset rich with**  
905 **relevant and unique features.** (a) Percent distribution of collated experiments grouped by  
906 imaging technique TEM, transmission EM; SEM, scanning EM. (b) Distribution of imaging  
907 plane pixel spacings in nm for volumes in the 3D corpus. (c) Percent distribution of collated  
908 experiments by organism and tissue origin. (d) Schematic of our workflow: 2D EM image stacks  
909 (top left) or 3D EM image volumes sliced into 2D cross-sections (top right) were cropped into  
910 patches of 224 x 224 pixels, comprising CEMraw. Nearly identical patches excepting a single  
911 exemplar were eliminated to generate CEMdedup. Uninformative patches were culled to form  
912 CEM500K.

913

914 **Figure 2: CEM500K pre-training improves the transferability of learned features.**

915 (a) Example images and colored label maps from each of the six publicly available benchmark  
916 datasets: clockwise from top left: Kasthuri++, UroCell, CREMI Synaptic Clefts, Guay, Perez,  
917 and Lucchi++. The All Mitochondria benchmark is a superset of these benchmarks and is not  
918 depicted. (b) Schematic of our pre-training, fine-tuning and evaluation workflow. Gray blocks  
919 denote trainable models with randomly initialized parameters; blue block denotes a model with  
920 frozen pre-trained parameters. (c) Baseline IoU scores for each benchmark achieved by skipping  
921 MoCoV2 pre-training. Randomly initialized parameters in ResNet50 layers were transferred  
922 directly to UNet-ResNet50 and frozen during training. (d) Measured percent difference in IoU  
923 scores between models pre-trained on CEMraw vs CEM500K (red) and on CEMdedup vs  
924 CEM500K (blue). (e) Measured percent difference in IoU scores between a model pre-trained on  
925 CEM500K over the mouse brain (Bloss) pre-training dataset. Benchmark datasets comprised  
926 exclusively of EM images of mouse brain tissue are highlighted.

927

928 **Figure 3: Features learned from CEM500K pre-training are more robust to image**  
929 **transformations and encode for semantically meaningful objects with greater selectivity.** (a)  
930 Mean firing rates calculated between feature vectors of images distorted by i. Rotation, ii.  
931 Gaussian blur, iii. Gaussian noise, iv. Brightness, v. Contrast, vi. Scale. Dashed black lines show  
932 the range of augmentations used for CEM500K + MoCoV2 during pre-training. For transforms

933 in the top row, the undistorted images occur at  $x=0$ ; bottom row, at  $x=1$ . (b) Evaluation of  
934 features corresponding to ER (left), mitochondria (middle) and nucleus (right). For each  
935 organelle, the panels show: input image and ground truth label map (top row), heatmap of  
936 CEM500K-moco activations of the 32 filters most correlated with the organelle and CEM500K-  
937 moco binary mask created by thresholding the mean response at 0.3 (middle row), IN-moco  
938 activations and IN-moco binary mask (bottom row). Also included are Point-Biserial correlation  
939 coefficients ( $r_{pb}$ ) values and IoUs for each response and segmentation. All feature responses are  
940 rescaled to range  $[0, 1]$ . (c) Heatmap of occlusion analysis showing the region in each occluded  
941 image most important for forming a match with a corresponding reference image. All  
942 magnitudes are rescaled to range  $[0, 1]$ .

943  
944 **Figure 4: Models pre-trained on CEM500K yield superior segmentation quality and**  
945 **training speed on all segmentation benchmarks.** (a) Plot of percent difference in segmentation  
946 performance between pre-trained models and a randomly initialized model. (b) Example  
947 segmentations on the UroCell benchmark in 3D (top) and 2D (bottom). The black arrows shows  
948 the location of the same mitochondrion in 2D and in 3D. (c) Example segmentations from all  
949 2D-only benchmark datasets. The red arrow marks a false negative in ground truth segmentation  
950 detected by the CEM500K-moco pre-trained model. (d) Top, average IoU scores as a percent of  
951 the average IoU after 10,000 training iterations (ii); bottom, absolute average IoU scores over a  
952 range of training iteration lengths.

953  
954 **Table 1:** Comparison of segmentation IoU results for benchmark datasets from models randomly  
955 initialized and pre-trained with MoCoV2 on the Bloss dataset, and CEMraw, CEMdedup and  
956 CEM500K. \* denotes benchmarks that exclusively contain EM images from mouse brain tissue.  
957 The best result for each benchmark is highlighted in bold and underlined.

958  
959 **Table 2:** Comparison of segmentation IoU results for different weight initialization methods  
960 versus the best results on each benchmark as reported in the publication presenting the  
961 segmentation task.

962  
963 **Supplementary Table 1:** Characteristics of the benchmark datasets.

964

965 **Supplementary Figure 1: Deduplication and image filtering.** (a) Breakdown of fractions(top)  
966 and representative examples (bottom) of patches labeled “uninformative” by a trained DL model  
967 based on defect (as determined by a human annotator) (b) Receiver operating characteristic curve  
968 for the DL model classifier and a Random Forest classifier evaluated on a holdout test set of  
969 2,000 manually labeled patches (1,000 informative and 1,000 uninformative).

970

971 **Supplementary Figure 2: Randomly selected images from CEMraw, CEMdedup and**  
972 **CEM500K.**

973

974 **Supplementary Figure 3: Schematics of the MoCoV2 algorithm and UNet-ResNet50 model**  
975 **architecture.** (a) Shows a single step in the MoCoV2 algorithm. A batch of images is copied;  
976 images in each copy of the batch are independently and randomly transformed and then shuffled  
977 into a random order (the first batch is called the *query* and the second is called the *key*). *Query*  
978 and *key* are encoded by two different models, the *encoder* and *momentum encoder*, respectively.  
979 The encoded *key* is appended to the *queue*. Dot products of every image in the *query* with every  
980 image in the *queue* measure similarity. The similarity between an image in the *query* and its  
981 match from the *key* is the signal that informs parameter updates. More details in [34]. (b)  
982 Detailed schematic of the UNet-ResNet50 architecture.

983

984 **Supplementary Figure 4: Randomly selected images from the Bloss et al. 2018 pre-training**  
985 **dataset.**

986

987 **Supplementary Figure 5: Visual comparison of results on the UroCell benchmark.** The  
988 ground truth and Authors’ Best Results are taken from the original UroCell publication [16]. The  
989 results from fine-tuning the CEM500K-moco pre-trained model have been colorized to  
990 approximately match the originals; 2D label maps were not included in the UroCell paper.

991

992 **Supplementary Figure 6: Images from source EM volumes are unequally represented in**  
993 **the subsets of CEM.** The line at 45° shows the expected curve for perfect equality between all  
994 source volumes (i.e. each volume would contribute the same number of images to CEMraw,

995 CEM deup or CEM500K). Gini coefficients measure the area between the Lorenz Curves and the  
996 line of perfect equality, with 0 meaning perfect equality and 1 meaning perfect inequality. For  
997 each subset of CEM, approximately 20% of the source 3D volumes account for 80% of all the  
998 2D patches.

999

1000 **Supplementary Figure 7: Plot showing the percent of random crops from an image that**  
1001 **will be 100% uninformative based on the percent of the image that is informative.**

**Figure 1**

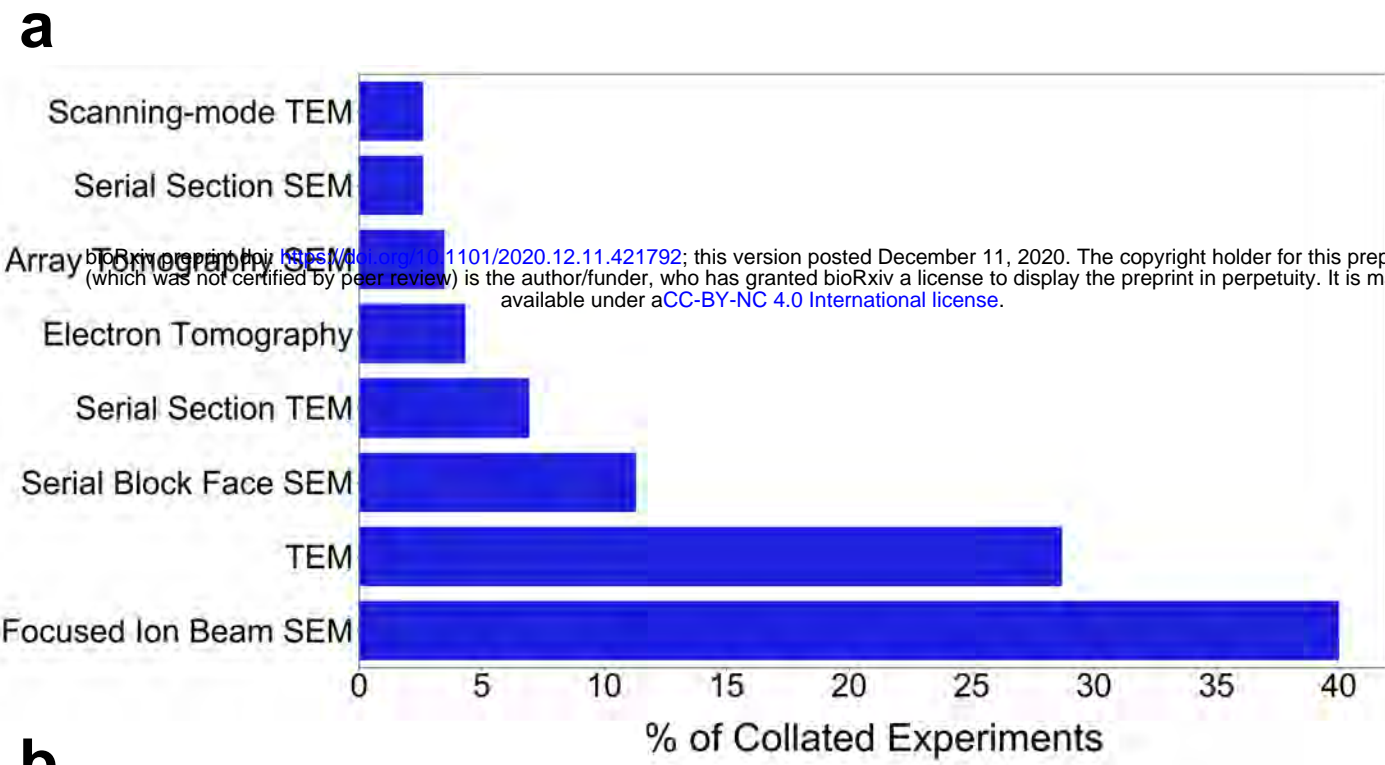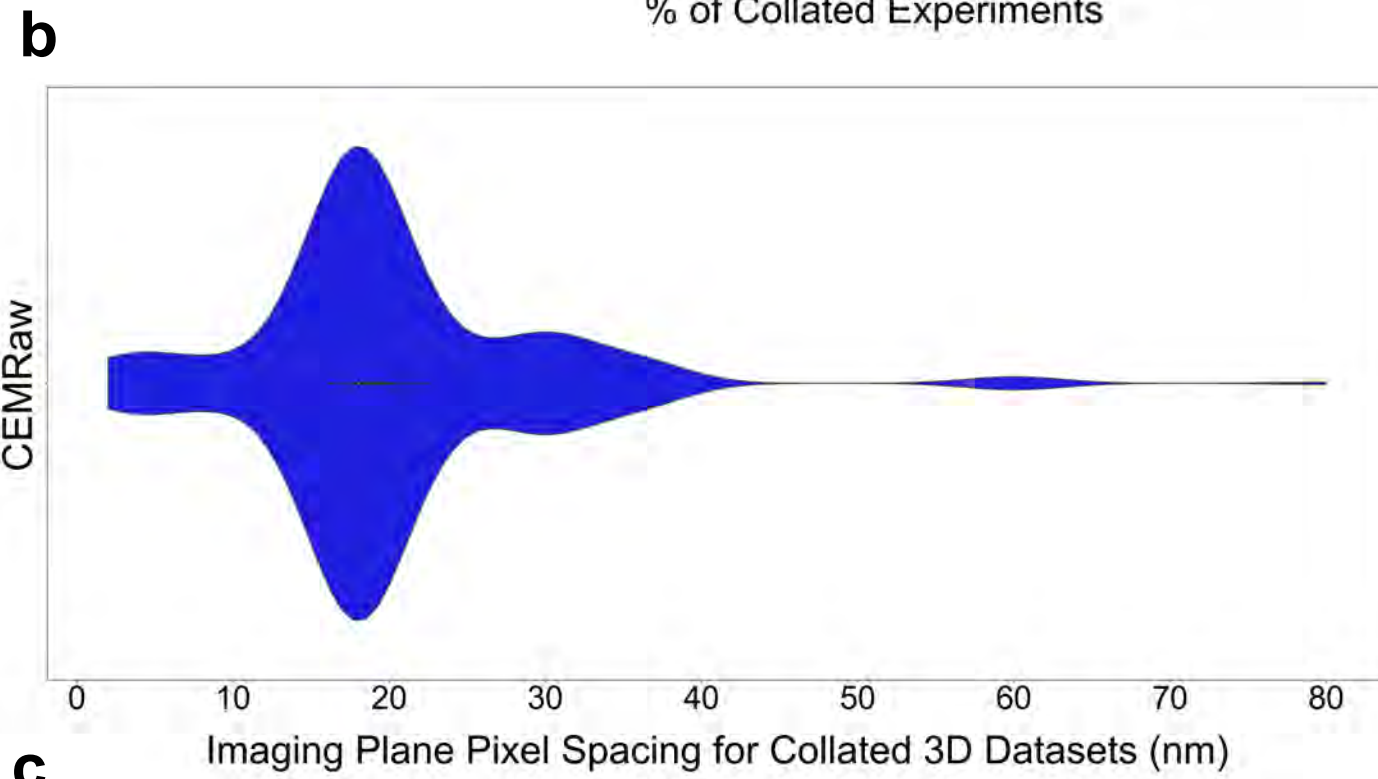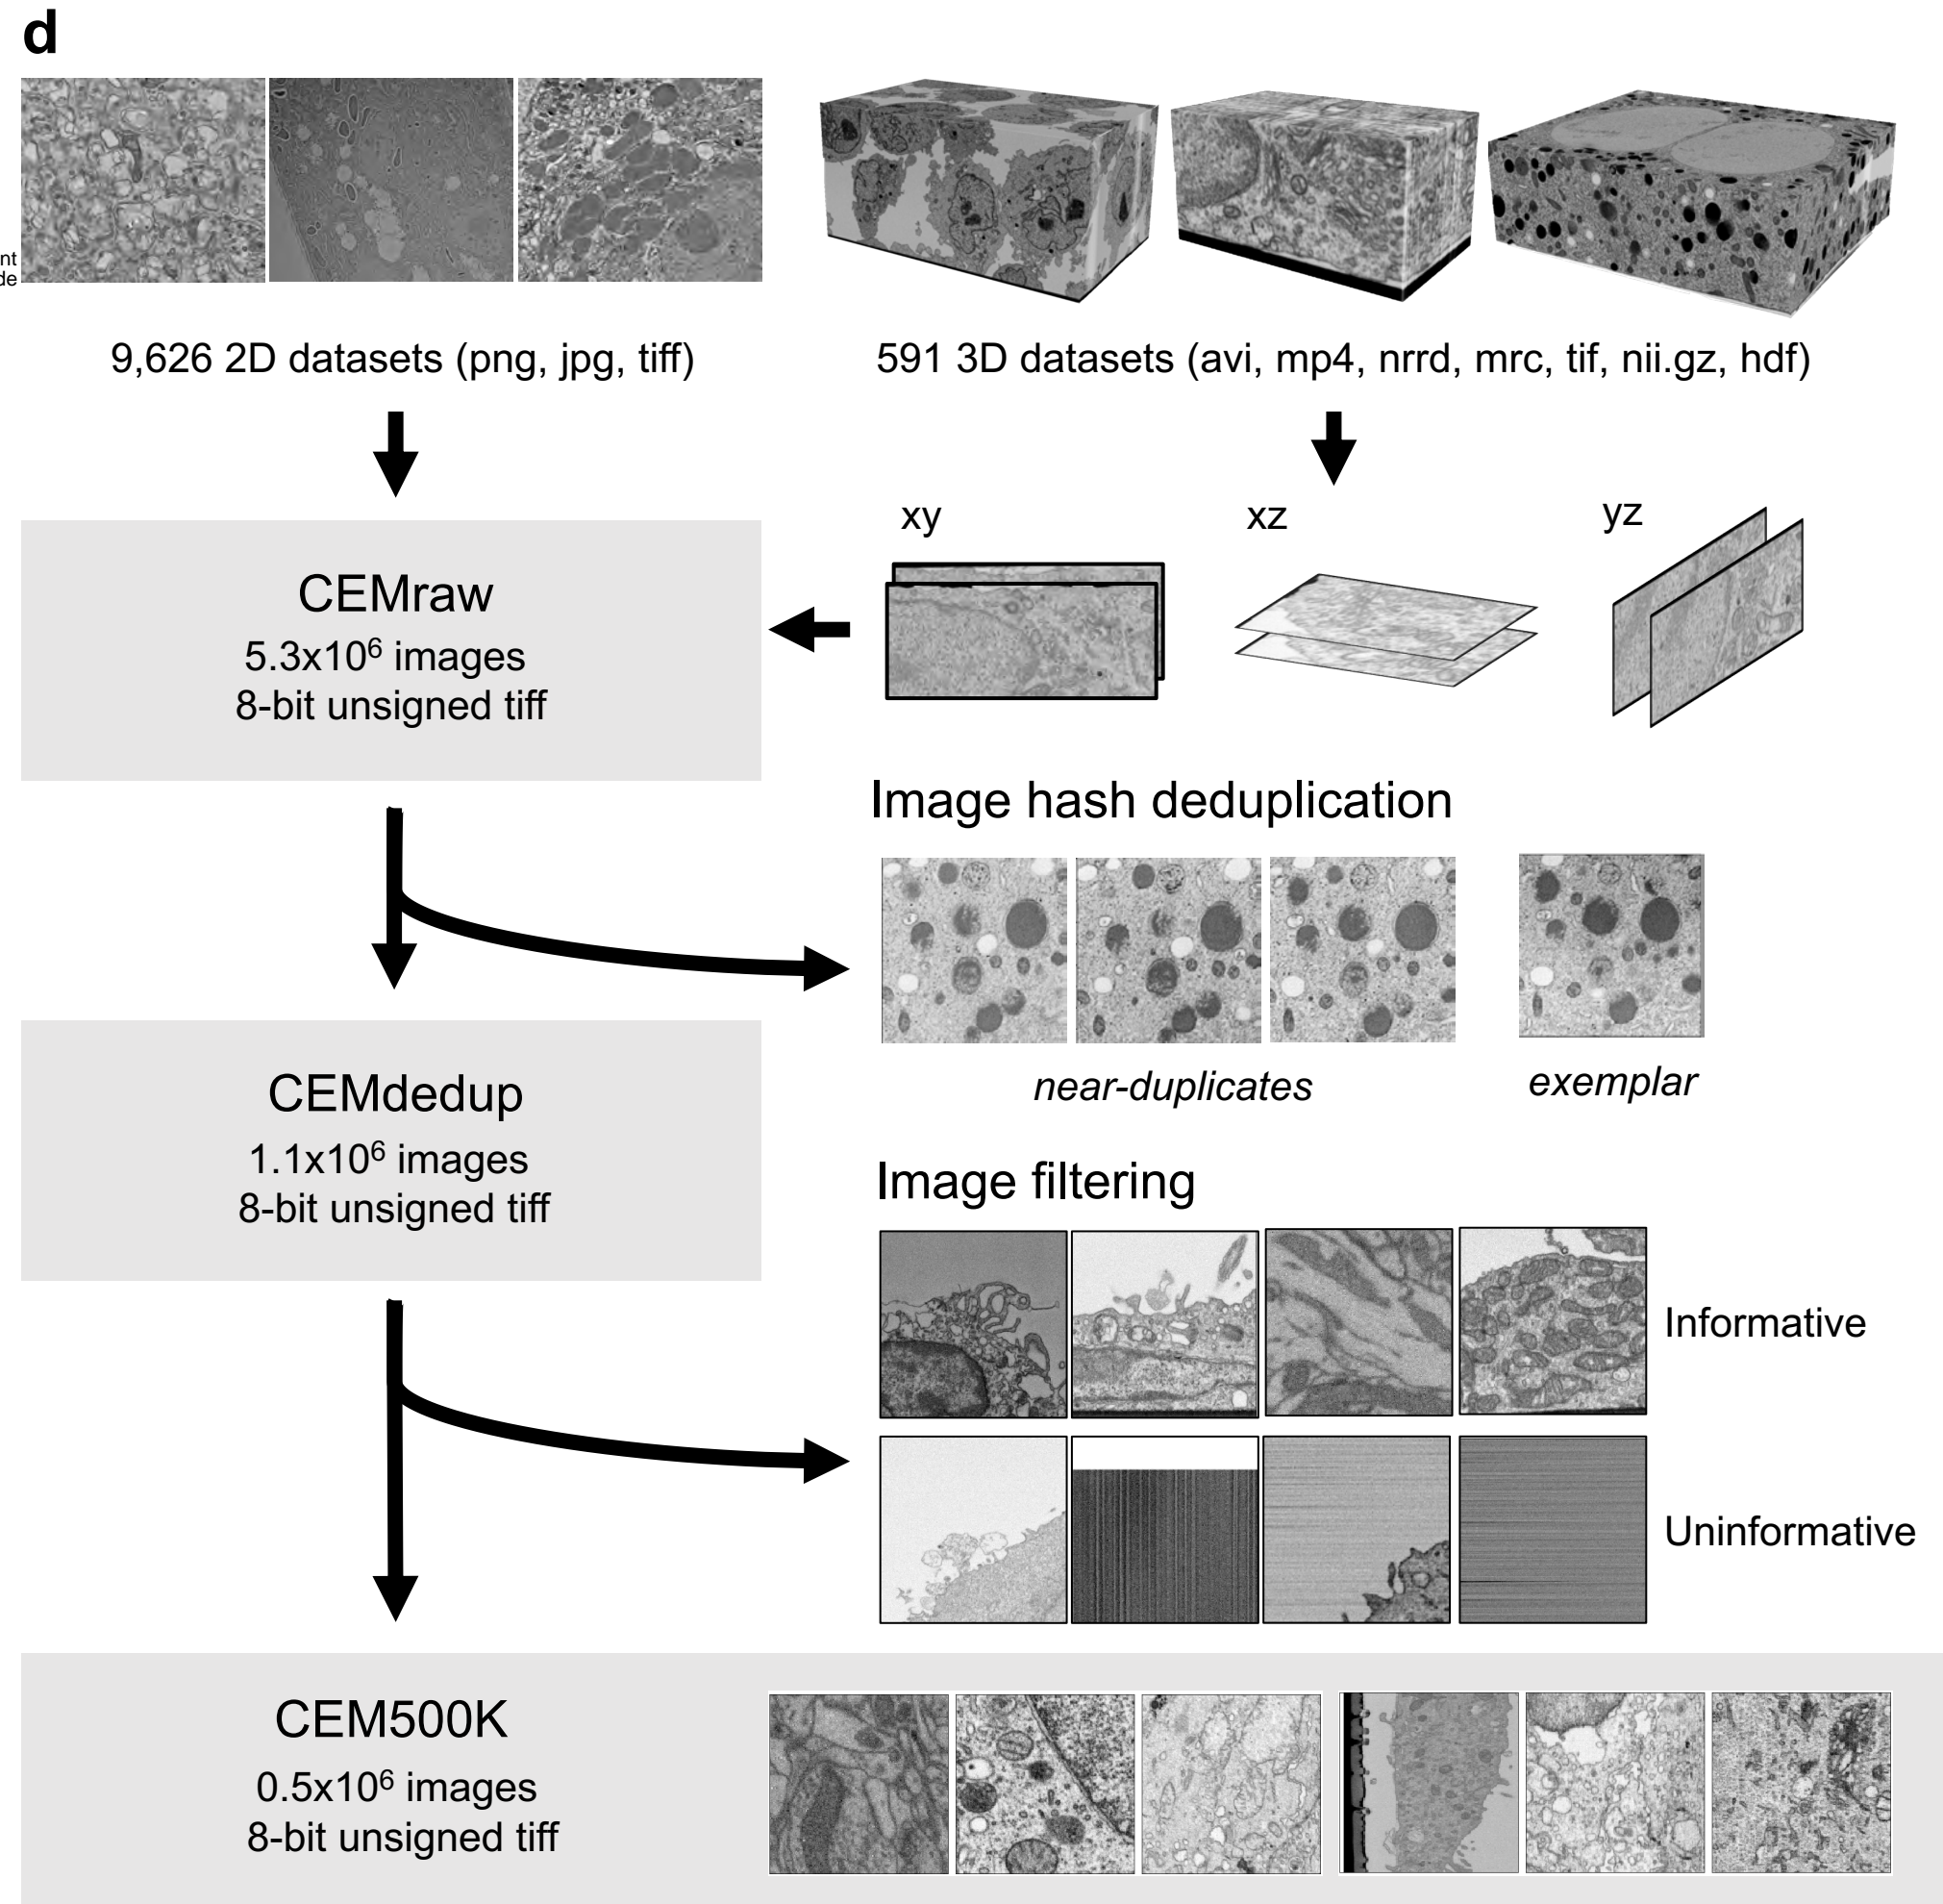

**Figure 2**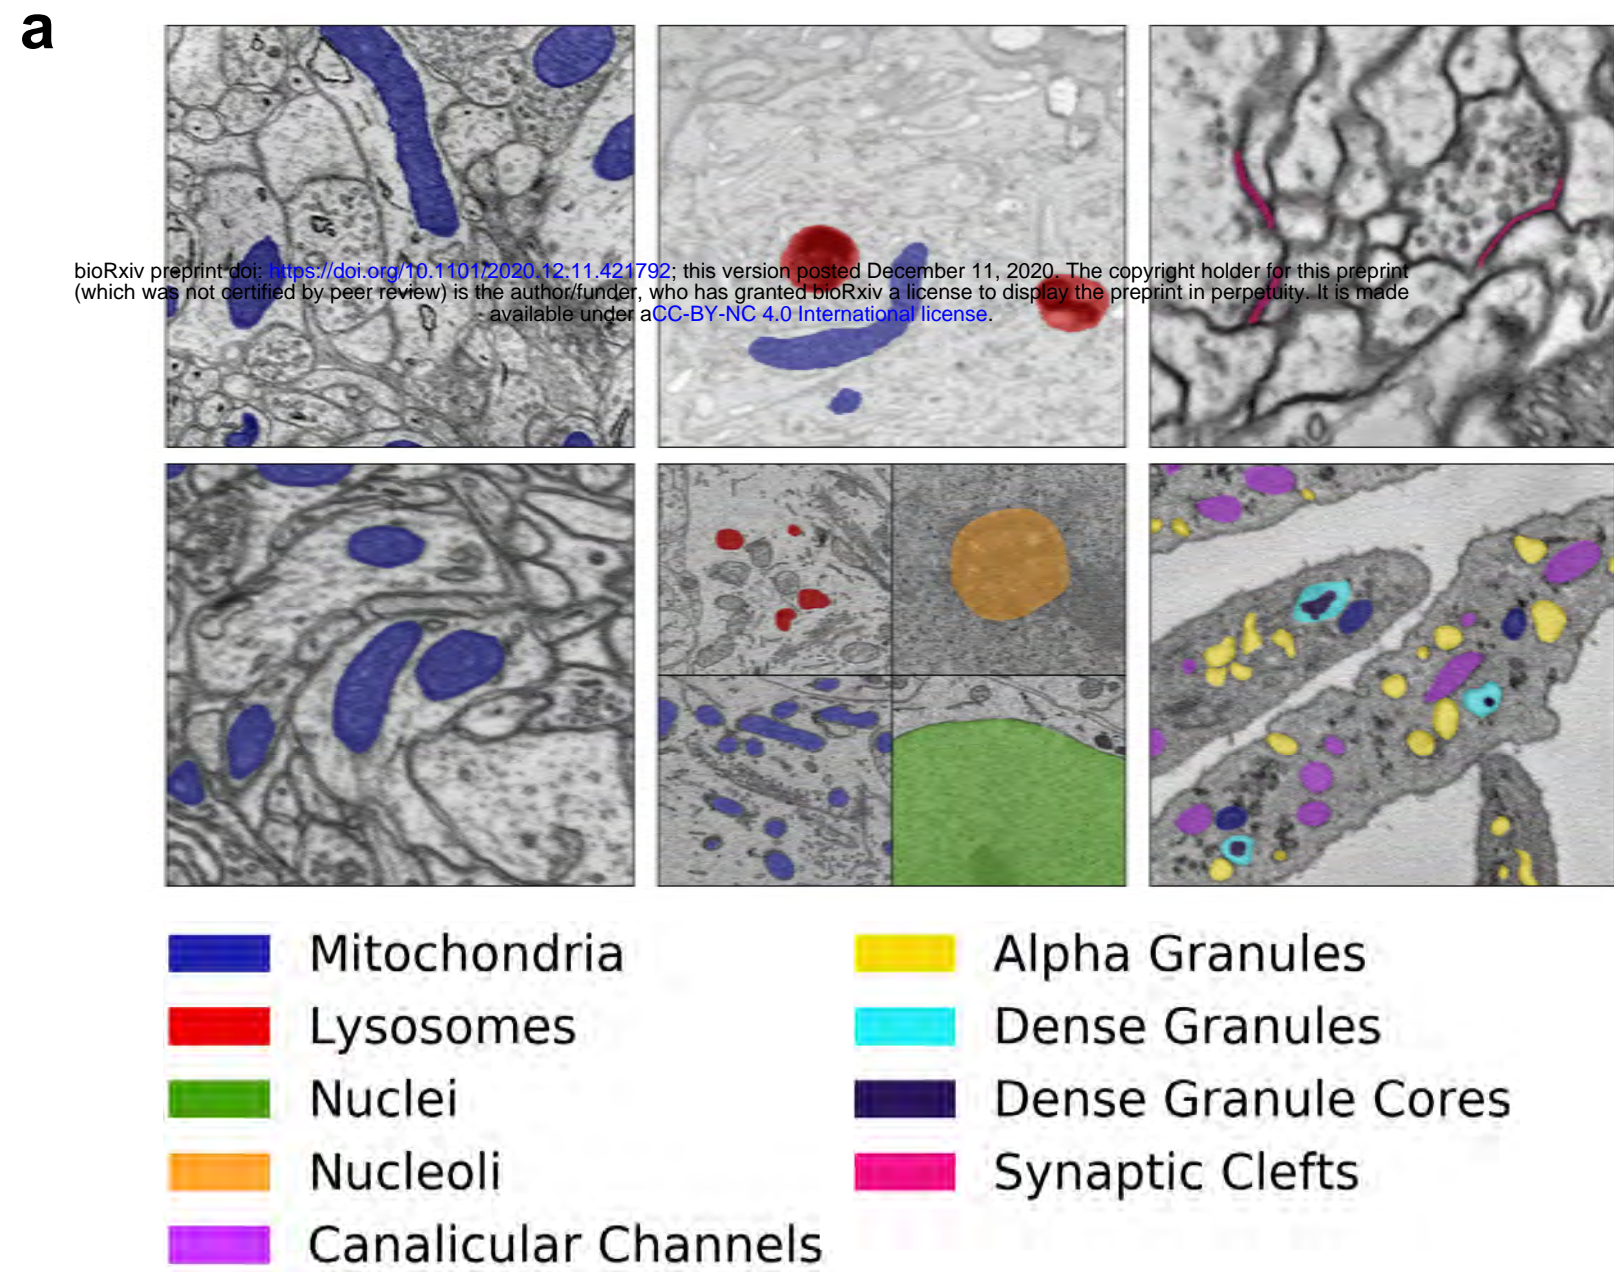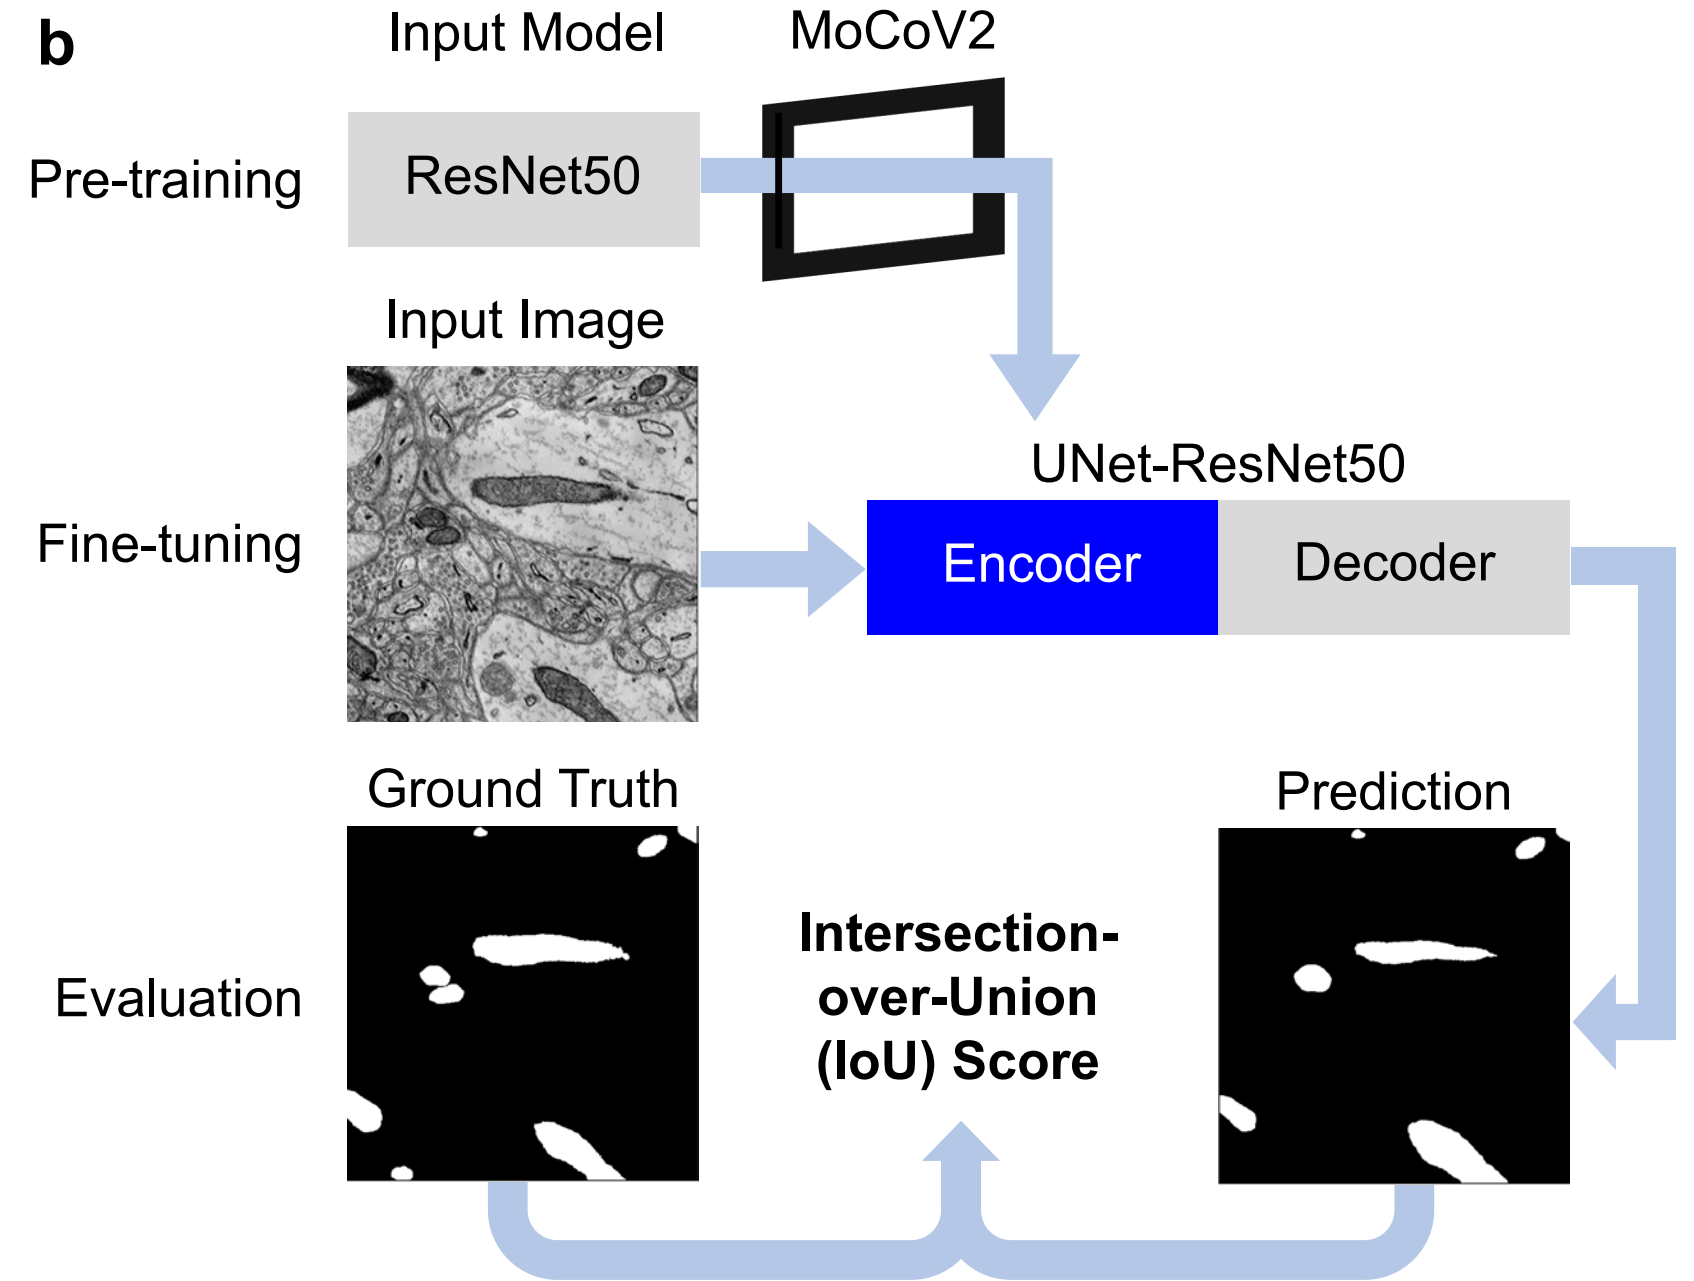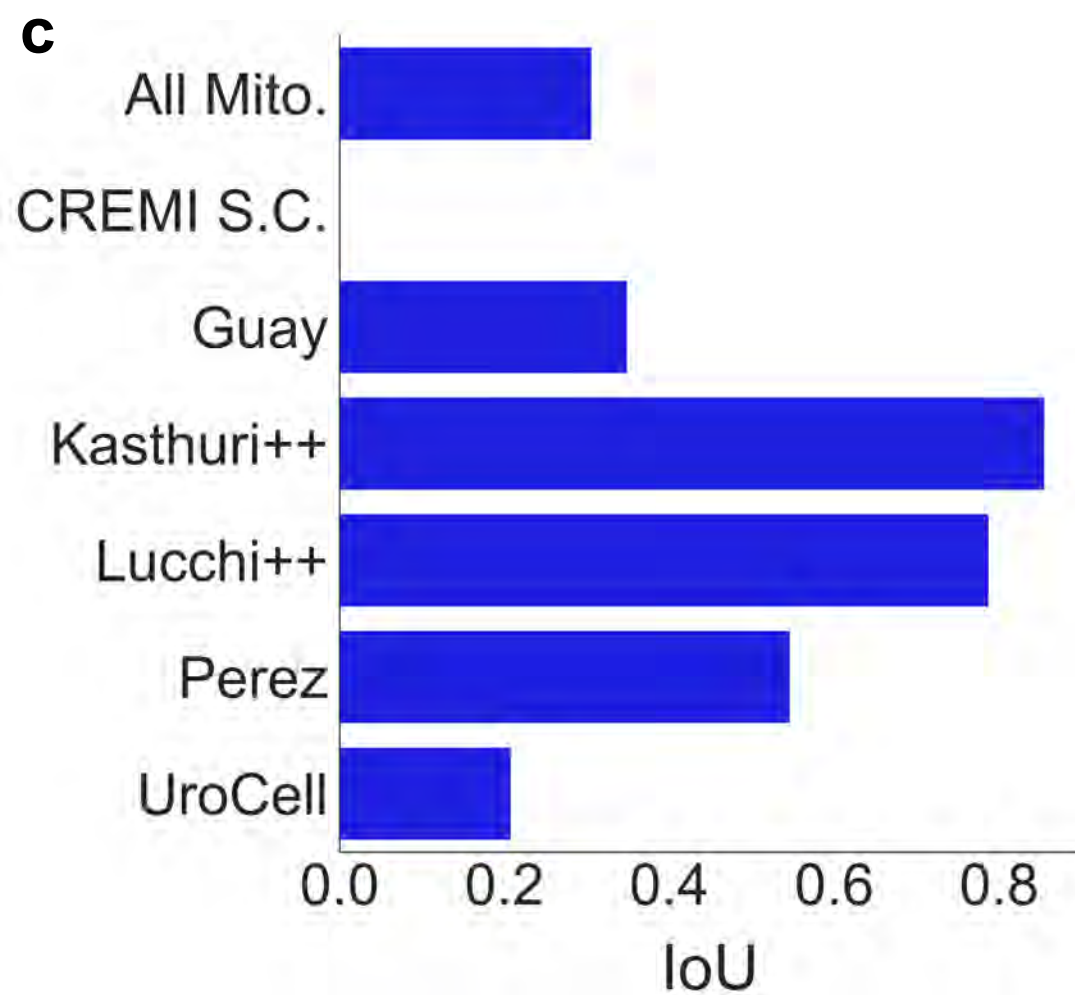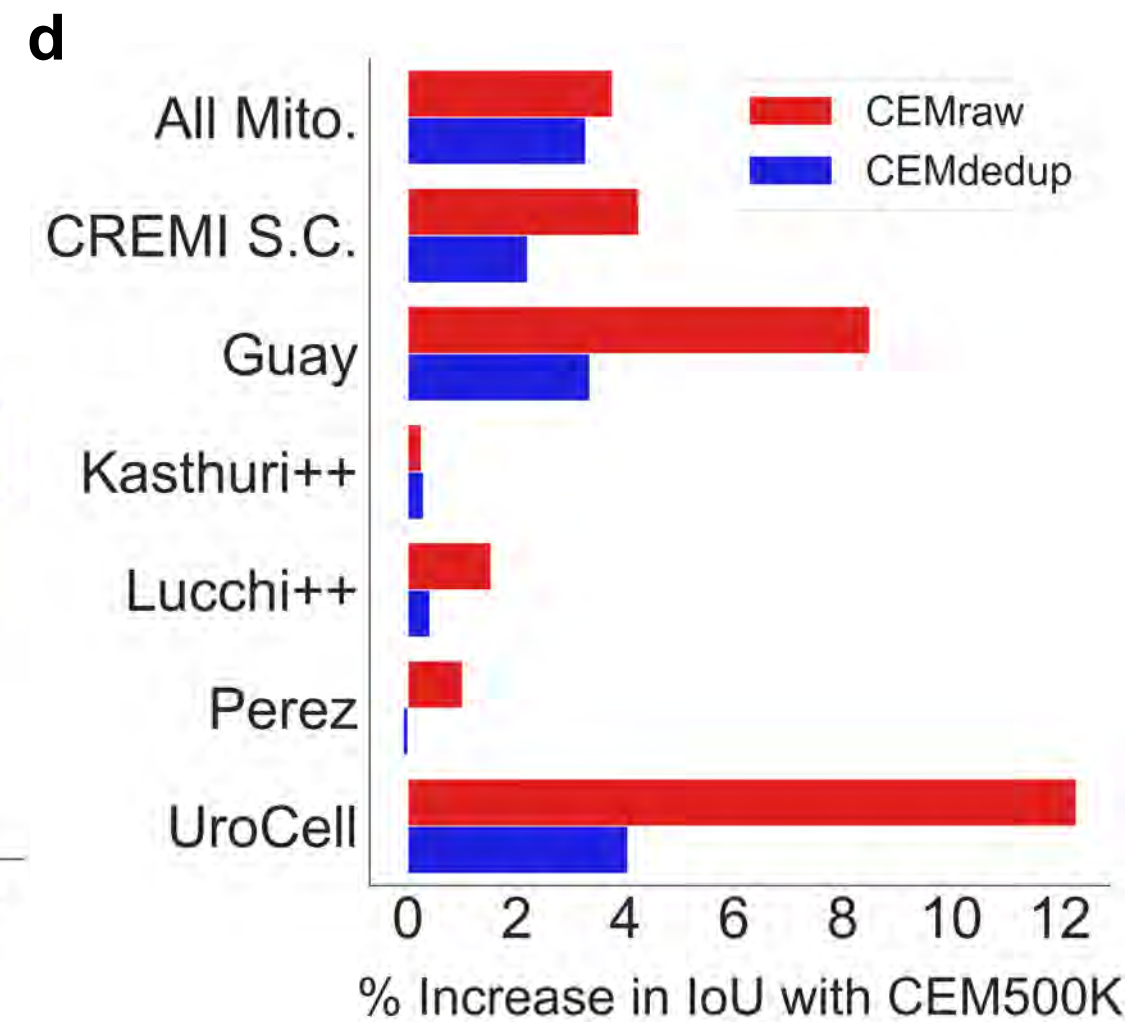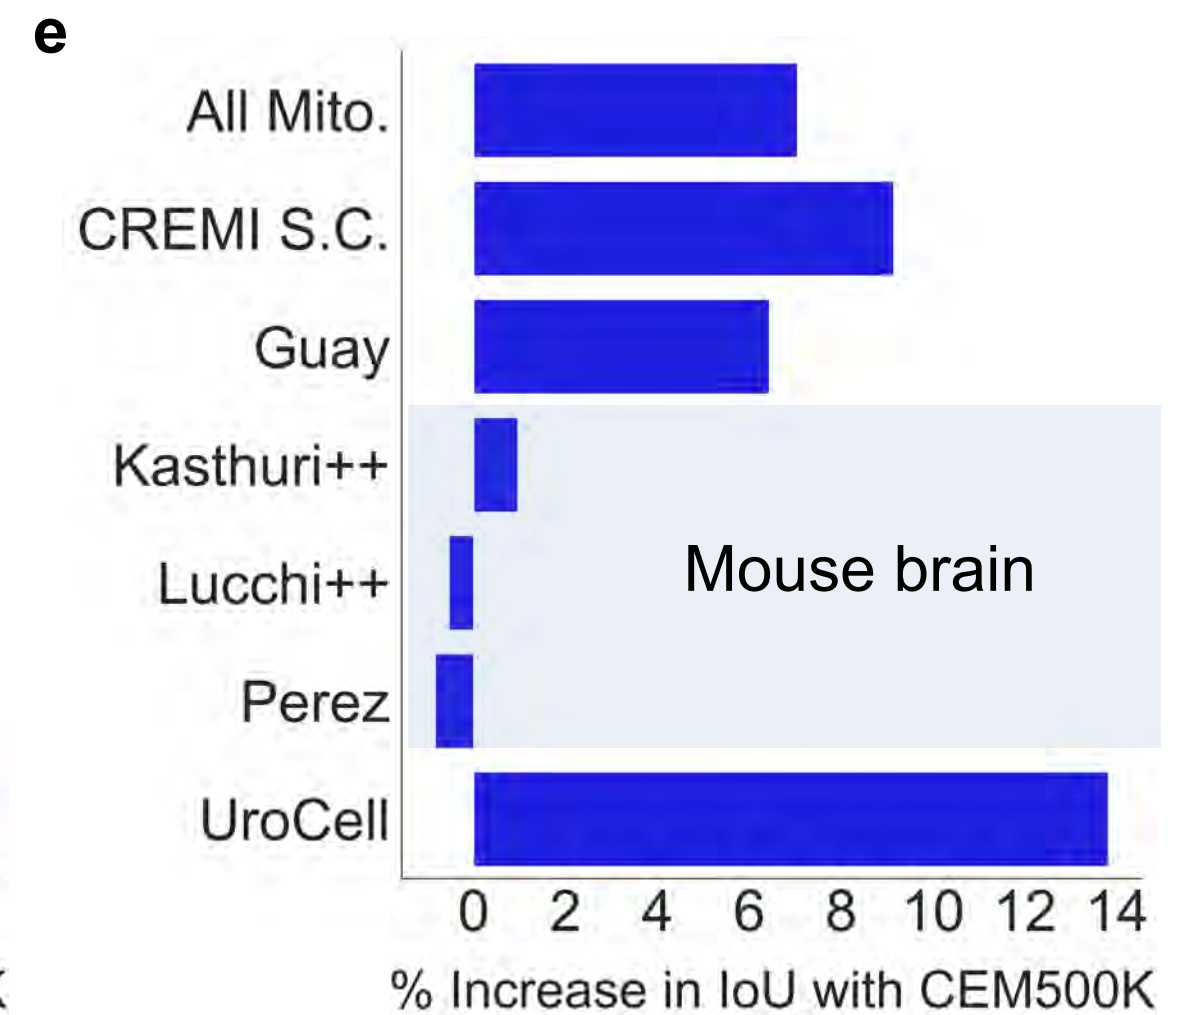

Figure 3

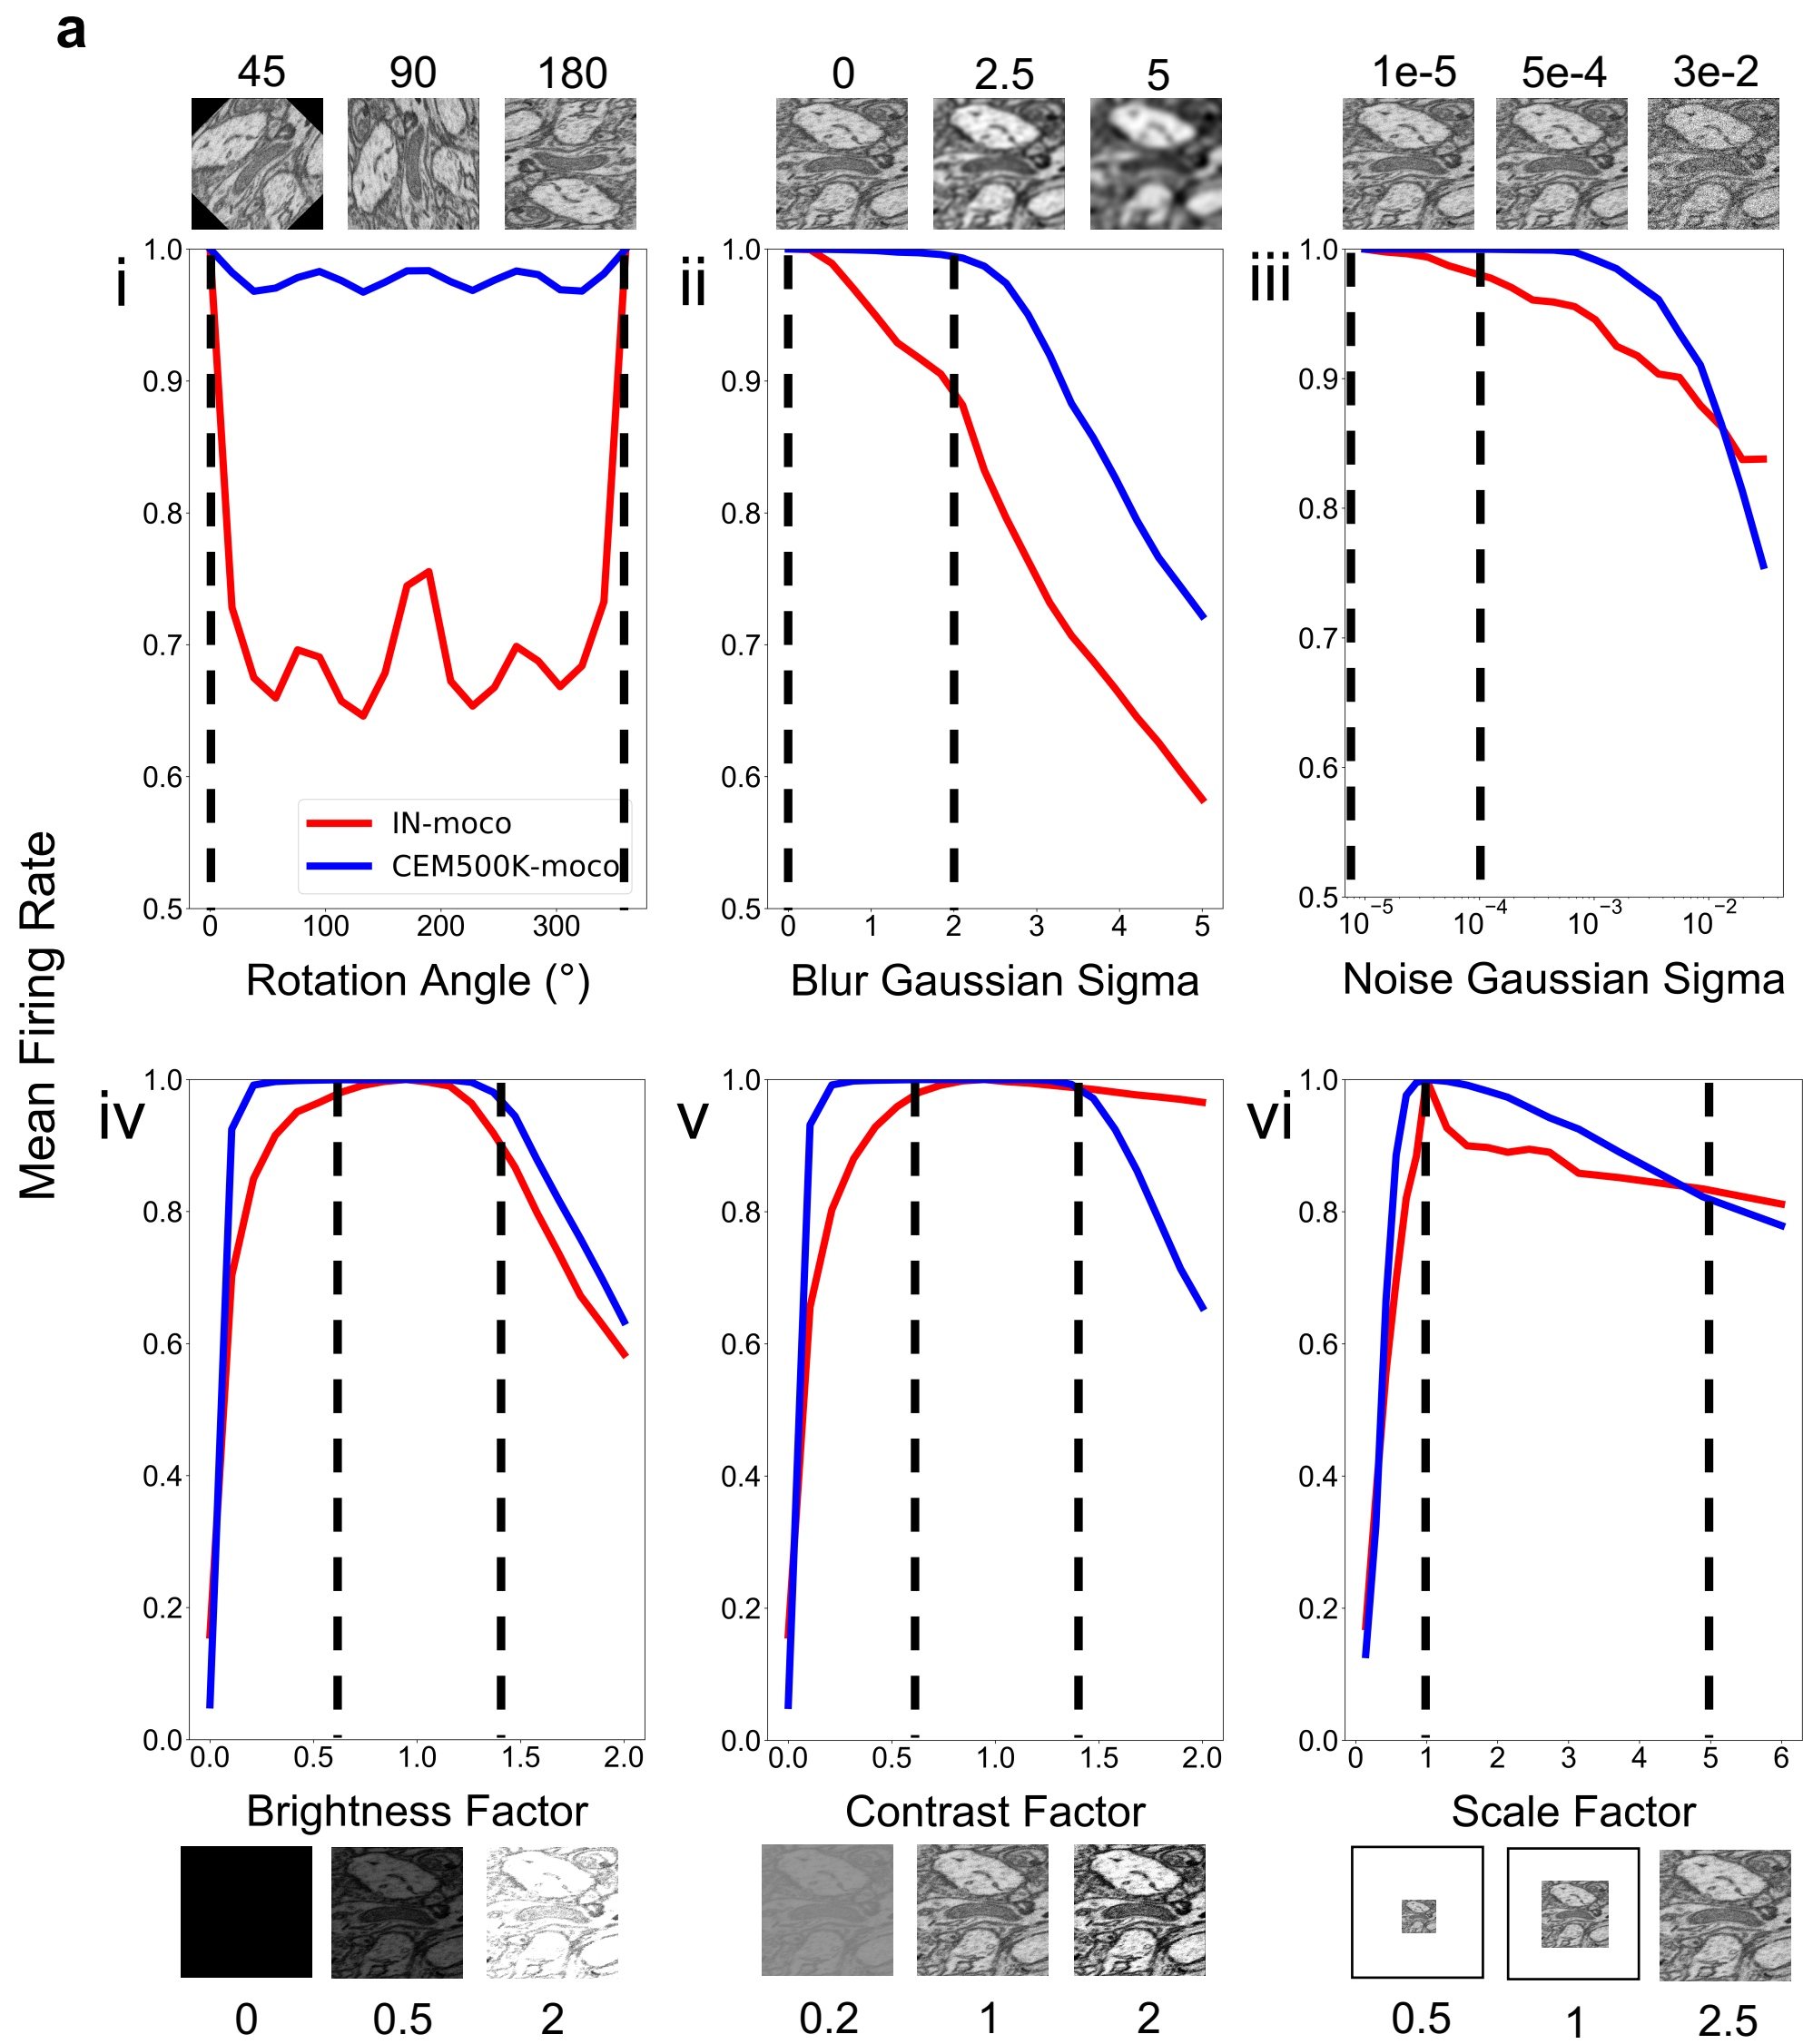

**Figure 3**

**b**

CEM500K-moco

IN-moco

**c**

Occluded Image

Reference Image

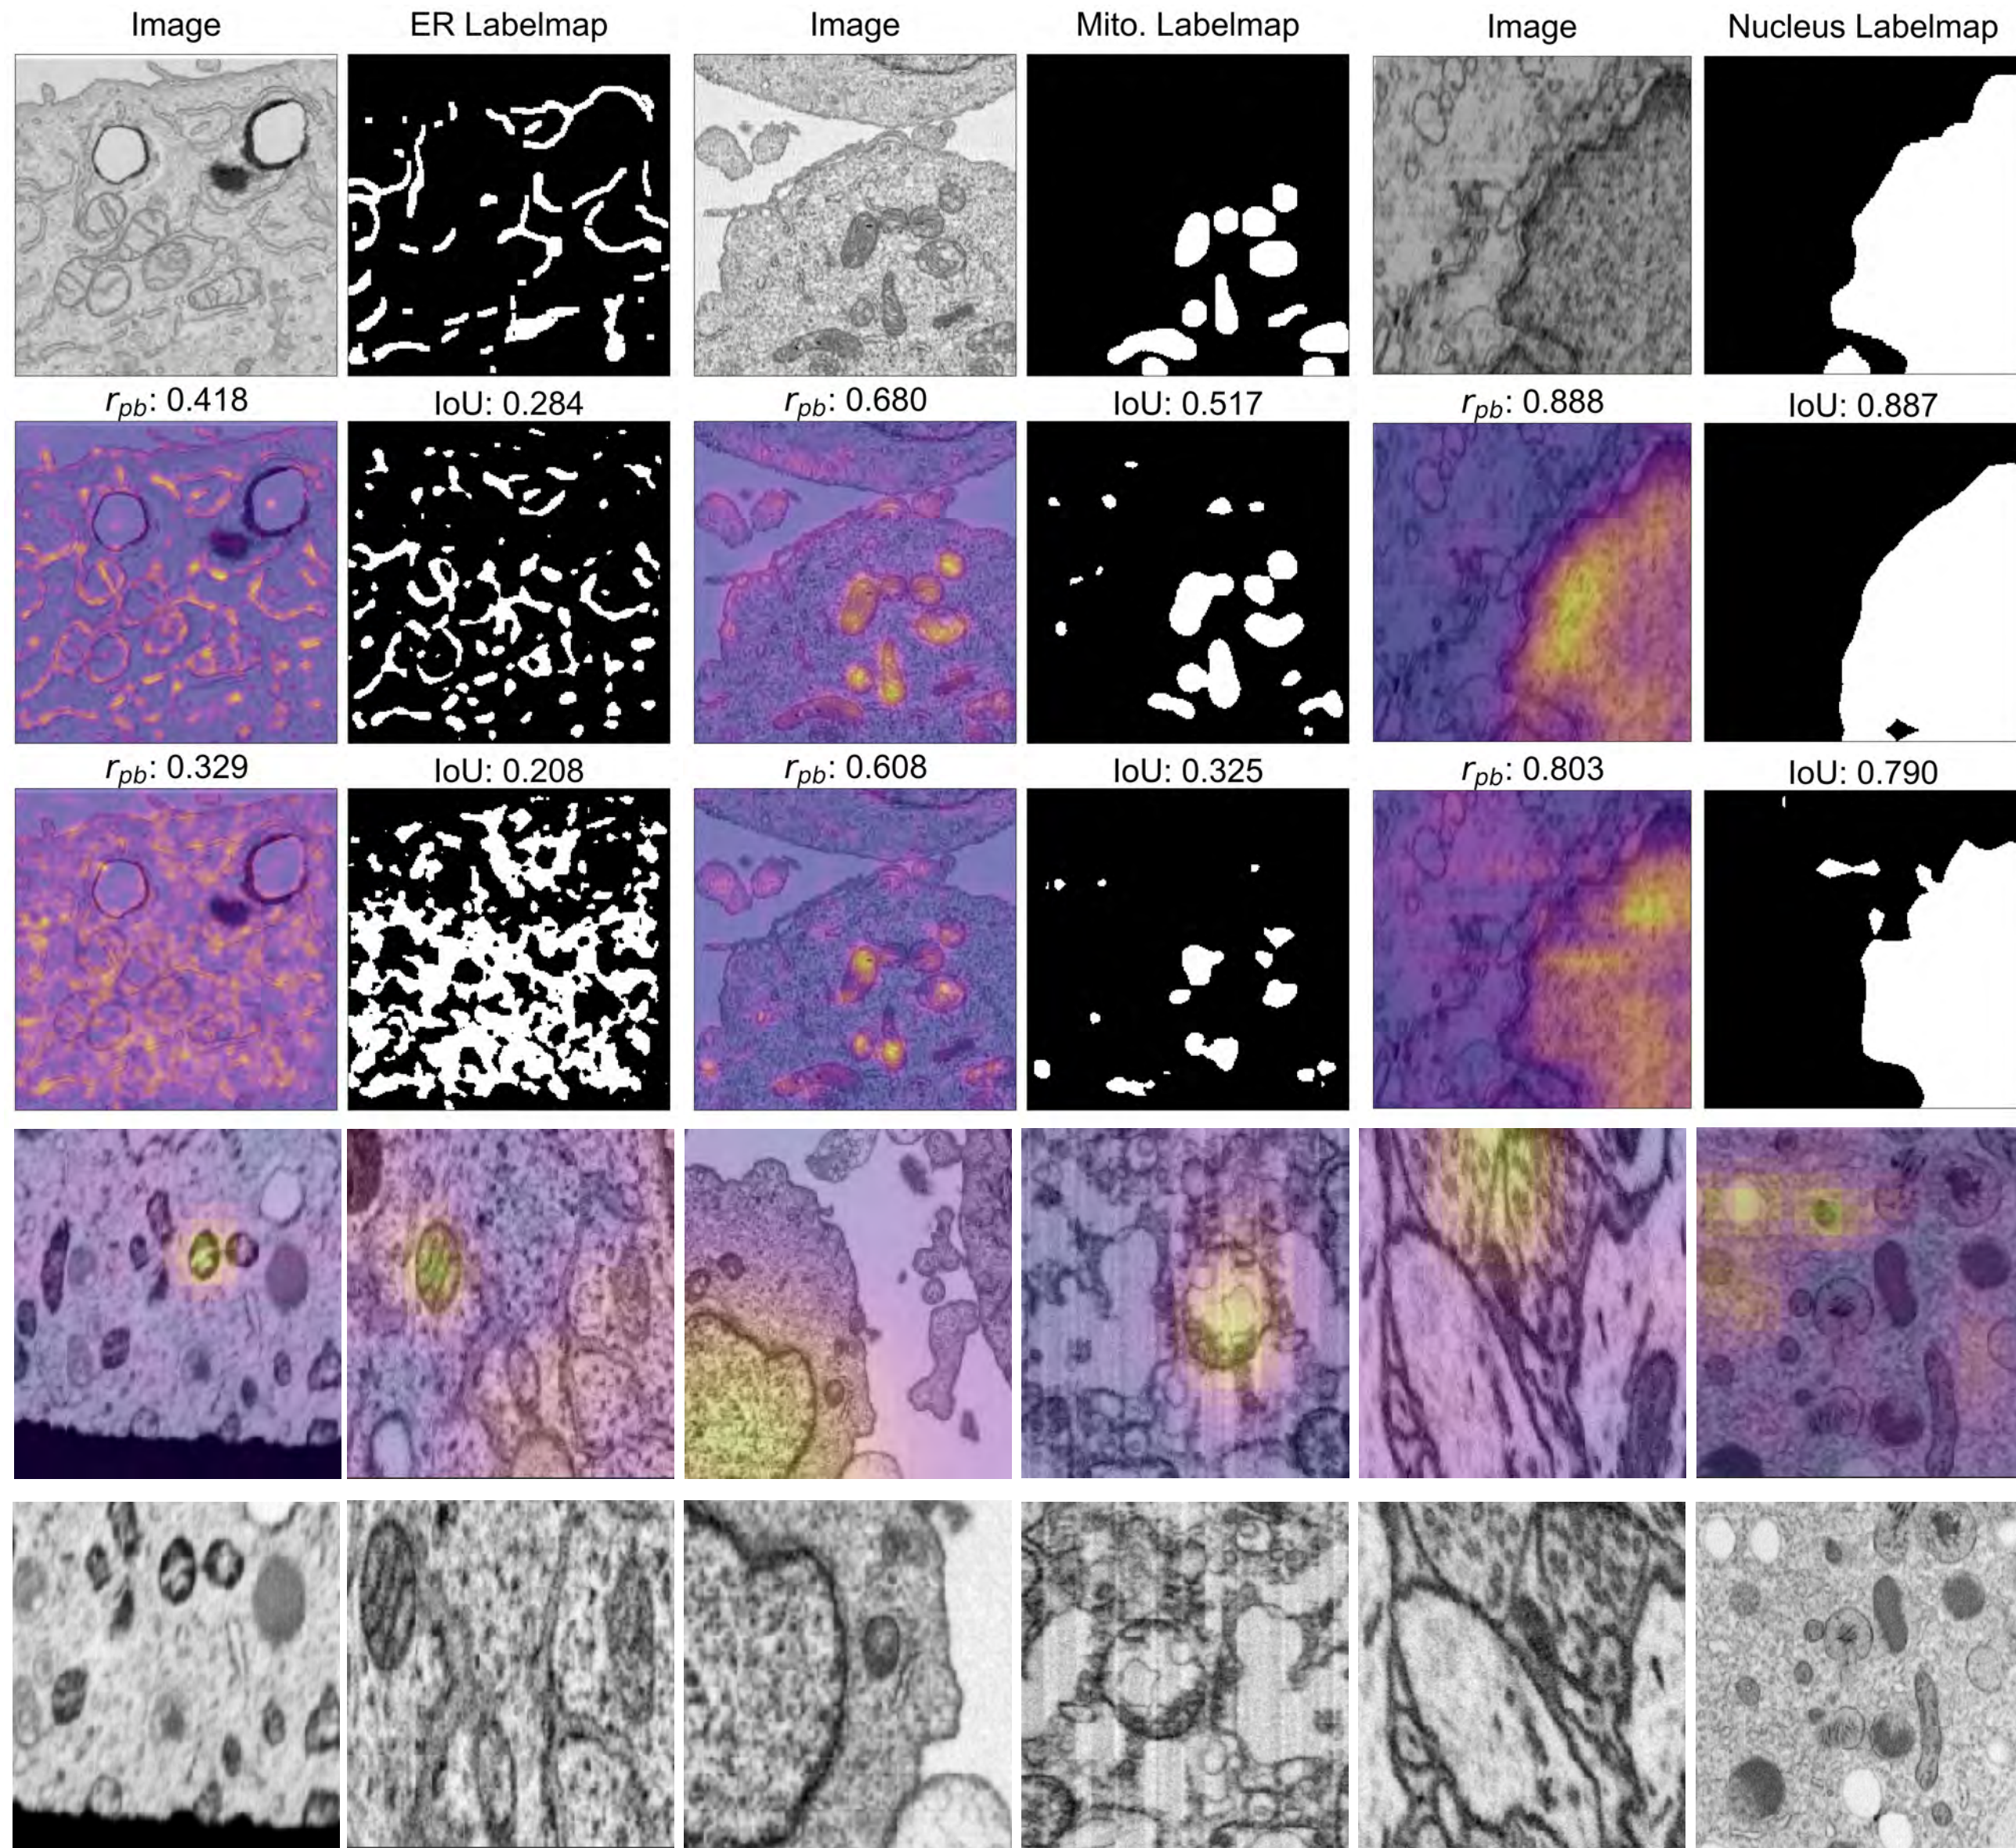

1

0



**Figure 4**

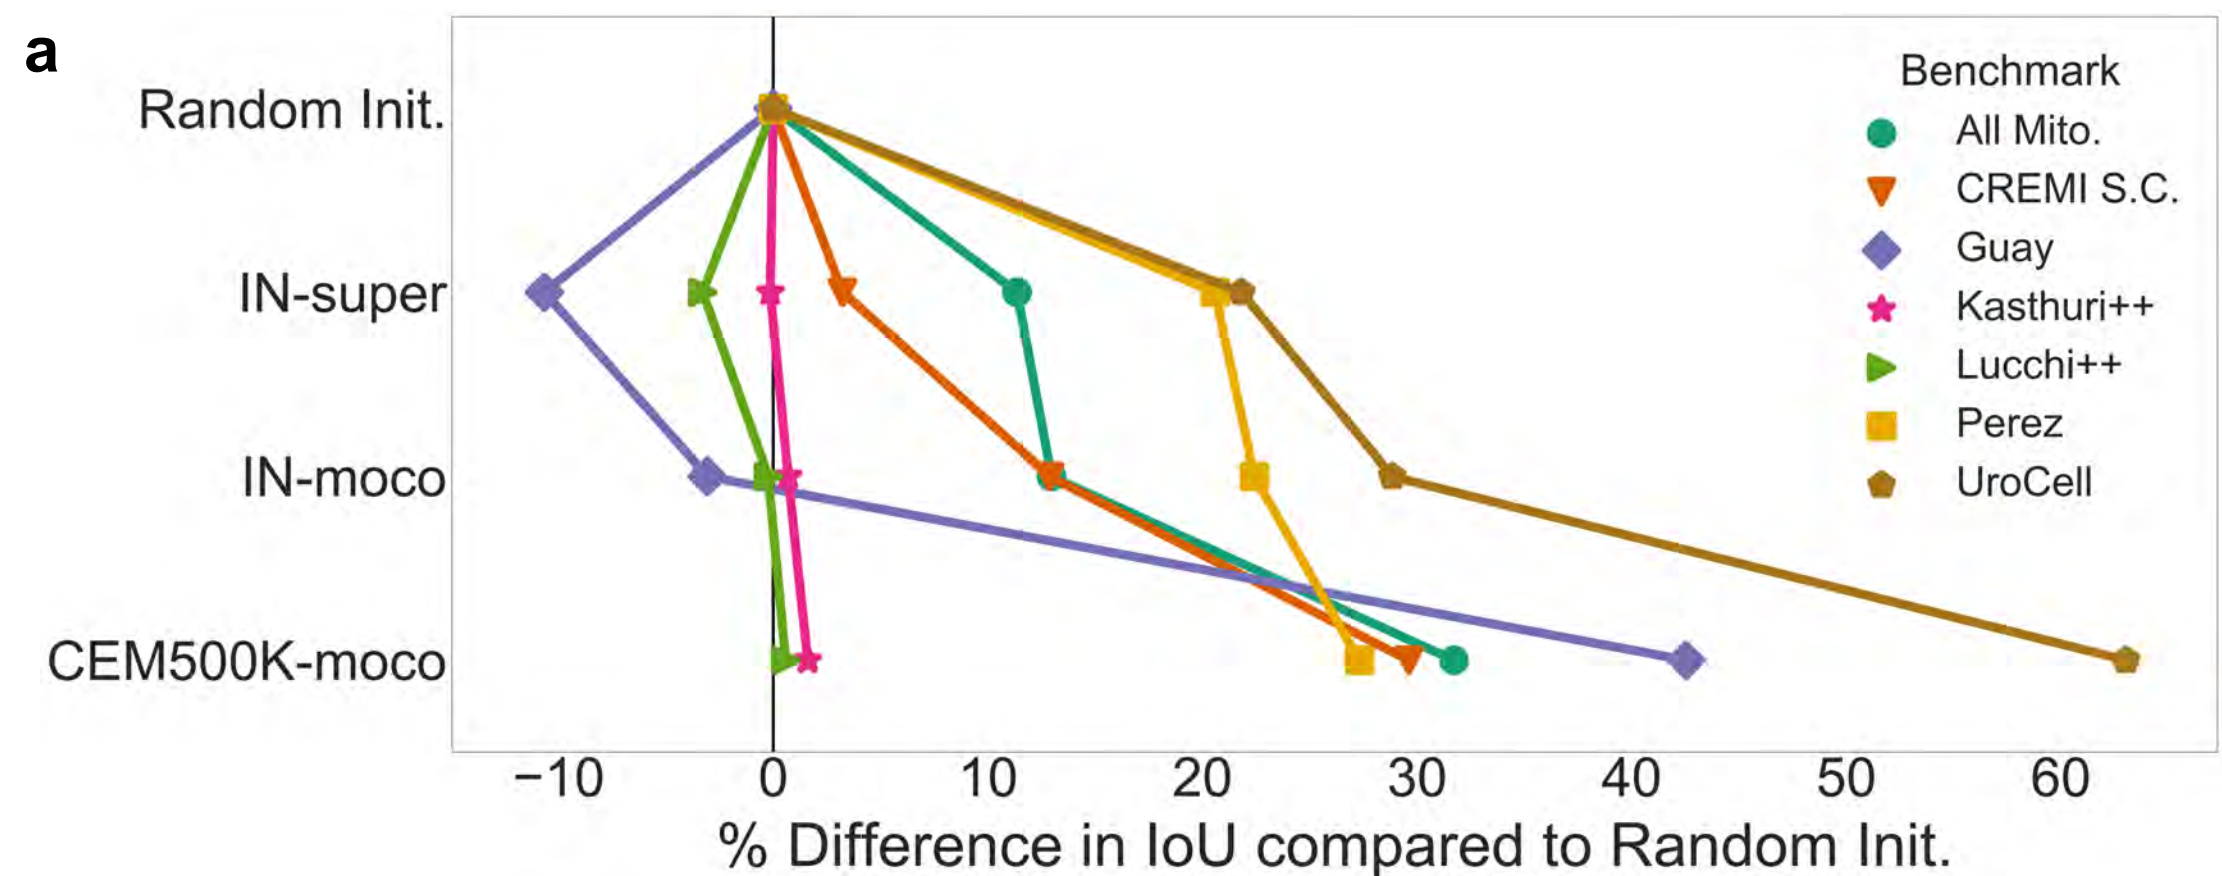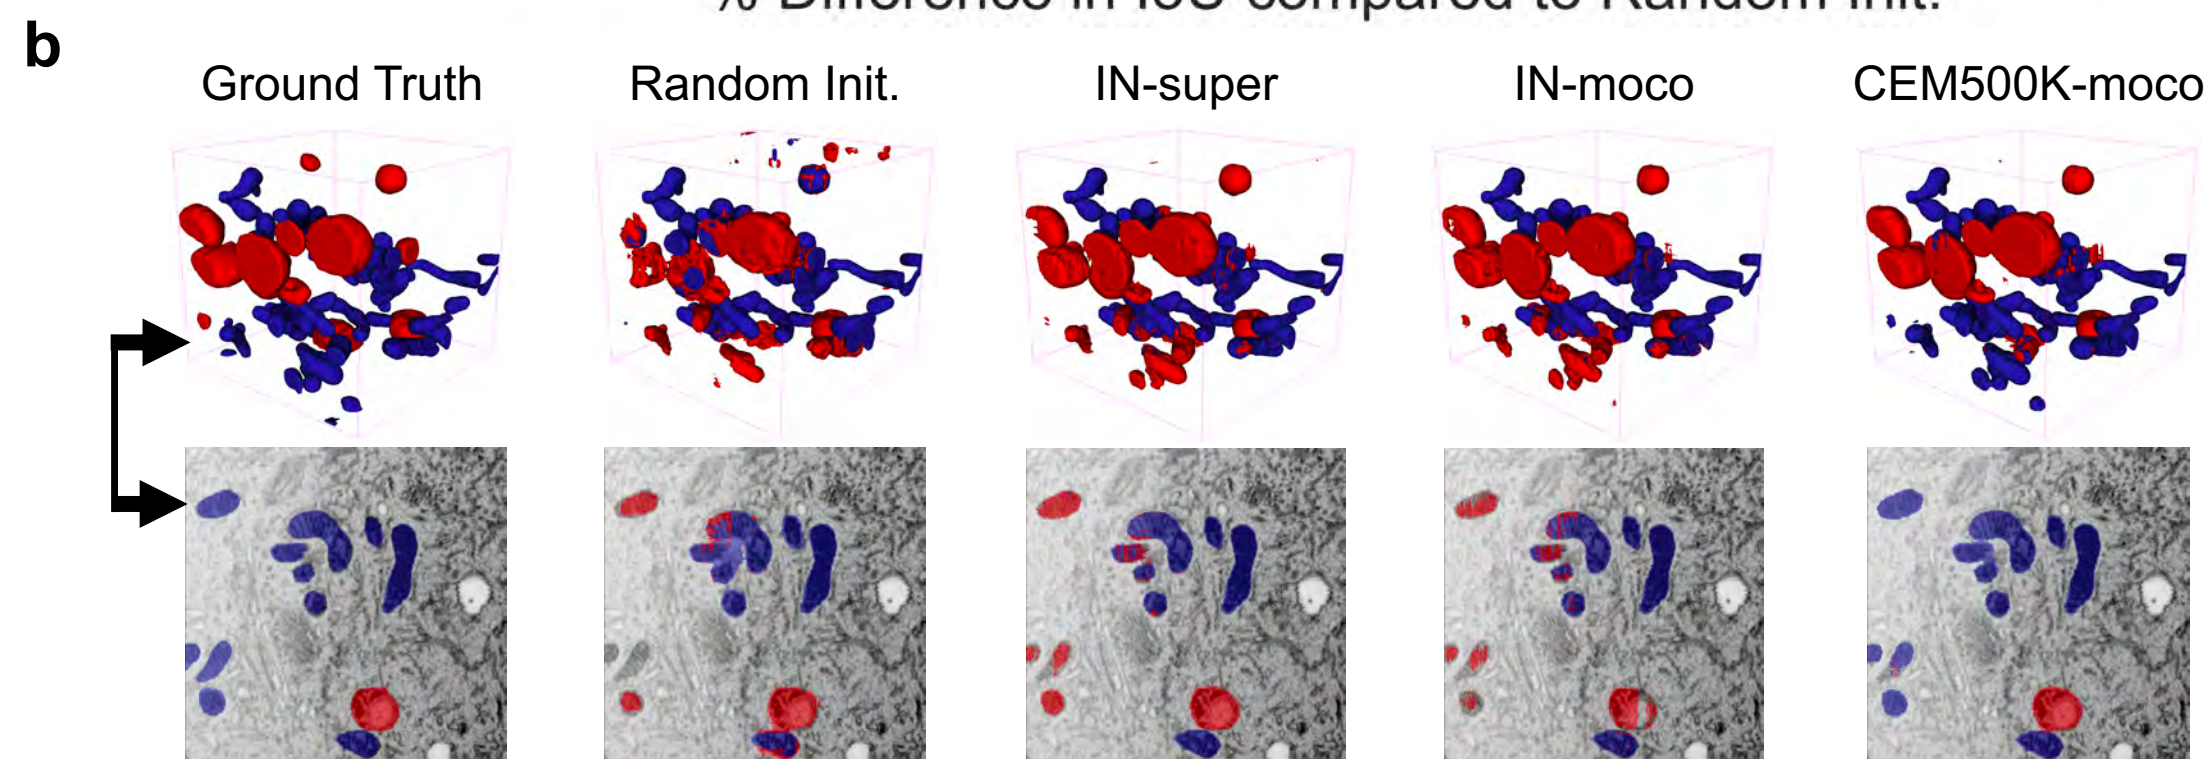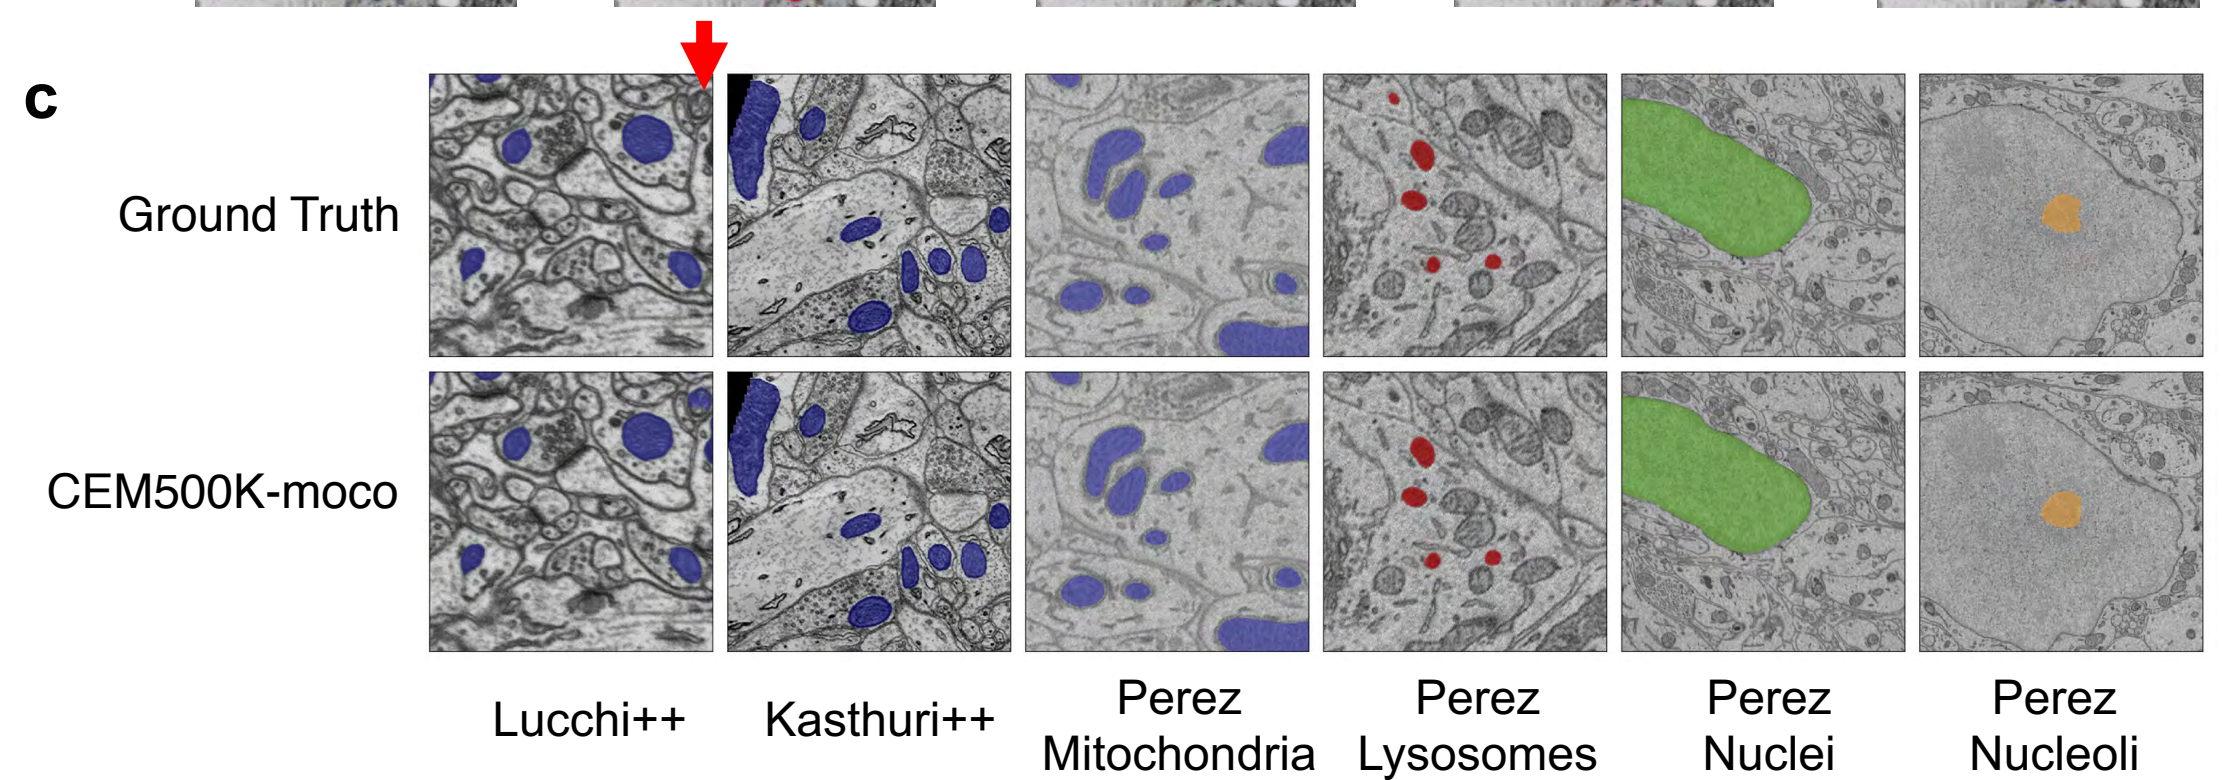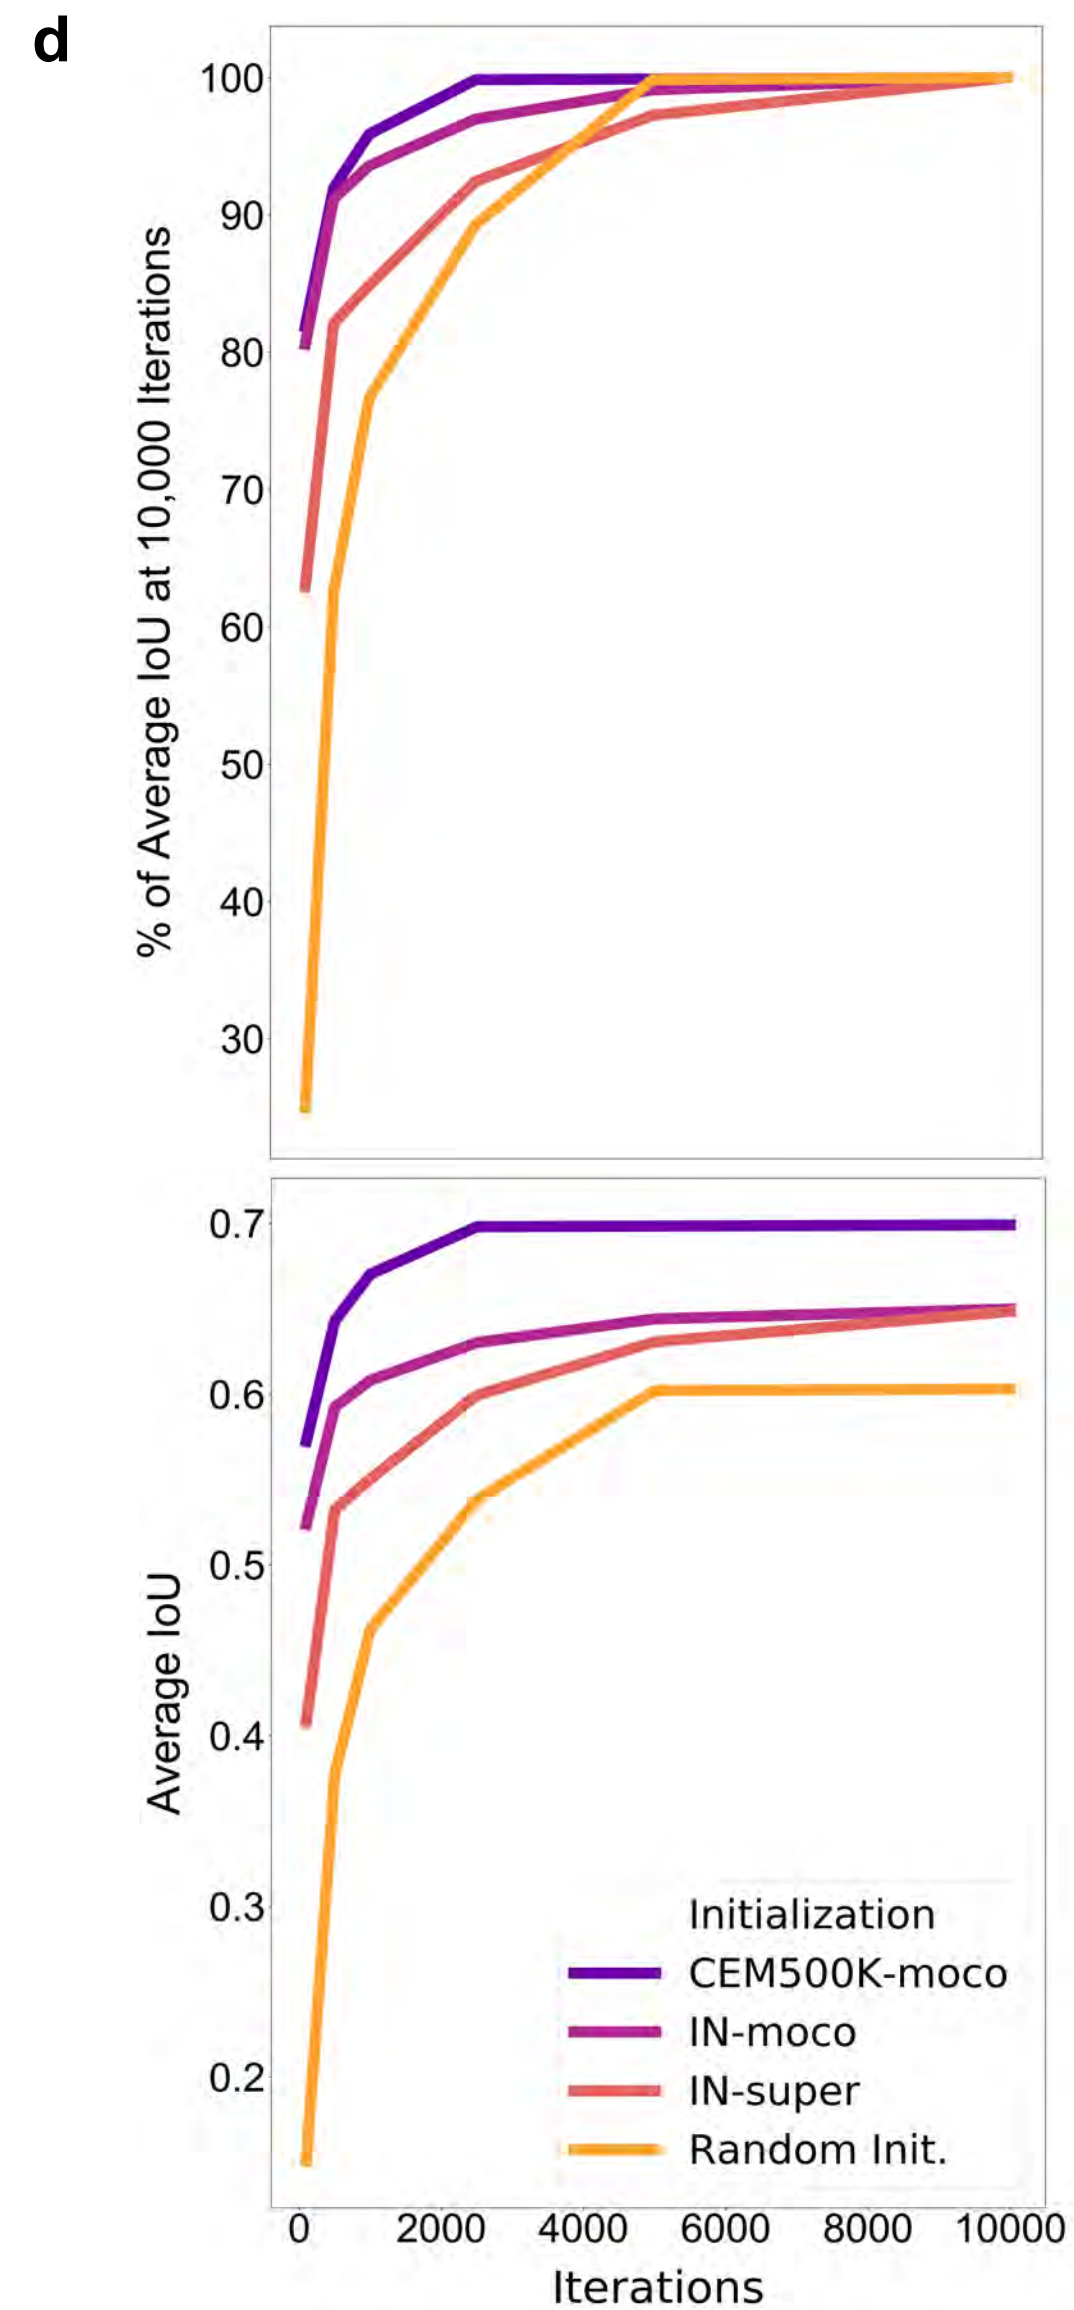

**Table 1**

| <b>Benchmark</b>            | <b>Random Init.<br/>(No Pretraining)</b> | <b>Bloss et al. 2018</b> | <b>CEMraw</b> | <b>CEMdedup</b> | <b>CEM500K</b>      |
|-----------------------------|------------------------------------------|--------------------------|---------------|-----------------|---------------------|
| All Mitochondria            | 0.306                                    | 0.694                    | 0.719         | 0.722           | <b><u>0.745</u></b> |
| CREMI Synaptic Clefts       | 0.000                                    | 0.242                    | 0.254         | 0.259           | <b><u>0.265</u></b> |
| Guay                        | 0.349                                    | 0.380                    | 0.372         | 0.391           | <b><u>0.404</u></b> |
| *Kasthuri++                 | 0.855                                    | 0.907                    | 0.913         | 0.913           | <b><u>0.915</u></b> |
| *Lucchi++                   | 0.788                                    | <b><u>0.899</u></b>      | 0.880         | 0.890           | 0.894               |
| *Perez                      | 0.547                                    | <b><u>0.874</u></b>      | 0.854         | 0.866           | 0.869               |
| UroCell                     | 0.208                                    | 0.638                    | 0.652         | 0.699           | <b><u>0.729</u></b> |
| <b>*Average Mouse Brain</b> | 0.730                                    | <b><u>0.893</u></b>      | 0.883         | 0.890           | <b><u>0.893</u></b> |
| <b>Average Other</b>        | 0.216                                    | 0.489                    | 0.499         | 0.518           | <b><u>0.536</u></b> |

**Table 2**

| <b>Benchmark</b>      | <b>Training Iterations</b> | <b>Random Init.</b> | <b>IN-super</b> | <b>IN-moco</b> | <b>CEM500K-moco</b> | <b>Reported</b> |
|-----------------------|----------------------------|---------------------|-----------------|----------------|---------------------|-----------------|
| All Mitochondria      | 10000                      | 0.586               | 0.653           | 0.662          | <b><u>0.772</u></b> | --              |
| CREMI Synaptic Clefts | 5000                       | 0.000               | 0.206           | 0.226          | <b><u>0.259</u></b> | --              |
| Guay [15]             | 1000                       | 0.310               | 0.277           | 0.300          | <b><u>0.441</u></b> | 0.417           |
| Kasthuri++ [17]       | 10000                      | 0.904               | 0.903           | 0.910          | <b><u>0.918</u></b> | 0.845           |
| Lucchi++ [17]         | 10000                      | 0.894               | 0.865           | 0.892          | <b><u>0.899</u></b> | 0.888           |
| Perez [18]            | 2500                       | 0.710               | 0.856           | 0.869          | <b><u>0.904</u></b> | 0.821           |
| Lysosomes             | --                         | 0.844               | 0.758           | 0.791          | <b><u>0.867</u></b> | 0.726           |
| Mitochondria          | --                         | 0.375               | 0.835           | 0.852          | <b><u>0.876</u></b> | 0.780           |
| Nuclei                | --                         | 0.984               | 0.985           | 0.985          | <b><u>0.989</u></b> | 0.942           |
| Nucleoli              | --                         | 0.636               | 0.846           | 0.847          | <b><u>0.879</u></b> | 0.835           |
| UroCell               | 2500                       | 0.480               | 0.584           | 0.618          | <b><u>0.782</u></b> | --              |

## Supplementary Table 1

| Benchmark             | Biological Context(s)                        | Imaging Technique(s)    | Voxel Size (nm)                             | Dimensionality | Training Set Pixels/Voxels | Test Set Pixels/Voxels | Segmentation Class(es)                                                                  |
|-----------------------|----------------------------------------------|-------------------------|---------------------------------------------|----------------|----------------------------|------------------------|-----------------------------------------------------------------------------------------|
| All Mitochondria      | Mouse Bladder, Mouse Brain & Human Platelets | SBF-SEM, FIB-SEM, ssSEM | 10x10x50, 5x5x5, 3x3x29, 30x30x30, 16x16x15 | 2D and 3D      | 4.42E+08                   | 3.71E+08               | Mitochondria                                                                            |
| CREMI Synaptic Clefts | Drosophila Brain                             | ssTEM                   | 4x4x40                                      | 3D             | 3.91E+08                   | 1.95E+08               | Synaptic Clefts                                                                         |
| Guay                  | Human Platelets                              | SBF-SEM                 | 10x10x50                                    | 3D             | 3.20E+07                   | 2.95E+07               | Mitochondria, Canalicular Channels, Alpha Granules, Dense Granules, Dense Granule Cores |
| Lucchi++              | Mouse Brain                                  | FIB-SEM                 | 5x5x5                                       | 2D             | 1.30E+08                   | 1.30E+08               | Mitochondria                                                                            |
| Kasthuri++            | Mouse Brain                                  | ssSEM                   | 3x3x29                                      | 2D             | 2.01E+08                   | 1.55E+08               | Mitochondria                                                                            |
| Perez                 | Mouse Brain                                  | SBF-SEM                 | 30x30x30                                    | 2D             | 1.25E+07                   | 4.00E+07               | Mitochondria, Lysosomes, Nuclei, Nucleoli                                               |
| UroCell               | Mouse Bladder                                | FIB-SEM                 | 16x16x15                                    | 3D             | 6.71E+07                   | 1.68E+07               | Mitochondria, Lysosomes                                                                 |

# Supplementary Figure 1

**a**

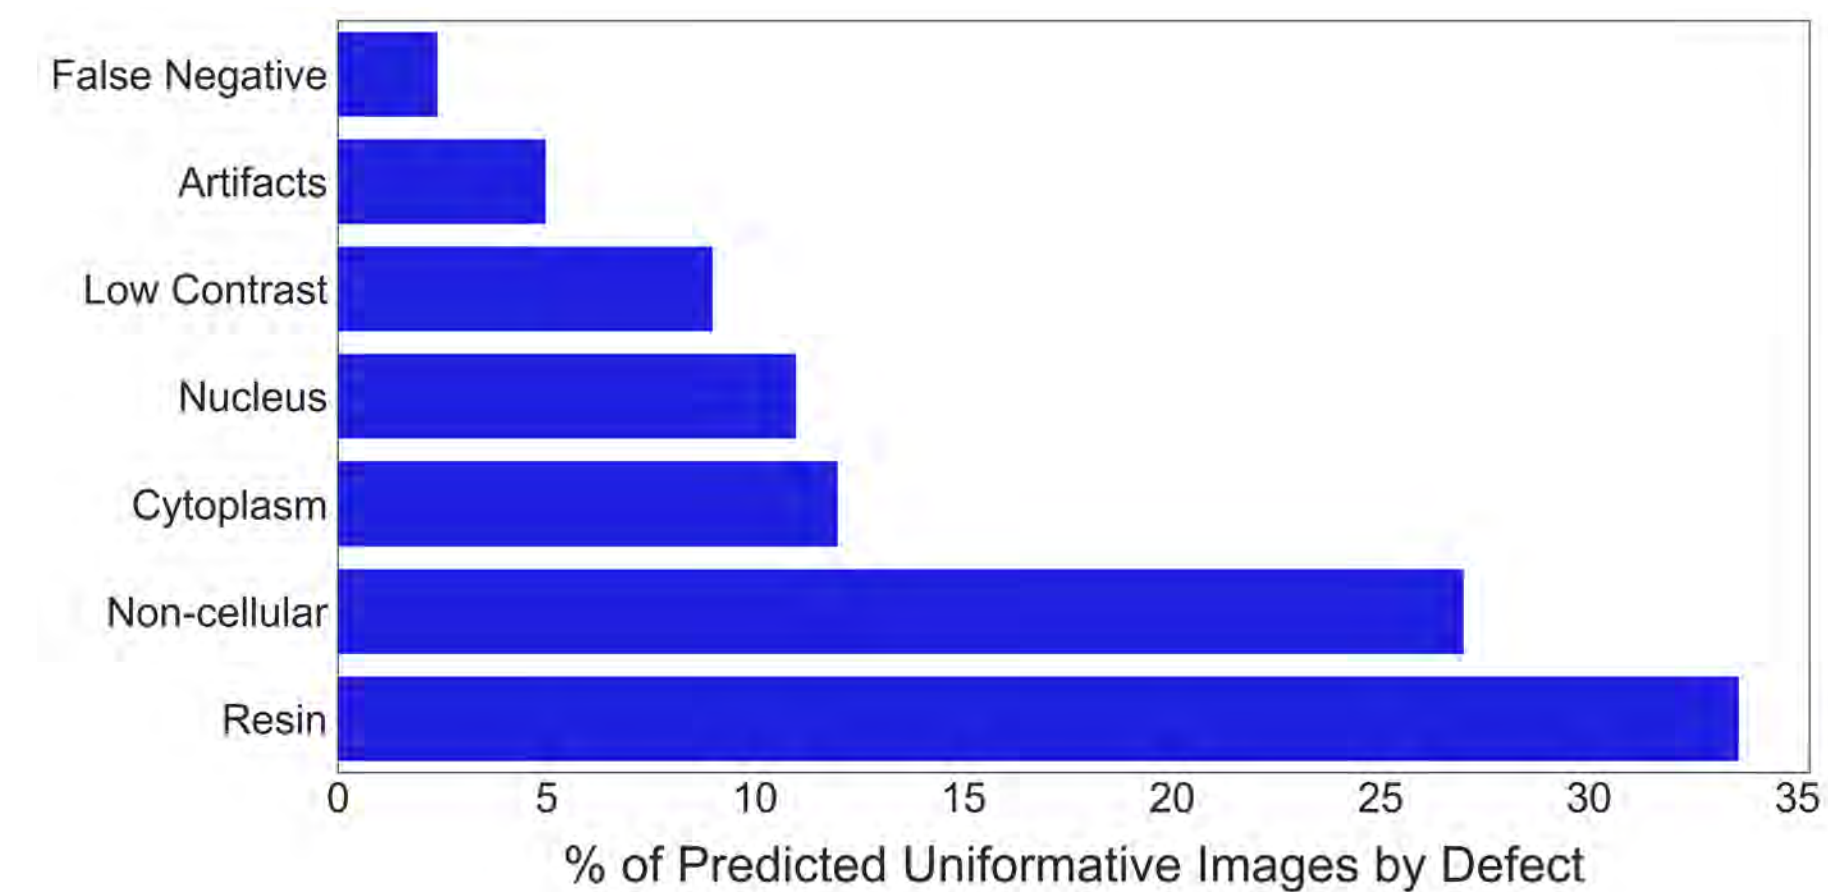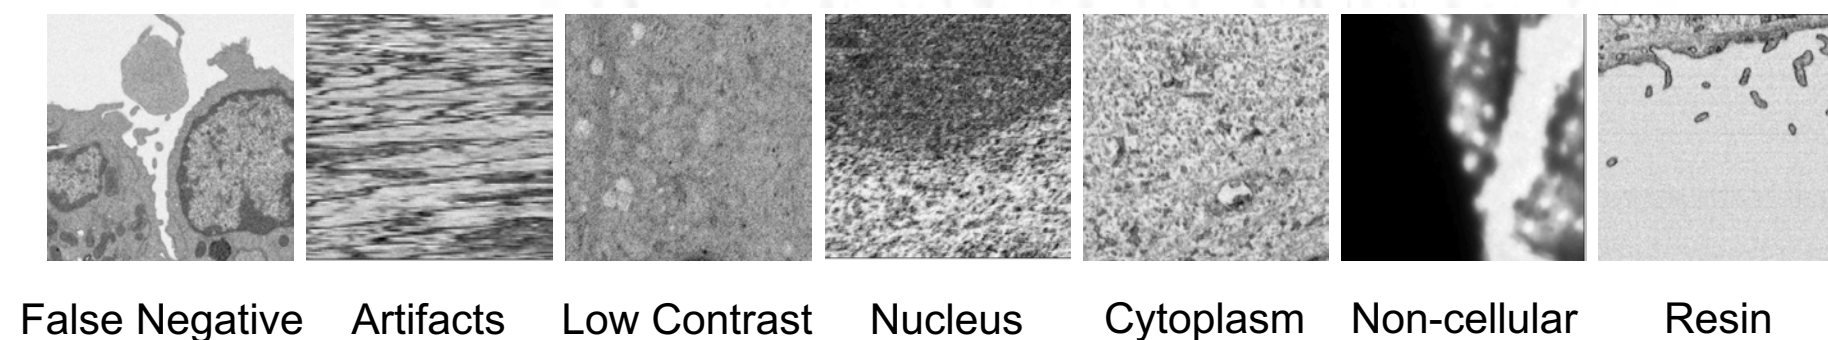

**b**

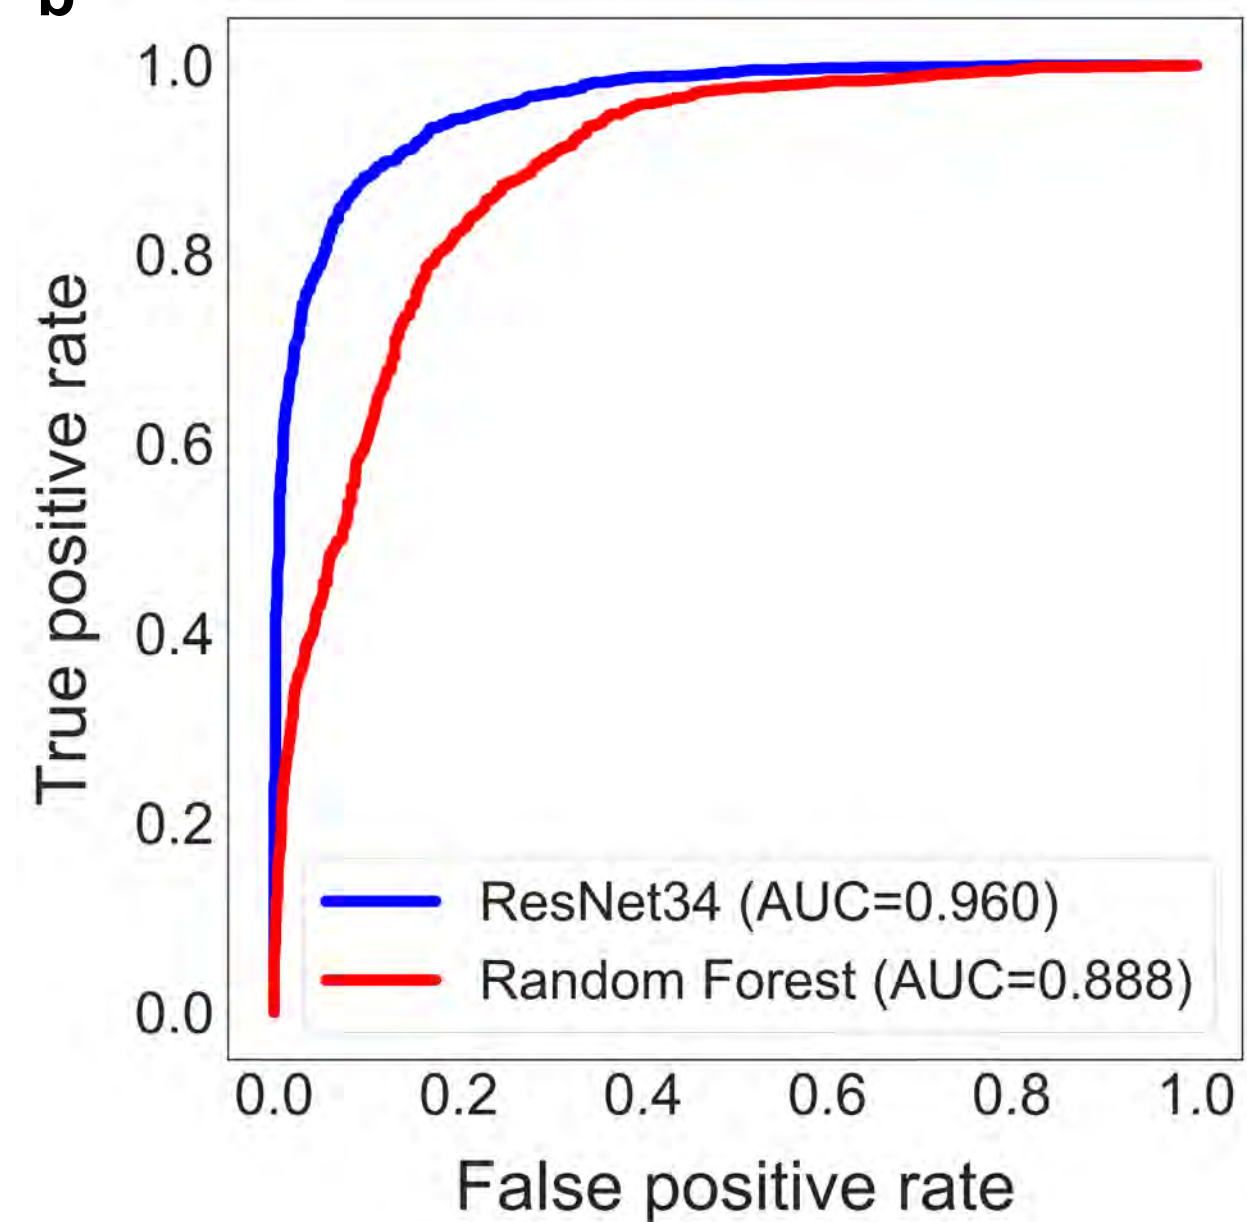

## Supplementary Figure 2

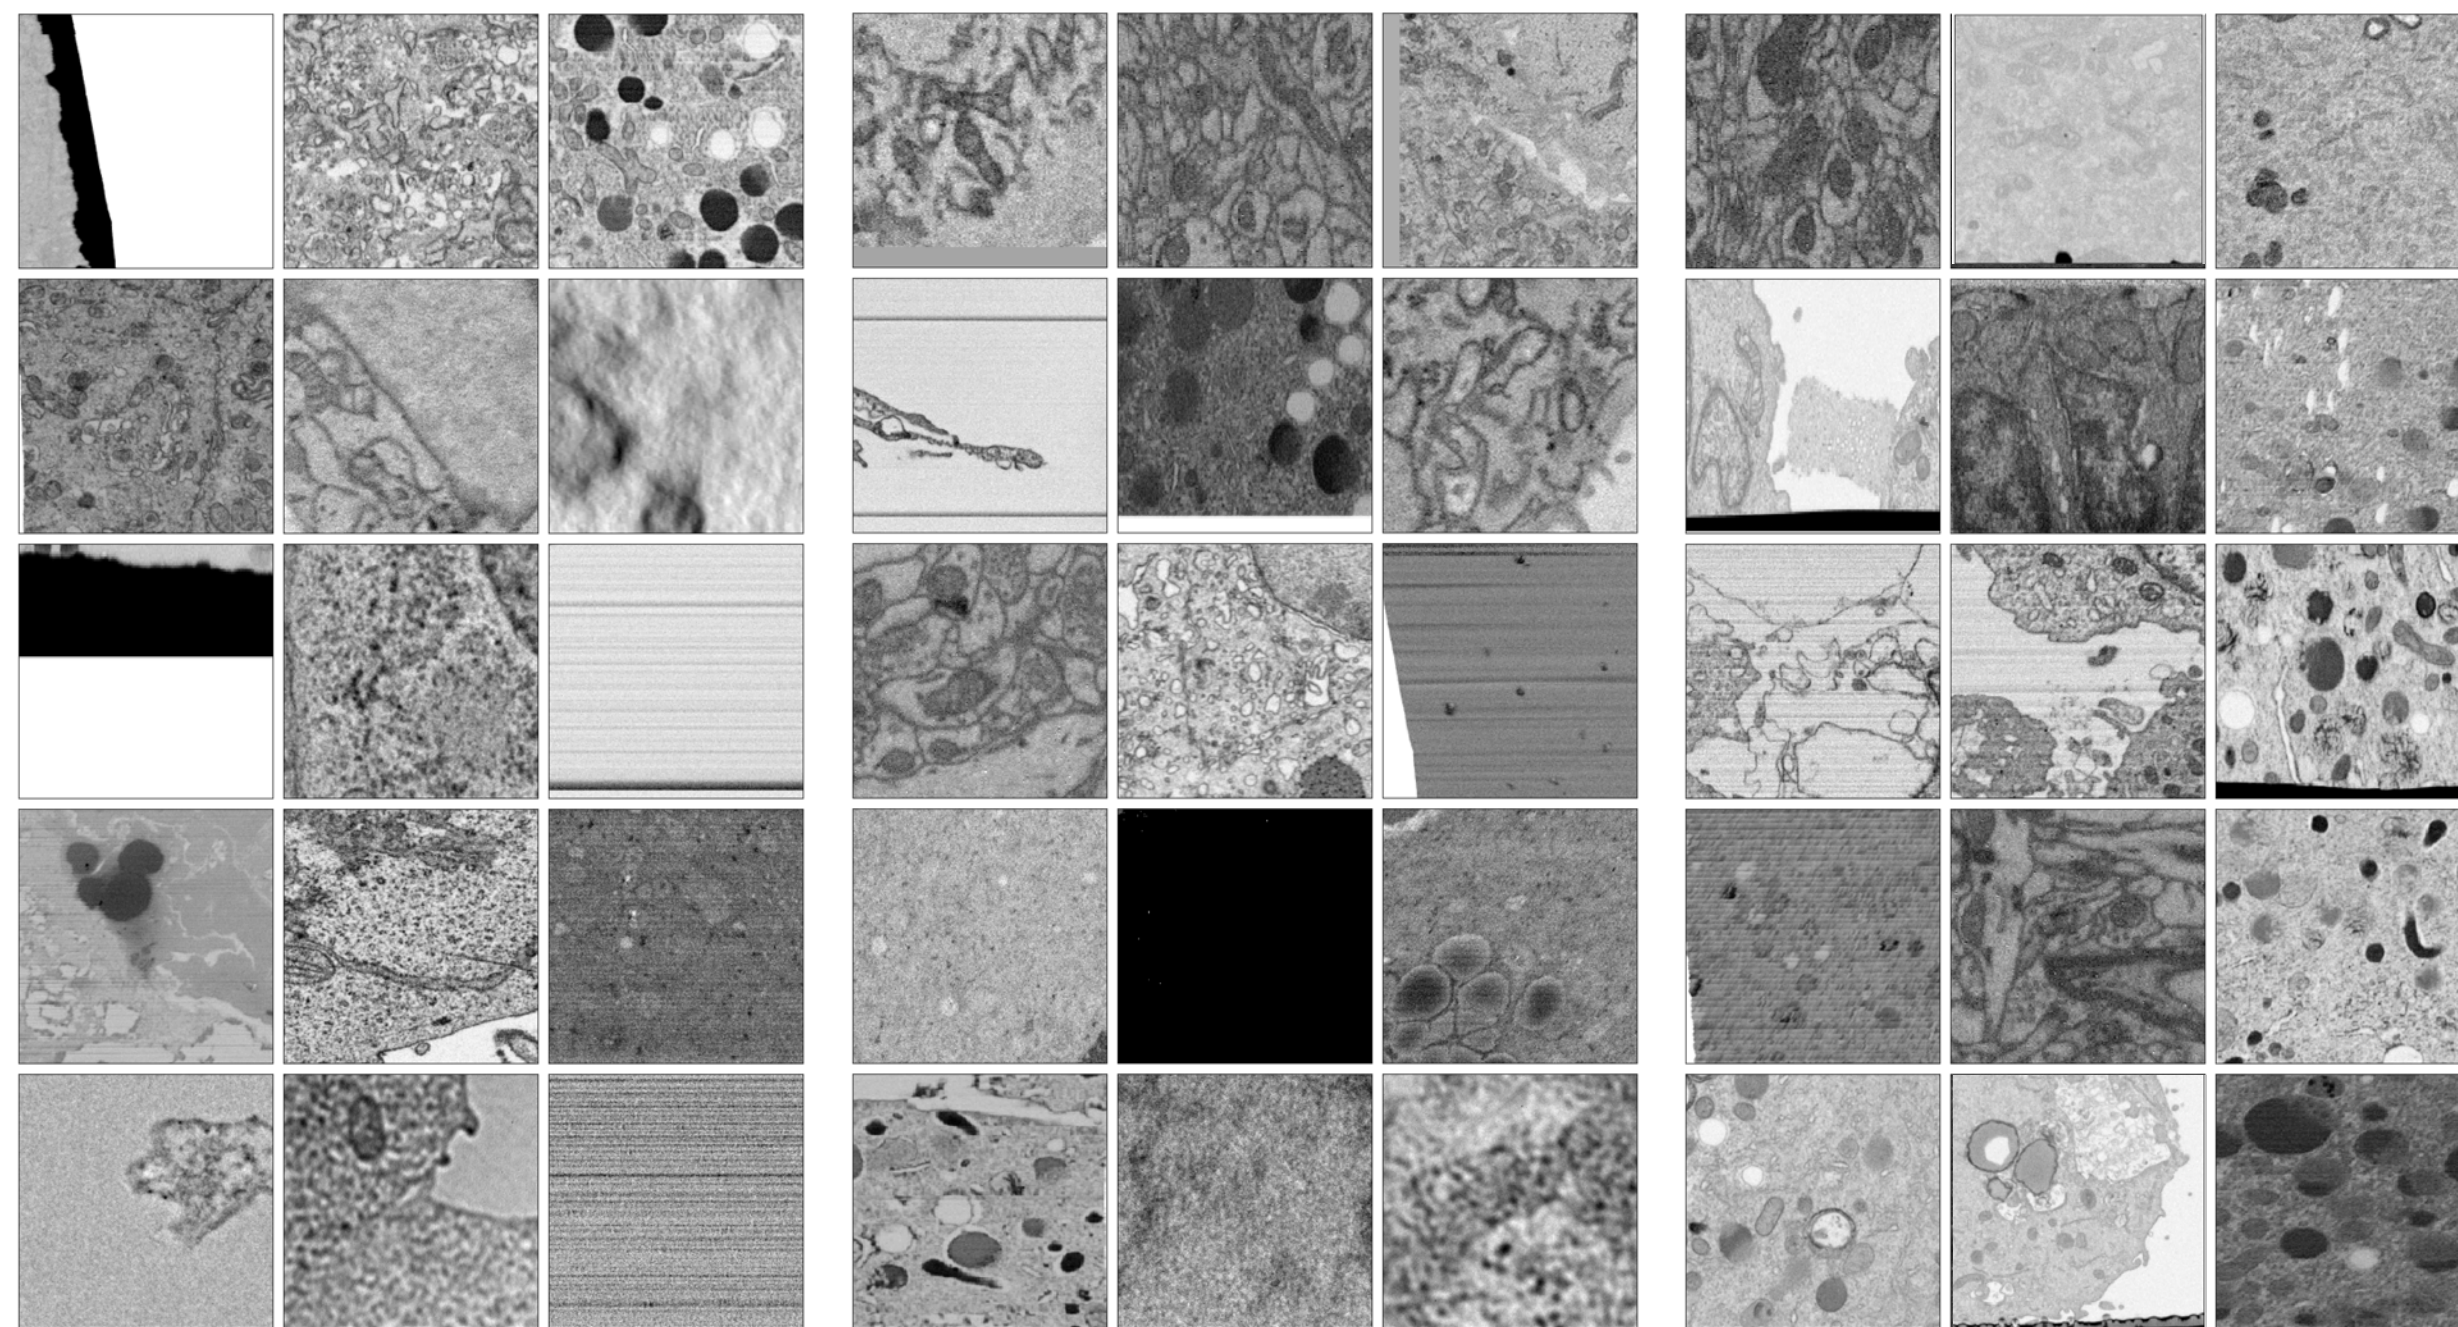

CEMraw

CEMdedup

CEM500K

# Supplementary Figure 3

a

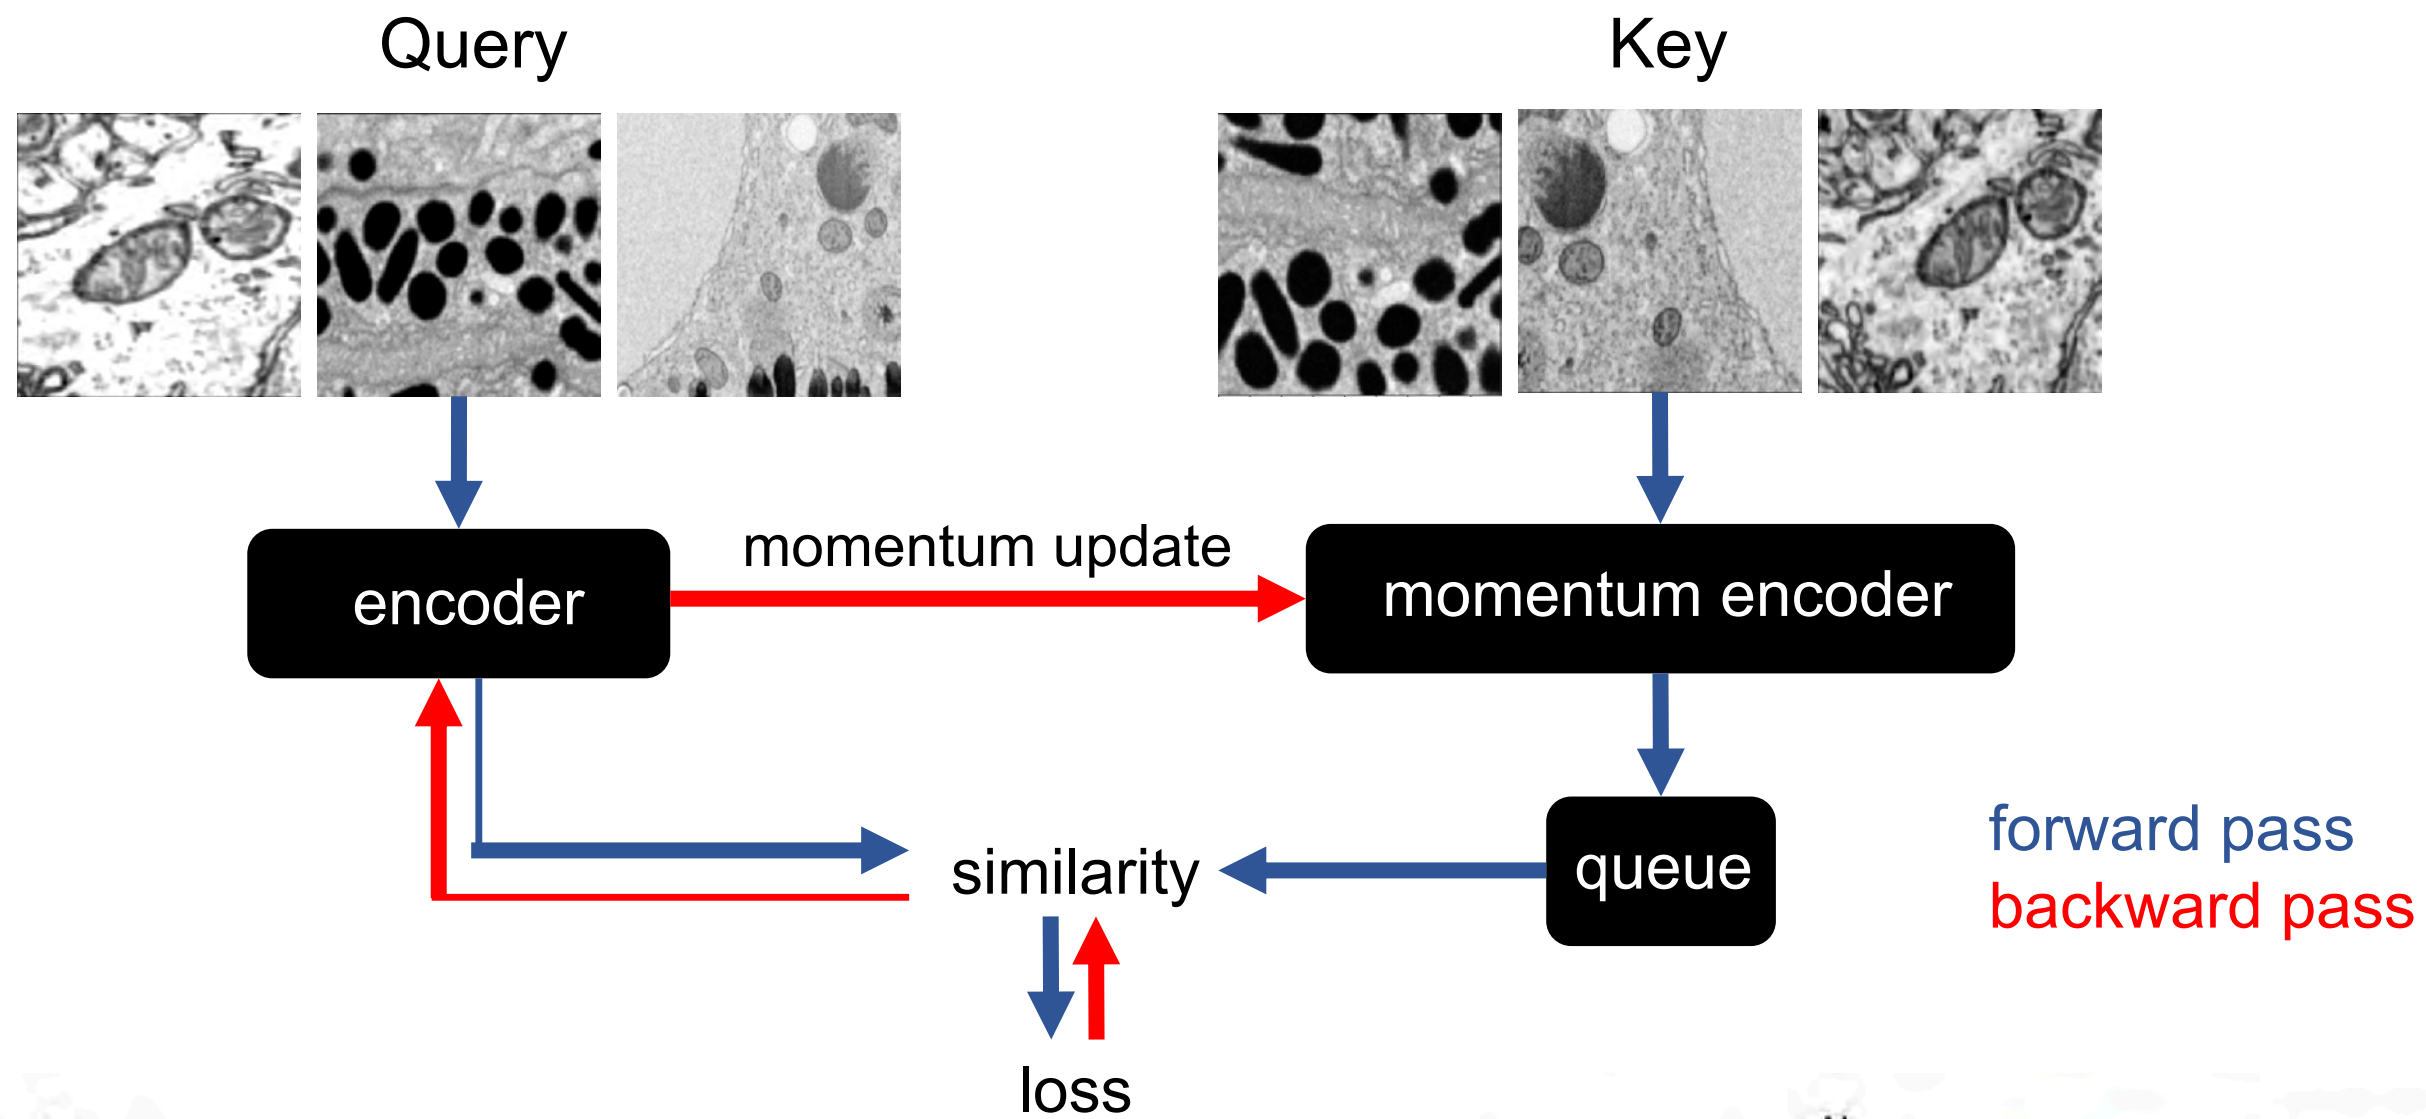

b

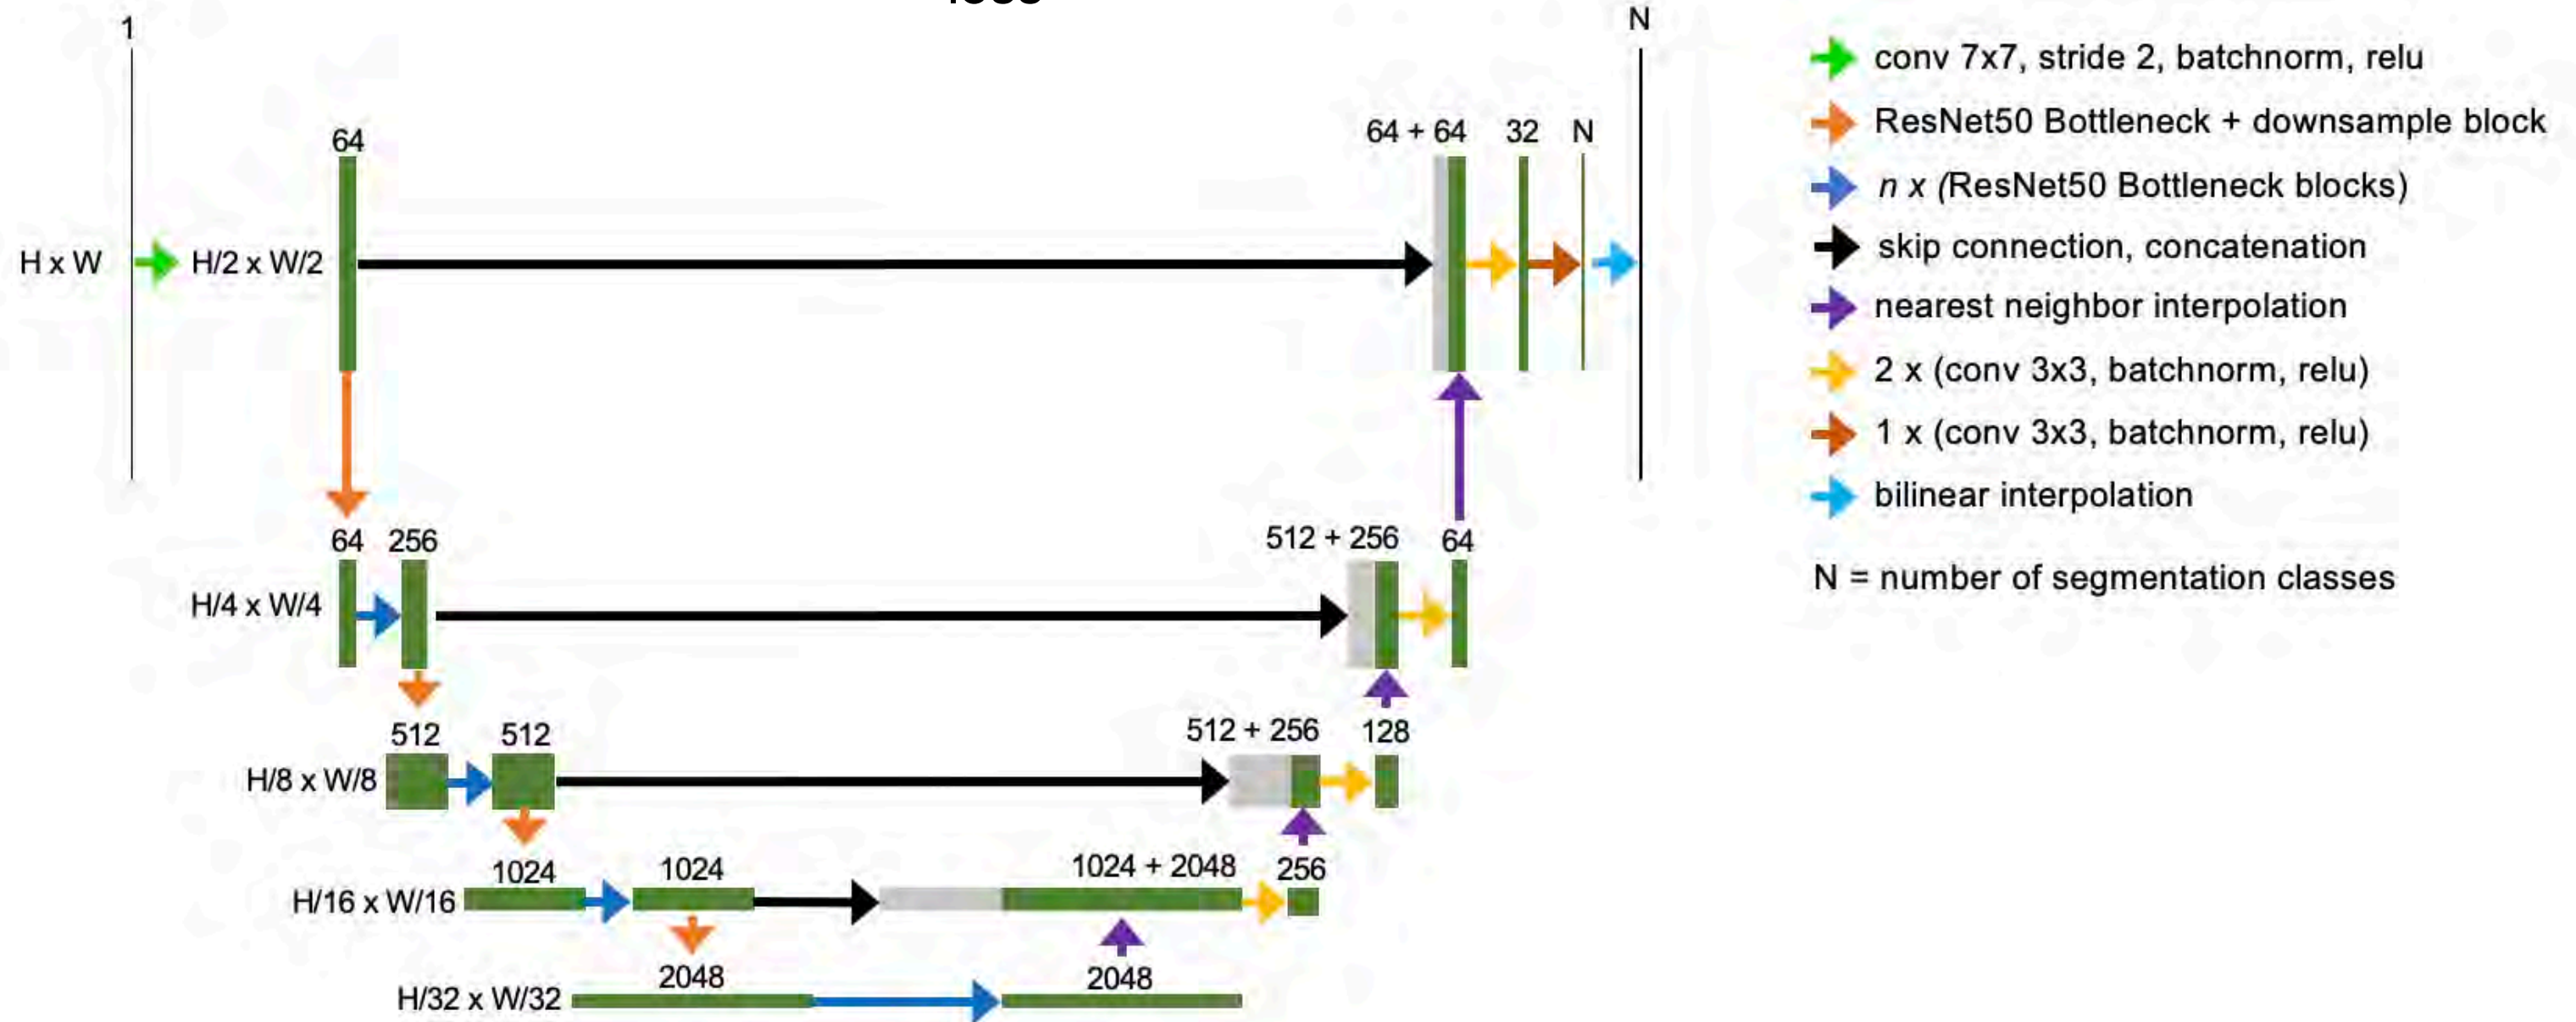

# Supplementary Figure 4

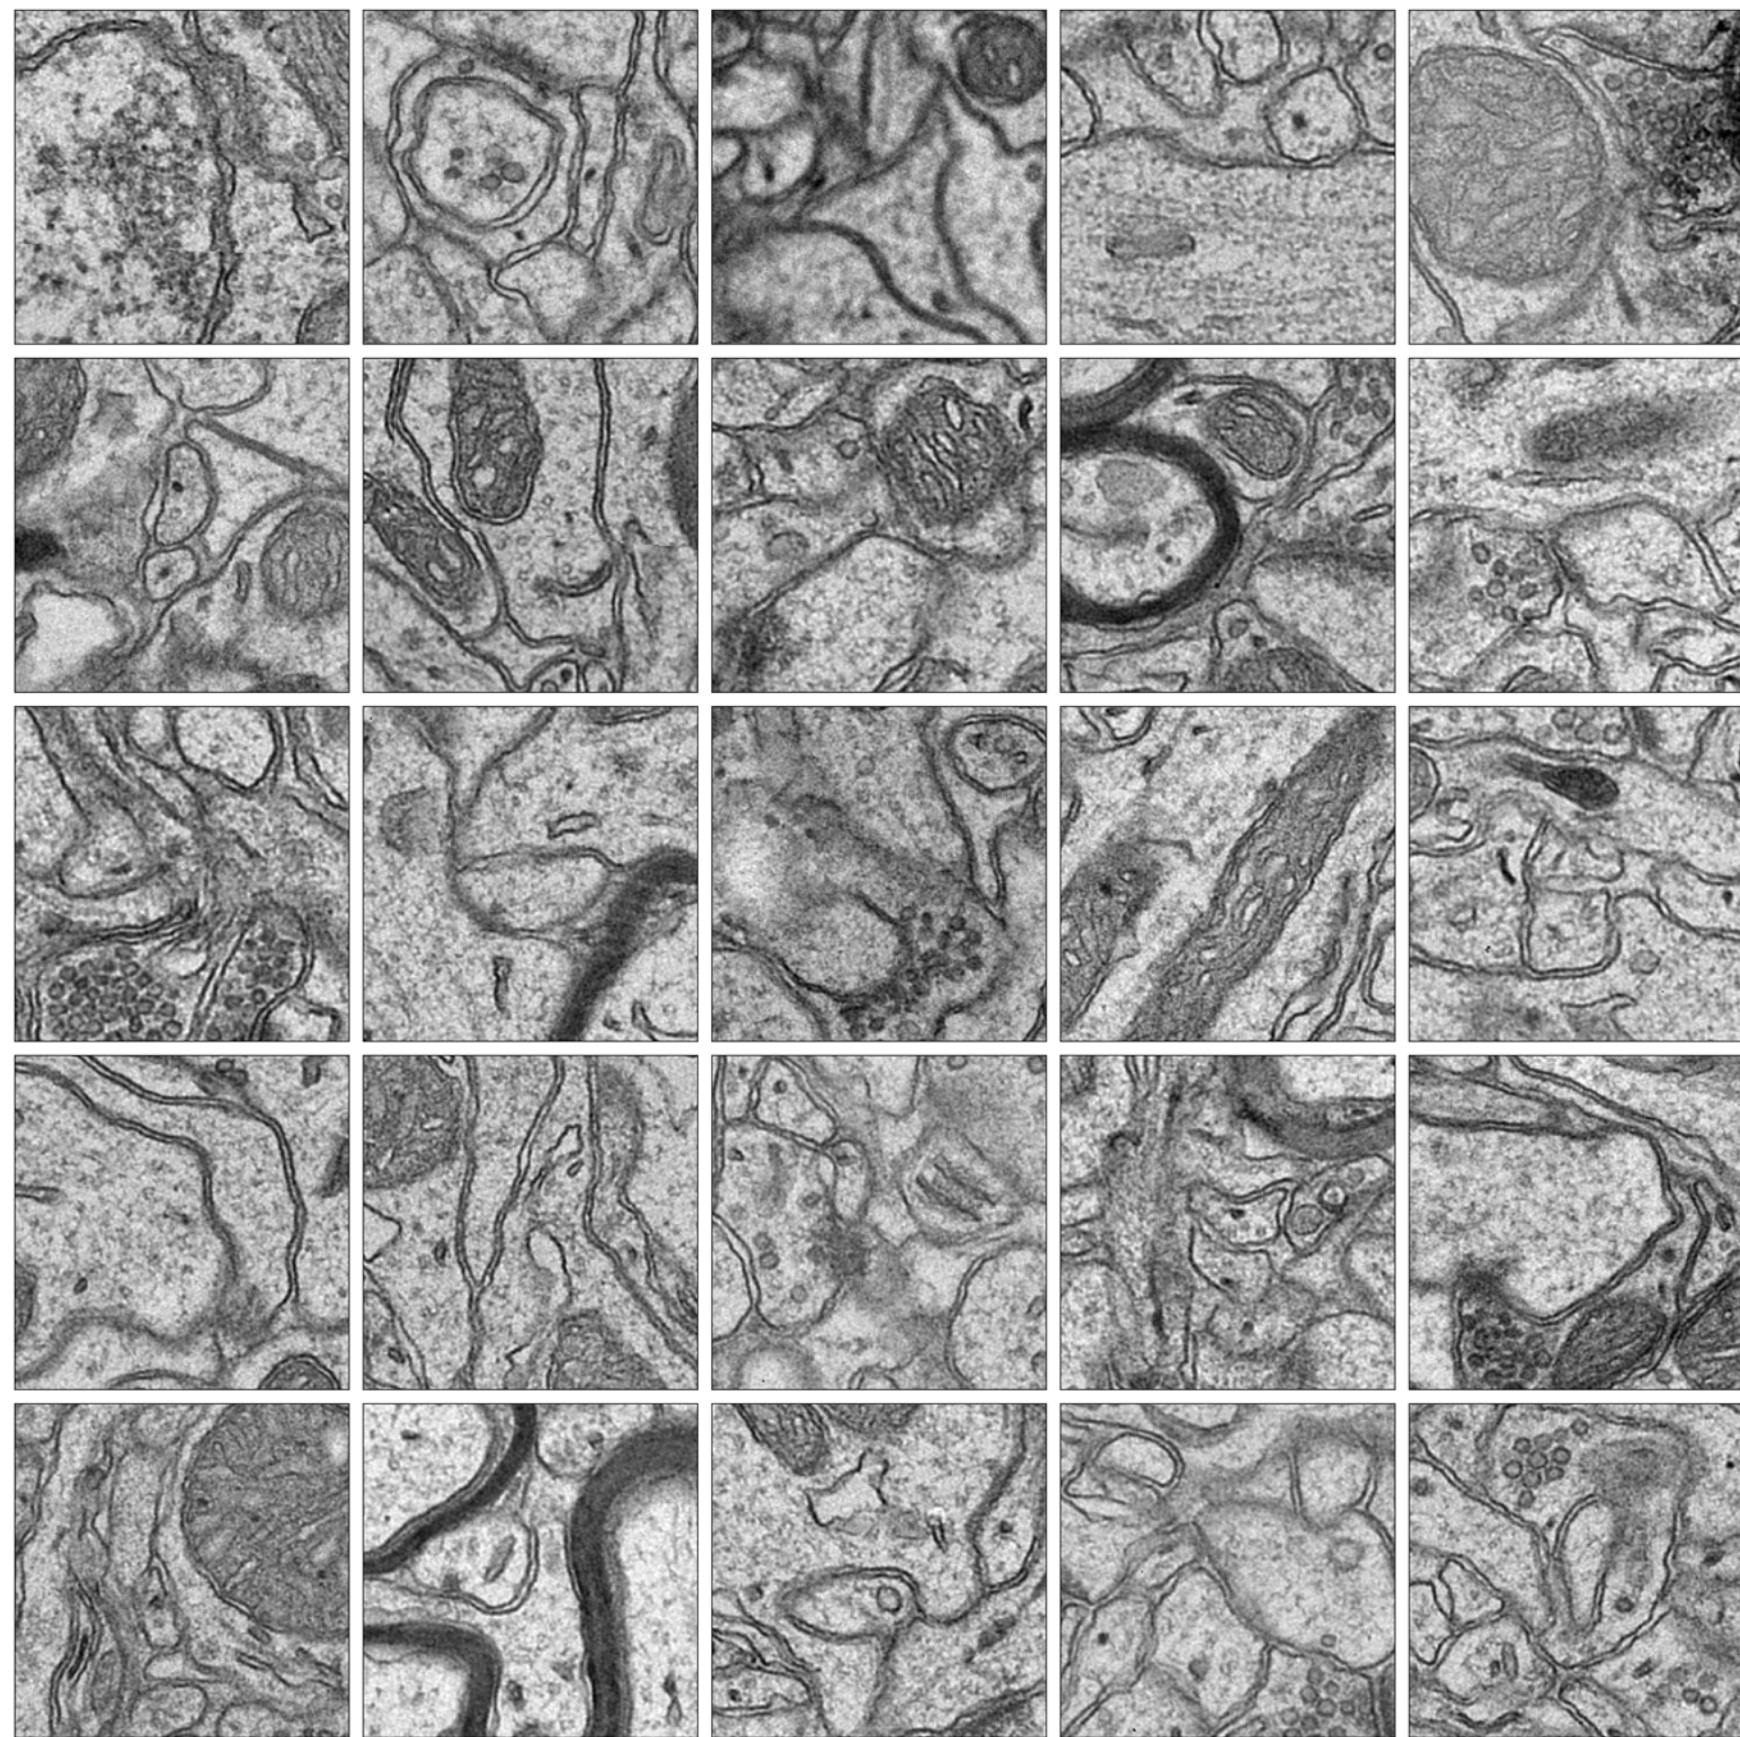

Bloss et al. 2018



## Supplementary Figure 5

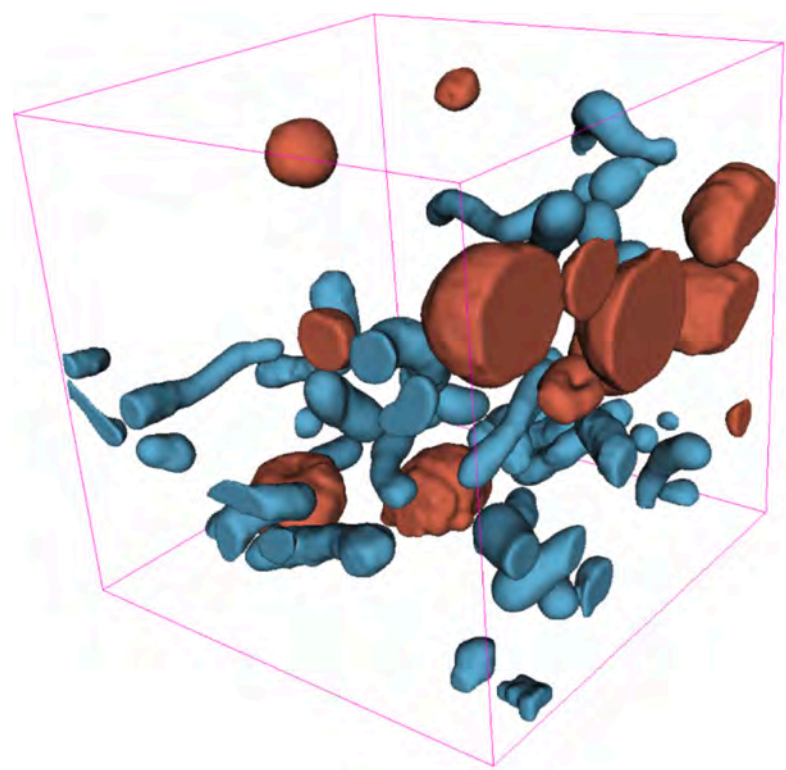

UroCell Ground Truth [16]

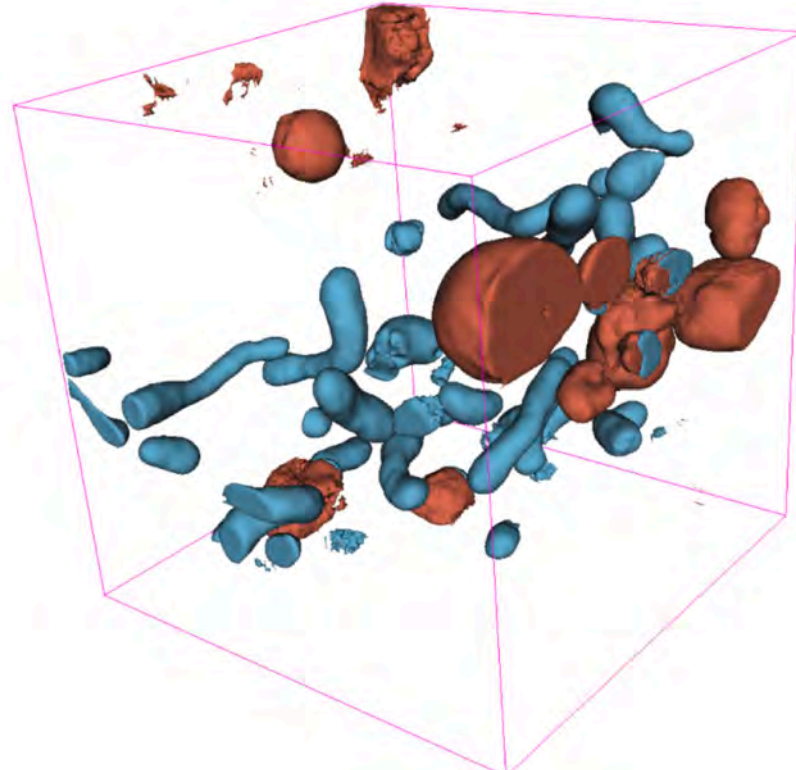

UroCell Publication  
Presented Results [16]

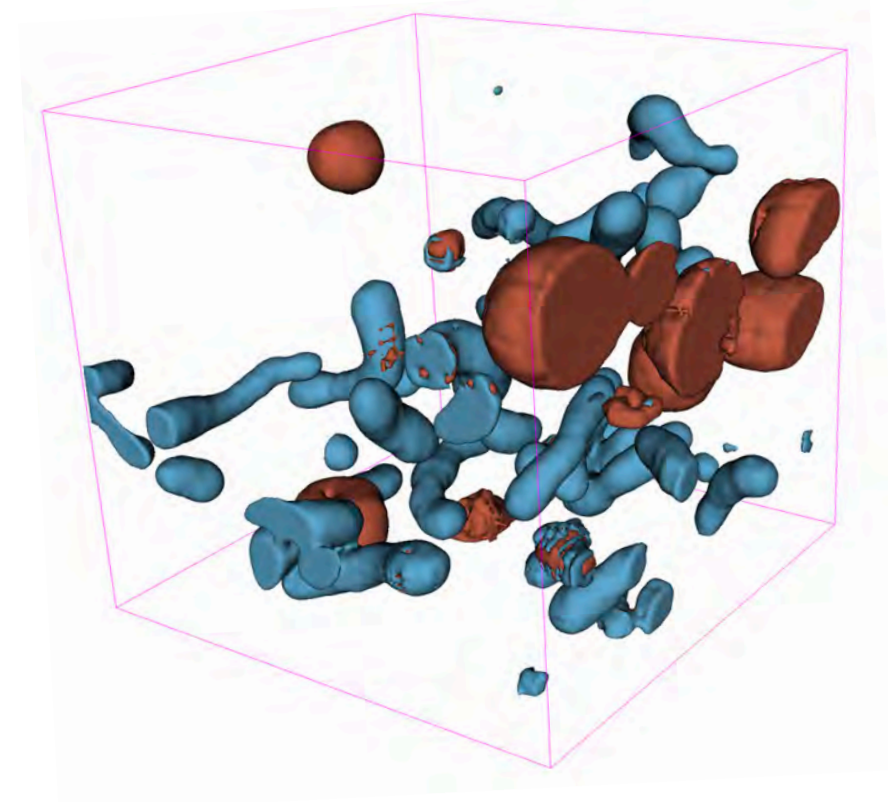

CEM500K-moco Results

Supplementary Figure 6

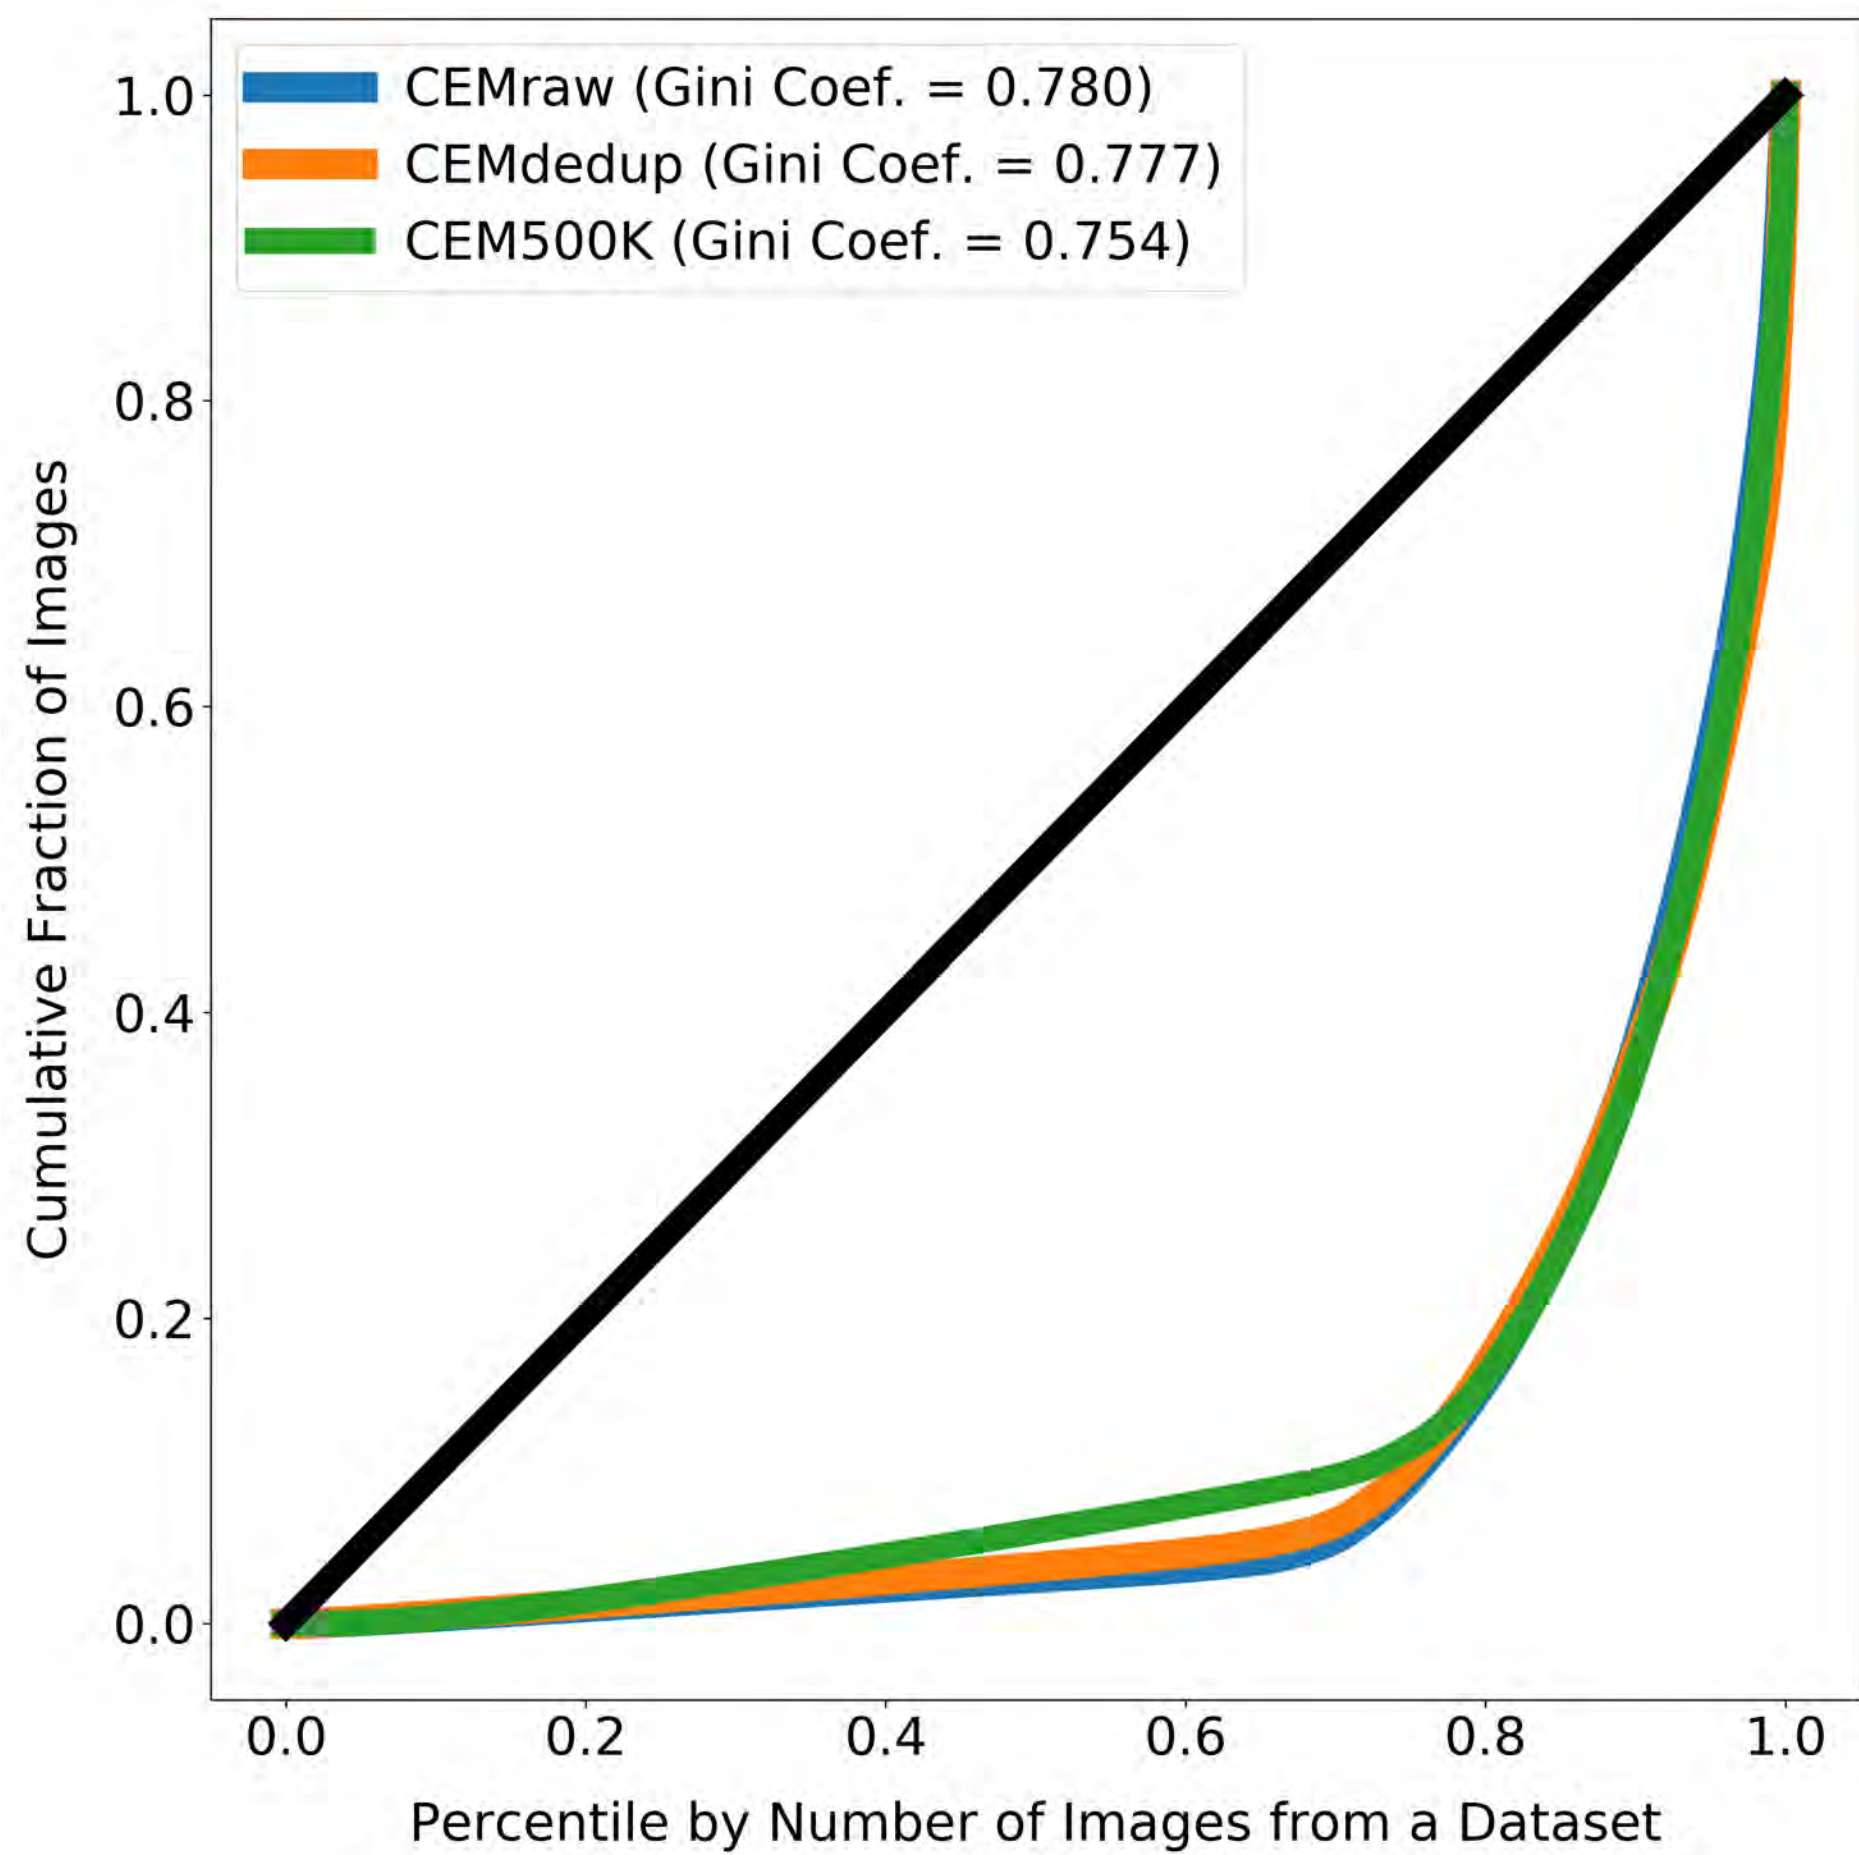

**Supplementary Figure 7**

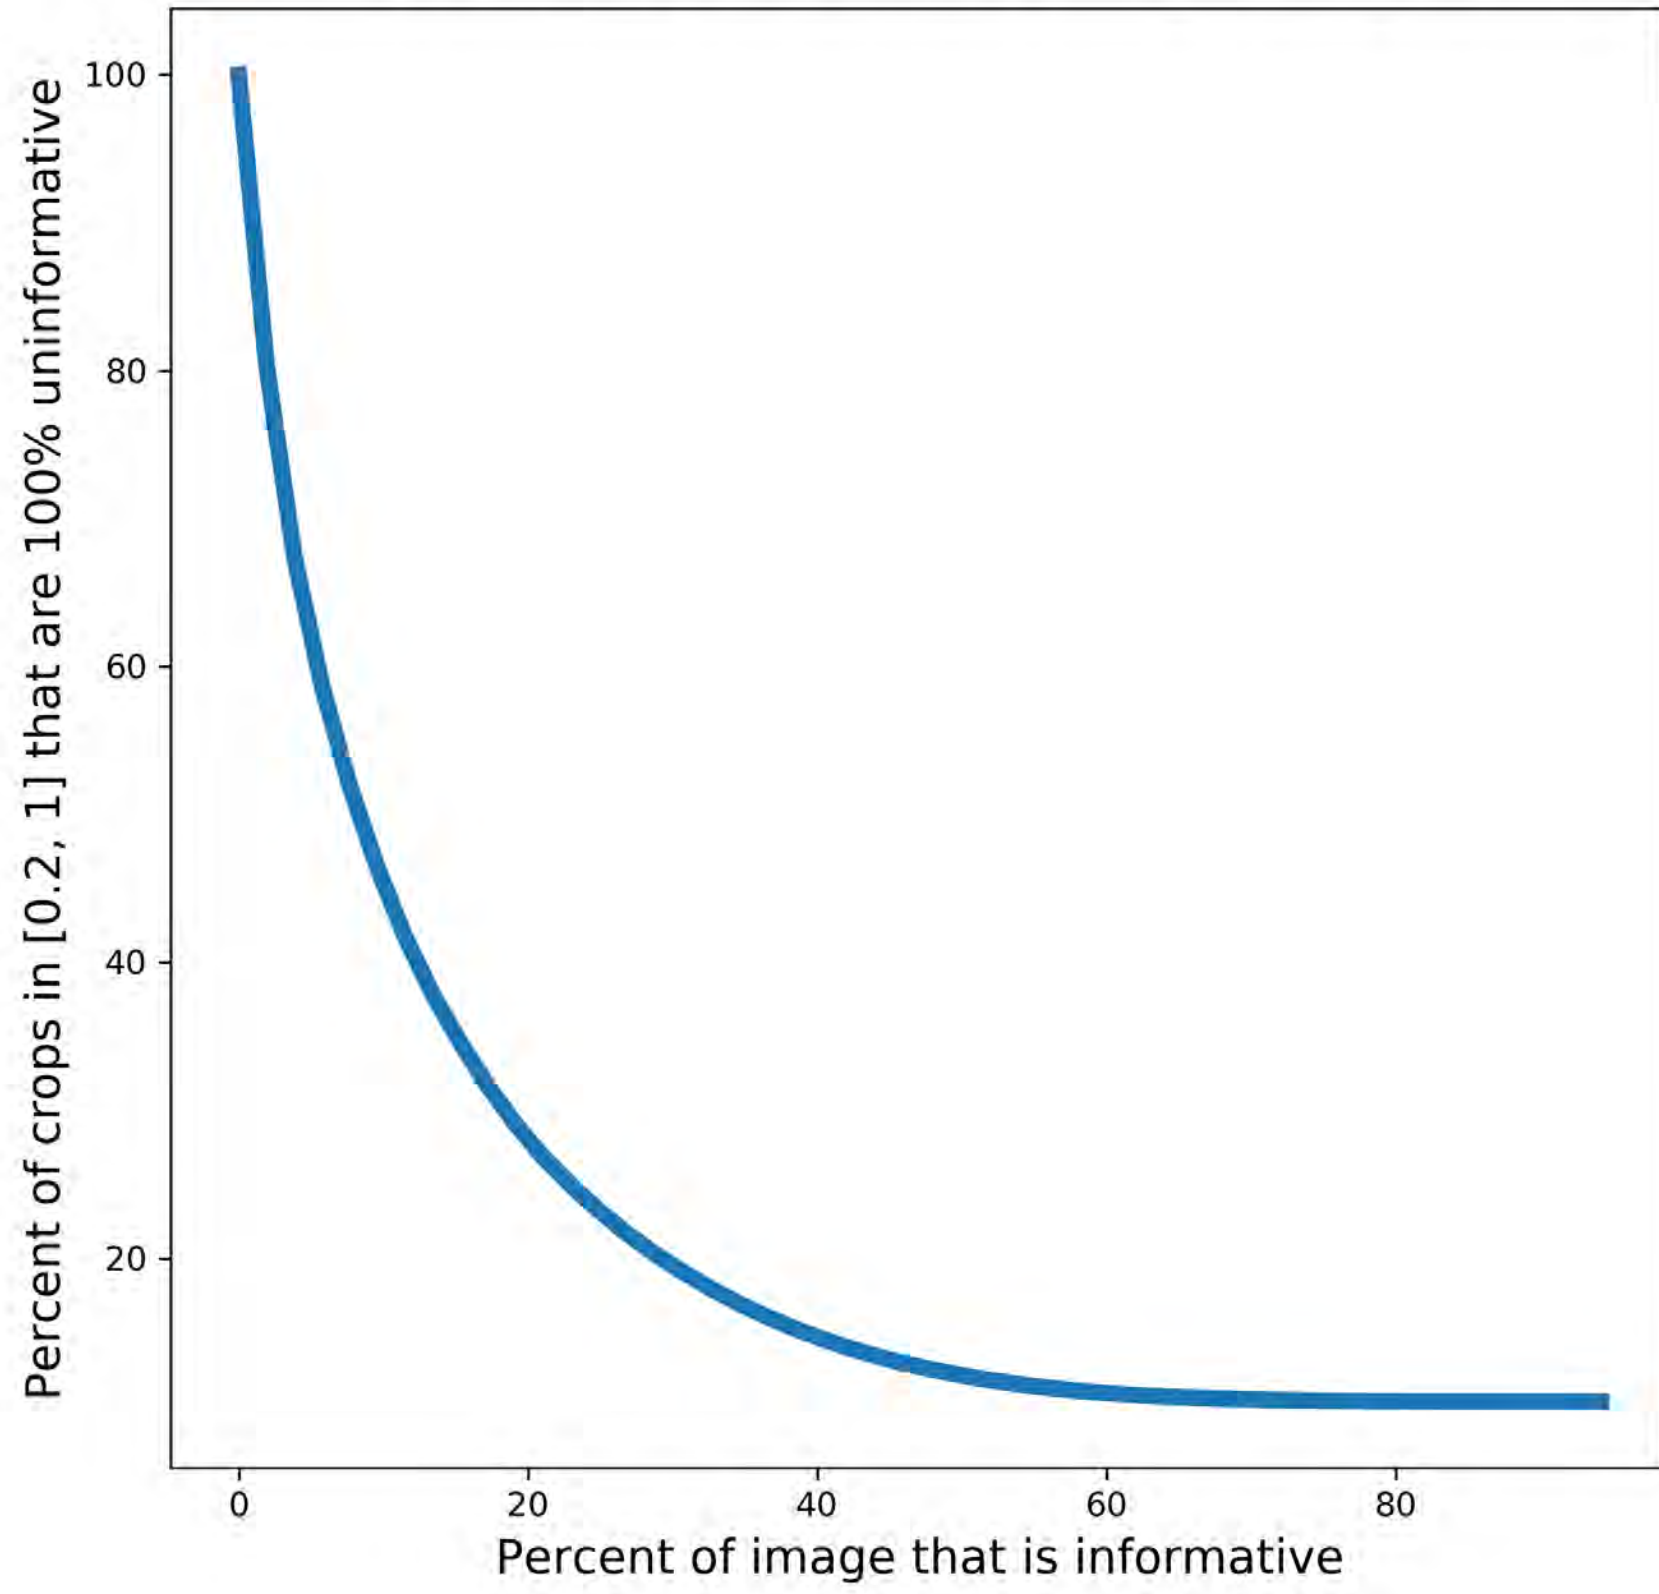

Source: https://www.biorxiv.org/content/10.1101/2020.12.11.421792v1.full.pdf
